# Supplementary material for: An exploratory study of problematic shopping and problematic video gaming in adolescents
Source: PLoS One. 2022 Aug 10;17(8):e0272228. doi: 10.1371/journal.pone.0272228 (PMC9365157; doi:10.1371/journal.pone.0272228)
Supplement: S1 Dataset — (CSV) [file pone.0272228.s006.csv]

ID	q2	q3a	q3b	q3c	q3d	q3e	q4	q5	q7a	q7b	q7c	q7d	q9	q53	q64	q71	q72	q73	q74	q75	q76	q80	q92	q95	q96	q97	q114	q115	q116	q117	q118	q119	q120	q130	q131	q132	q133	q134	q135	q136
2168	1		1				2	3			1		1	1	1	1	1	5	2	1	2	1	1	2	1	2	1							3	2	2	1	2	2	2
2169	1		1				2	3		1			1	1	1	1	5	6	3	2	2	1	1	1	1	2	2	2	2	2	2	2	2	1
2170	2		1				2	3					1	2	1	1	4	5	1	1	2	1	1	1	1	2	2	2	2	2	2	2	2	1
2171	2		1				2	3	1		1	1	2	1	1	1	3	1				1	1	1	1	1	1							1
2172	1		1				2	4		1	1	1	1	1	3	1	5	6	2	1	2	1	1	1	1	2	1							1
2173	2		1				2	3	1			1	1	1	1	1	4	5	2	1	2	1	1	2	1	1	2	2	2	2	2	2	2	2	1	2	2	2	2	2
2174	1		1				2	3		1	1		1	2	3	1	5	6	3	2	2		1	1	1	2	2	2	2	2	2	2	2	2	2	2	2	2	2	2
2175	1		1				2	3					1	1	1	1	5	2	1	1	2	1	1	1	1	2	1							1
2176	2		1				2	3	1					1	1	2						1	1	1	1	2	3	2	2	2	2	2	2	1
2177	2		1				2	3	1		1		1	1	1		4	6				1	1											4	1	1	2	2	2	2
2178	2		1				2	3		1			1	1	1	2						1	1	3	1	2	1							3	2	1	2	2	2	2
2179	1		1				2	3	1		1	1	1	1	1	2						1	1	1	1	2	2	2	2	2	2	2	2	2	2	2	2	2	2	2
2180	1		1				2	3		1	1		1	1	1	1	5	1				1	1	1	1	2	2	2	2	2	2	2	2	2	2	2	2	2	2	2
2181	2		1				2	4					1	3	3	1	3	5	1	1	2	1	1	1	1	2	2	1	2	2	2	2		2	2	2	2	2	2	2
2182	2		1				2	4	1			1	1	1	1	1	3	6	2	2	2	1	1	1	1	2	2	2	2	2	2	2	2	1
2183	1		1				2	4	1		1		1	3	1	1	3	5	4	4	2	1	1	2	1	2	2	2	2	2	2	2	2	1	2	2	2	2	2	2
2184	1		1				2	4	1	1	1	1	1	2	2	1	4	6	3	3	2	1	1	1	1	2	2	2	2	2	2	2	2	1
2185	2		1				2	4	1	1	1		1	1	2	1	4	6	3	3	2	1	1	2	1	1	2	1	1	1	2	1	2	1
2186	1		1				2	4					1	1	1	1	5	1				1	1	1	1	1	1							5	1	1	1	1	1	1
2187	2		1				2	4			1		1	1	1	1	2	5	3	2	2	1	1	1	1	2	3	2	2	2	2	2	2	2	2	2	2	2	2	2
2188	2		1					4			1	1	1	1	3	1	4	6	1	1	2	1	1	1	1	1	2	2	2	2	2	2	1	1
2189	2				1	PORTUGUE	2	4					1	3	1	1	3	5	2	1	2	1	1	1	1	2	2	2	2	2	2	2	2	1
2190	2		1				2	4					1	5	2	1	5	6	2	1	2	1	1	2	1	2	2	2	1	2	1	1	1	1
2191	2		1				2	4	1	1			1	1	1	1	5	6	3	2	2	1	1	1	1	2	2	2	1	2	2	2	2	1
2192	1		1				2	4				1		1	1	2						1	3	1	1	1	2	1	1	1	2	2	2	5	1	1	1	1	1	1
2193	1		1				2	1		1			1	1	1	1	2	4	1	1	2	1	1	3	2	2								4	2	1	2	2	2	2
2194	1		1				2	1	1				1	1	1	1	2	5	1	1	2	1	1	3	1	2	1							2	2	2	2	2	2	2
2195	2		1				2	1					1	1	1	1	3	1	1	1	2	1	1	1	1	2	1							1
2196	2		1				2	1					2	3	3	1	1	2	4	1	2	1	3	8	1	1	2	2	2	2	2	2	2	1
2197	2		1				2	1		1			1	1	1	2						1	1	2	1	2	3	2	2	1	2	1	2	2	2	2	2	2	2	2
2198	2		1				2	1		1			2	1	1	1	4	1				1	1	2	1	2	3	2	2	1	2	1	2	2	2	2	2	2	2	2
2199	2		1				2	1		1	1		1	1	1	1	3	1				1	1	1	1	2	1							1
2200	2		1				2	2		1	1		1	1	1	1	3	1				1	1	1	1	2	2	2	2	2	2	1	2	1
2201	2		1					2		1	1		1	1	1	1	5	1				1	1	1	1	2	2	2	2	2	2	1	2	2	2	1	2	2	2	2
2202	2		1					2	1	1	1		1	1	1	1	3	5	3	2	2		1	1	1	2	3	2	2	1	2	2	2	1
2203	2		1				2	2	1	1	1		1	1	1	1	2	1				1	1	1	1	2	3	1	2	2	2	2	2	1
2204	1		1				2	2		1			1		2	1	1	6	3	2	2	1	1	1	1	2	1							2	2	2	2	2	2	2
2205	1		1				2	2	1	1	1	1	1	2	1	1	4	6	1	1	2	1	1	1	1	2	3	2	2	2	2	2	2	1
2206	1		1				2	3				1	1	1	1	1	4	1				1	1	1	1		1							2	2	2	2	2	2	2
2207	1		1				2	3					1	1	1	1	4	1				1	1	1	1	2	2	2	2	2	2	2	2	3	2	2	2	2	2	2
2208	2		1				2	3	1	1	1		1	1	1	1	5	6	1	1	2	1	1	1	1	1	4	2	2	2	2	1	2	1
2209	1		1					3					1	5	3	1	4	5	2	2	2	4	1	2	1	2	2	1	2	2	1	2	2	2	2	2	2	2	2	2
2210	2		1				2	3	1	1	1		1	1	1	1	1	6	4	2	2	1	1	1	1	2	2	1	2	2	2	2	2	1
2211	2		1				2	3		1	1		1	1	1	1	1	3	2	2	2	1	1	1	1	2	2	1	2	2	2	1	2	2	2	2	2	2	2	2
2212	2		1				2	3	1		1		1	1	1	1	4	1				1	1	1	1	2	2	2	1	2	2	2	2	1
2213	1		1				2	4	1	1	1	1	1	3	3	1	1	5	5	3	2	1	1	4	1	2	2	2	2	2	2	2	2	2	2	2	2	2	2	2
2214	1		1					4		1		1	1	1	1	1	1	5	4	3	2	1	1	1	1	2	2	2	2	2	2	2	2	2	2	2	2	2	2	2
2215	1		1				2	4		1			1	3	5	1	4	4	5	5	2	1	2	3	1	2	2							2	1	1	2	2	2	2
2216	2				1	PORTUGUE	1	1		1	1		2	2	1		3	5	1	1	2	1	1	1	1	1	4	2	2	1	2	2	2	1
2217	1		1				2	1		1			1	1	1	2					2	1												2	2	2	2	2	2	2
2218	2		1				2	1			1		1	2	1	1	4	5	1	1	2	1	1	1	1	1	1							2	2	2	2	2	2	2
2219	2				1	ASIAN AM	2	1			1		1	1	1	2						1	1	1	1	2	2	2	2	2	2	2	2	2	2	2	2	2	2	2
2220	2		1				2	1		1	1		1	1	1	1	3	5	1	1	2	1	1	1	1	2	4	2	2	2	2	2	2	1
2221	1		1				2	3	1				1	2	1	1	5	6	5	4	2	1	5	3	1	2	2	2	2	2	2	2	2	5	2	1	1	2	2	2
2222	1		1				2	3					1	1	2	1	4	5	4	4	2	1	3	4	1	2	1							5	2	1	2	2	2	1
2223	2				1	HISPANIC	1	3			1		5	1	1	1	2	5	1	1	2	1	1	1	1	2	4	2	2	2	1	1	2	1
2224	2		1				2	3	1	1			1	5	3	1	3	4	3	4	2	1	1	1	1	2	2	2	2	1	2	2	2	1
2225	1		1				2	3		1	1		1	3	1	1	5	1	1	1	2	1	5	8	5	2	2	2	2	2	2	2	2	5	2	2	1	2	1	1
2226	2		1				2	3		1			2	1	2	1	2	1	1	1	2	1	1	4	2	1	2	2	1	1	2	1	1	2	2	2	2	2	2	2
2227	2		1				2	3	1				1	3	2	1	2	5	1	1	2	1	1	1	1	2	2	2	2	2	2	2	2	2	2	2	2	2	2	2
2228	2		1				2	3	1	1	1		1	3	5	1	4	5	3		2	1	1	1	1	2	2	2	2	2	2	2	2	1
2229	1		1				2	2		1			1	1	1	1	1	1				1	1	3	1	2	2	2	2	2	2	2	2	3	2	2	2	2	2	2
2230	1	1	1				1	2					6	1	1	1	1	2	7	2	1	1	5	5	1	1	1							5	2	2	1	2	1	1
2231	1		1				2	3		1	1		1	1	1	1	4	1				1	1	8	1	1	2	2	2	2	2	2	2	3	2	1	2	2	1	1
2232	1		1				2	3	1	1		1	1	1								1	2	8	1	2	2	2	2	2	2	2	2	3	1	2	2	2	2	2
2233	2		1				2	2		1			2	3	2	1	1	5	1	1	2	1	1	1	1	2	3	2	1	2	2	2	2	1
2234	1	1			1		1	2					1	1	1	1	5	6	2	1	2	1	5	8	1	2	1							3	2	1	2	2	2	2
2235	2		1				2	2	1				1	1	1	2						1	1	1	1	2	4	2	2	2	2	2	2	1
2236	1		1				2	2		1			2	1	1	1	2	1				1	1	1	1	2	1							3	2	2	1	2	2	2
2237					1		1	2		1			1	2	1	1	4	5	1	1	2
2238	1		1				2	2			1		1		1	2						1	1	1	1	2	1							2	1	2	2	2	2	2
2239	1		1				2	2		1			1	1	1		2	4	1	1	2	1	1	2	1	2	2	2	2	2	2	2	2	5	2	2	1	2	1	2
2240	2		1				2	2		1			1	1	1	1	1	1				1	3	3	1	2	4	1	1	2	2	1	2	2	2	2	2	2	2	2
2241	1		1				2	2		1			1	1	2	1	3	5	2	1	2	1	1	1	1	2	2	2	2	2	2	2	2	2	2	1	2	2	2	2
2242	1		1				2	2		1	1	1	1	1	1	1	4	5	2	2	2	1	1	2	1	2	1							3	2	2	2	2	2	2
2243	1		1				2	2	1	1			1	1	1	1	1	4	5	1	2	1	1	1	1		2	1	2	2	2	2	2	3	2	2	2	2	2	2
2244	2						1	2	1		1	1	1	1	1	1	5	1				1	1	1	1	2	2	2	2	2	2	2	1	1
2245	2		1				2	2	1		1	1	1	1	1	1	4					1	1	1	1	2	2	2	1	1	2	1	2	1
2246	1		1				2	2		1			1	1	1	1	1	2	2	1	2	1	1	2	1	2	1							4	2	2	2	2	1	2
2247	2		1				2	2	1	1	1		1	1	2	1	2	5	3	3	2	1	1	1	1	2	2	2	2	2	2	2	2	1
2248	1		1				2	2		1			1	1	1	1	4	5	1	1	2	1	1	1	1	2	1							1
2249	1		1				2	2	1	1	1		1	2	1	1	1	1				1	4	1	1	2	1							1
2250	1		1				2	2	1	1		1	1	1	1	2						1	2	3	1	2	1							2	2	2	2	2	2	2
2251	2		1				2	4					1	1	2	1	5	6	3	3	2	1	1	1	1	2	2	2	2	2	2	2	2	1
2252	1		1				2	4	1	1			1			1	5	6	2
2253	1		1				2	3			1		1	1	1	1	4	5	2	1	2	1	1	2	1	2	2	2	2	2	2	2	2	3	2	2	2	2	2	2
2254			1				2	3	1	1	1	1	1	1	1	1	1	6	1	1	2	1	1	1	1	2	1							3	2	2	2	2	1	1
2255	2		1				2	3	1		1		1	1	1	1	1	6	1	1	2	1	1	1	1	2	2	1	2	1	2	2	2	1
2256	2		1				2	3	1	1	1		1	1	1	1	4	1				1	1	1	1	2	2	1	2	2	2	1	2	2	2	2	2	2	2	2
2257	2		1				2	3	1	1		1	1	1	1	1	1	1				1	1	1	1	2	1							1
2258	2		1				2	3					1	3	2	1	2	5	2	1	2	1	1	1	1	1	1	2	2	2	2	2	2	1
2259	2		1				2	3			1	1	1	1	1	1	5	1				1	1	2	1	2	1							1
2260	2		1				2	3	1	1	1		2	3	3	1	1	3	1	1	2	1	1	1	1	2	2	1	1	1	1	1	1	2	2	2	2	2	2	2
2261	2		1				2	3		1	1		1	1	1	1	4	6	1	1	2	1	1	1	1	1	1							1
2262	1		1		1	HISPANIC	1	3		1			1			1	5	6	2	2	2	1	1	1	1	2	1	2	2	2	2	2	2	4	1	1	1	2	1	1
2263	2		1				2	3		1			1	3	2	1	4	6	4	2	2	1	1	1	1	1	1							2	2	2	2	2	2	2
2264	1		1				2	3			1		1	2	1	1	3	5	1	1	2	1	5	3	1	2	1							5	2	1	2	1	1	2
2265	2		1				2	3				1	1	1	3	1	5	6	3	3	2	1	1	1	1	2	3	1	1	2	2	2	2	1
2266	1		1				2	1	1	1	1		1	2	2	1	4	5	2	3	1	1	1	6	2	2	2	2	1	1	2	1	1	1
2267	2	1					2	1		1			1	1	1	2						1	1	1	1	2	1							2	1	1	2	2	2	2
2268	1	1					2	1						1	1	2						1	1	1	1	2	1							4	2	2	2	1	1	1
2269	1		1				2	1					1		1	2						1	1	1	1	2	1							4	2	2	2	1	1	1
2270	2		1				2	1			1		1	1	1	1	1	1				1	1	1	1	2	4	2	2	1	2	2	2	2	2	2	2	2	2	2
2271	1		1				2	1		1			1	1	1	1	3	4	1	1	2	1	1	3	1	2	1							1
2272	2		1				2	1		1		1	1	1	1	1	1	1				1	1	1	1	2	4	2	2	1	2	2	2	2	2	2	2	2	2	2
2273	1		1				2	4	1	1	1		1	1	1	1	3	4	3	3	2	1	1	3	1	2	1							5	2	2	2	2	2	2
2274	1		1				2	4			1		1	5	3	1	4	5	4	2	2	1	1	1	1	2	1	2	2	2	2	2	2	1	2	2	2	2	2	2
2275	1		1				2	4		1			1	2	2	1	1	5	1	1	2	1	1	1	1	2	1							2	2	2	2	1	2	1
2276	2		1				2	4	1		1		1	1	1	2						1	1	1	1	1	2	2	2	2	2	1	1	1
2277	1		1				2	4					1	1	3	1	6	1				1	1	1	1	1	2	2	1	2	1	1	1	1
2278	1		1				2	4					1	5	1	1	5	6	6	1	2	1	5	5	3	1	2	2	2	2	2	1	2	3	2	2	2	2	2	2
2279	2		1				2	2	1		1		2	2									1	1	1	2	3	2		1	2	2	2
2280	1		1				2	2		1			1		1	1	4					1	1		1		1	1						3	1		2
2281	1		1				2	2		1			1	1	1	1	1	6	1		2
2282	2		1				2	2		1	1		1	3	3	1	4	6	2	2	2						5	1	2	1		1	1	2	2	2	2	2	2	2
2283	1		1				2	1	1	1			1	1	1	1	3	5	1	1	2	1	5	2	1	2	3	2	2	2	2	2	2	5	2	1	1	2	2	2
2284	2		1				2	3		1			1	2	2	1	3	5	2	2	2	1	1	1	1	2	2	2	2	2	2	2	2	1
2285	2		1				2	2	1	1	1	1	1	1	1	1	5	6	3	1	2		1	1	1	2	3	2						1
2286	1		1				2	2		1		1	1	1	1	1	2	5	1	1	2	1	1	3	1	2	1							3	2	2	2	2	2	2
2287	1		1				2	2		1			1	1	1	1	4	5	2	2	2	1	1	1	1	2	2	2	2	2	2	2	2	2	2	2	2	2	2	2
2288	1		1				2	2		1			2	1	1	1	3	1				1	1	1	1	2	1							2	2	2	2	2	2	2
2289	1		1				2	2					1	3	1	1	1	4	5	2	2	1	5	1	1	2	2							3	2	2	2	2	2	2
2290	1		1				1	2					1	1	1	1	4	1				1	1	1	1	2	1							1
2291	2		1				2	2		1			1	1	1	1						1	1	1	1	2	1	2	2	2	2	2	2	1
2292	1		1				2	2		1	1		1	1	1	1	4	6	2	1	2	1	1	1	1	2	1							3	2	2	2	2	2	2
2293	1		1				2	2		1			1
2294	1		1				2	2	1				1	1	2	1	5		3	1		1	1	1	1		1	2	2	2	2	2	2		2	2	2	2	2	2
2295	2		1				2	2	1	1		1	2	1	2	1	1	5	3	1	2	1	1	1	1	1	1	2	2	1	2	2	1	1
2296	2				1	I'M A MI	2	2					2	4	3	1	2	5	1	1	2	1	1	1	1	2	1
2297	1		1					2		1	1		1	5	5	1	1	2	7	7	1	1	1	2	2	1	5	2	2	2	2	2	2	1
2298	2		1				2	2	1				1	4	3	1	2		2	2	2	2	1	1	1	2	3	2	1	1	2	2	1	1	2	2	2	2	2	2
2299			1				2	2					1	1	1	2						1	1	1	1	2	1							3	2	2	2	2	2	2
2300	1		1				2	2			1		1	1	1	1	2	4	1	1	2	1	3	1	1	2	1							5	2	1	2	2	2	2
2301	2		1				2	2	1	1	1		1	3	2	1	4	5	3	3	2	1	1	1	1	2	4	2	2	2	2	1	1	1
2302	2		1				2	2			1		1	1	1	1	2	5	7	1	2	1	1	1	1	2	2	2	2	2	2	2	2	1	2	2	2	2	2	2
2303	1		1				1	2	1	1	1		1	1	1	1	2	3	3	2	2	1	1	2	1	2	1	2	2	2	2	2	2	3	2	1	2	2	2	2
2304	1		1				2	2		1			1	4	5	1	2	5	4	3	1	2	5	8	4	1	5	1	1	2	2	1	2	1	1	2	1	1	2	2
2305			1				2	2		1	1	1	1	1	1	1	4	6	1	1	2	1	1	3	1	2	2	2	2	2	2	2	2	1
2306	2		1				2	2					2	5	3	1	1	2	3	2	1	1	3	1	1	1	2	2	2	1	2	2	2	1	2	2	2	2	2	2
2307	2		1				2	2					2	5	3	1	3	4	3	2	2	1	1	1	1	2	3	2	2	2	2	2	2	2	2	2	2	2	2	2
2308	2	1	1				2	3					2	5	3	1	1	6	2	1	2	1	1	1	1	1	2	2	2	2	2	2	2	2	2	2	2	2	2	2
2309	1		1		1	HISPANIC	1	3					1	3	4	1	1	4	4	2	2	1	3	2	1	2	2	2	2	2	2	2	2	1
2310	1		1				2	3				1	1	1	1	2						1	1	2	1	2	2	2	2	2	2	1	2	4	2	2	1	2	1	1
2311	1		1				2	3		1			1	3	5	1	3	5	2	2	2	1	1	3	1	2	1							3	2	2	2	2	2	2
2312	1				1	DOMINICA	1	3		1			1	5	5	1	1	4	2	1	2	1	4	1	1	2	1							3	1	2	2	2	2	2
2313	1		1				2	1		1			1	3	3	1	1	2	2	2	2	1	5	4	1	2	3	2	2	2	2	2	2	1
2314	1		1				2	1	1			1	1	1	1	1	2	4	1	1	2	1	3	3	1	2	2	2	2	2	2	2	2	3	1	1	2	2	2	2
2315	1		1		1	HISPANIC	1	1			1		2	1	1	1	2	1				1	3	2	1	2	2	2	2	2	2	2	2	4	2	1	1	2	1	1
2316	1		1				2	1		1			1	3	3	1	1	4	2	2	2	1	3	2	1	2	2	2	2	2	2	2	2		2	2	1	2	2	2
2317	2		1				2	1					1	1	1	1	1	1				1	1	1	1	2	3	2	2	2	2	2	2	1
2318	1		1				2	1					1	5	5	1	2	4	2	2	2	1	5	8	1	2	2	2	2	2	2	2	2	2	2	1	2	2	1	1
2319	1		1				2	3	1		1		1	1	1	2						1	1	1	1	2	1							2	2	2	2	2	1	1
2320	1		1				2	3	1	1	1	1	1	1	1	1	5	1				1	1	3	1	2	2	2	2	2	2	2	2	2	2	2	2	2	2	2
2321	1		1				2	3	1		1		1	1	1	2						1	1	1	1	2	2	2	1	2	2	2	2	2	2	2	2	2	2	2
2322	1		1				2	3					1	1	1	1	5	6	1	1	2	1	1	1	1	2	1							2	2	1	1	2	2	2
2323	1		1				2	3		1		1	2	2	1	1	4	6	1	1	2	1	1	1	1	2	2	2	2	2	2	2	2	4	2	1	2	1	1	1
2324	2		1	1	1	PUERTO R	1	3					1	1	1	1	3	1				1	1	1	1	2	3	2	2	2	2	2	2	2	2	2	2	2	2	2
2325	2		1				2	3		1	1		1	1	1	1	3	6	3	2	2	1	1	1	1	1	2	2	2	2	2	2	2	1
2326	1		1				2	3			1		2	1	1	1	2	5	1	1	2	1	1	1	1	2	2	2	2	2	2	2	2	5	1	1	1	1	1	1
2327	1		1				2	3		1			1	2	1	1	4	6	3	3	2	1	1	2	1	2	1								2	2	2	2	2	2
2328	2		1				2	3	1		1	1	1	1		1	3	1				1	1	1	1	2	2	2	2	2	2	2	2	1
2329	1		1				2	3	1	1	1		1	1	1	2						1	1	1	1	2	1							3	1	1	2	2	2	2
2330	1		1				2	3	1	1			1	1	1	1	5	6	1	1	2	1	1	3	1	2	1	2	2	2	2	2	2	4	1	1	2	2	1	2
2331	2		1				2	3			1		1	1	1	1	1	1				1	1	1	1	1	1							1
2332	2		1				2	3	1	1	1		1	1	1	1	4	6	2	1	2	1	1	1	1	1	2	1	2	2	2	2	2	1
2333	1		1				2	4		1			1	1	2	1	1	7	1	1	2	1	1	1	1	2				2	2	2	2	1
2334	1		1				2	4	1	1	1		1	1	1	1	5	7	1	1	2	1	1	1	1	1	2	2	2	2	2	2	2	2	1	2	2	2	2	2
2335	2		1				2	4			1		2	2	2	1	3	6	2	1	2	1	1	1	1	2	1							1
2336	2		1				2	4		1			1	4	1	1	3	5	2	2	2	1	1	1	1	2	2	2	2	2	2	2	2	2	2	2	2	2	2	2
2337	1		1				2	4				1	1	5	5	1	3	5	2	2	2	2	2	2	1	2	1							3	1	1	1	2	2	1
2337	2		1		1	HISPANIC	1	4	1			1	1	1	1	1	2	1				1	1	1	1	2	1							2	2	2	2	2	2	2
2338	2		1				2	4	1	1	1		1	1	3	1	3	4	4	3	2	1	2	1	1	1	3	2	2	1	2	1	2	1
2339	2		1				2	4					1	3	1	1	3	6	1	1	2	1	1	1	1	2	2	1	1	2	1	1	2	1
2340	2		1				2	4		1			1	3	2	1	1	6	3	1	2	1	1	1	1	2	3	2	2	1	2	2	2	2	2	2	2	2	2	2
2341	1		1				1	4		1			1	1	1	1	4	6	3	2	2	1	2	8	1	2	1							5	2	2	1	1	1	1
2342	1				1	HISPANIC	1	4		1			2	2	2	1	1	5	2	1	2	1	1	2	1	2	2	1	1	1	2	2	2	2			2	2	2	2
2343	1		1				2	4			1		1	1	1	1	2	1	1	1	2	1	1	1	1	1	2	2	2	2	2	2	2	5	1	1	1	2	2	2
2344	1				1	BRAZILIA	1	4	1	1	1		1	1	1	1	1	6	1	1	2	1	1	1	1	2	1							2	1	2	2	2	2	2
2345	1		1				2	4	1				2	3	2	1	4	5	2	1	2	1	5	3	1	1	1							2	2	2	2	2	2	2
2346	1	1	1		1		2	2		1			1	1		1	1	3	4	7	1	1	5	3	2	2	5	1	1	1	1	2	2	5	2	2	2	2	2	2
2347	1		1				2	2	1	1	1		1	1	1	1	2	1				1	1	2	1	2	3	2	2	2	2	2	2	2		1	2	2	1	2
2348	1		1				2	1		1			1	1	1	1	2	5	1	1	2	1	1	3	1	2	1							5	1	1	1	1	1	2
2349	1		1				2	1		1			1	1		1	1	1				1	1	3	1	2								2
2350	1							1		1			1	1	1	2						1	1	5	1	2	1							2	2	1	2	2	2	2
2351	1		1				2	1		1			1	0	4	1	2	4	3	1	2	1	4	3	1	1								5	2	1	1	2	1	1
2352	1		1				2	1		1			1	1	1	2						1	1	3	1	2	1							2	2	2	2	2	2	2
2353	1		1				1	3					1		4	1	3	4	2	1	2	3	1	4	2	2	1							2	2	2	2	2	2	2
2354	1		1				2	1	1	1			1	2	2	1	1	5	2	1	2	1	1	3	2	2	2	2	2	2	2	2	2	2	1
2355			1				2	1	1	1			1	1	1	1	4	1				1	1	2	1	2	2	2	2	2	2	2	2	2	1	2	2	2	2	1
2356	2		1				2	2					5	1	1	1	1	5			2		1	5	1	2	3	2		2	2	1	2	1			2	2	2	2
2357	1		1				2	2		1			1
2358	2		1					2				1	1	1	1	1						1	1	1	1	2	1							1
2359	1		1				2	2					2	1	1	1	3	6	2	7	2	1	1	1	1	2	1	2	2					1
2360	1	1					1	2	1				1	5	5	1	1	2	7	7	1	5	5	8	5	1	5	2	2	1	1	1	1	5	2	1	1	2	1	1
2361		1	1				1	2				1	2	5	5	1	1	2	7	7	1	5	5	6	3	1	5	1	1	1	2	1	2	5	1	1	1	1	1	1
2362	2		1				2	2		1		1	1	2	3	1	4	5	3	2	2	1	1	1	1	2	2	2	2	2		2	2	1
2363	2			1			2	2					1	1	1	1	2	1	2	1	2	1	1	1	1		2		2	2	2	2	2	1			2	2	2	2
2364	2		1				2	2		1			1	1	1	2						1	1	1	1	2	1							2	2	1	2	2	2	2
2365	1			1			2	2					1	1	1	1	1	5	1	1	2	1	1	1	1	2	1							2	2	2	2	2	2	2
2366	1		1				2	2		1		1	1	1	1	1	3	5	1	1	2	1	1	3	1	2	2	2	2	2	2	2	2	3	2	2	2	2	2	2
2367	1		1				2	2					1	1	1	1	3	1	1	1	2	1	1	1	1	2	2			2	2	2	2	2	2	2	2	2	2	2
2368	1		1				2	1		1			2	2	2	1	1	4	4	1	2	1	5	4	1	2	2	2	2	2	2	2	2	5	2	2	2	2	2	2
2369	1		1				2	2	1	1	1		2	1	1	1	1	4	5	3	2	1	1	1	1	2	2	2	2	2	2	2	2	2	2	2	2	2	2	2
2370	1						2	2					2	5
2371	1		1				2	2		1			1	1	1	1	2	5	1	1	2	1	1	1	1	2	2	2	2	2	2	2	2	2	2	2	2	2	2	2
2372	1		1				2	2		1			1	1	2	1	5	6	2	1	2	1	1	2	1	2	1							2	2	2	2	2	2	2
2373	1		1				2	2		1			2	1	1	1	1	5	4	4	2	1	4	3	1	2	1							1
2374	1		1				2	2					1			1	4	6	2	1	2		1	2	1	2
2375	2		1				1	2		1			1	1	1	2						1	1	1	1	2	2	2	2	2	2	2	2	2	2	2	2	2	2	2
2376	1		1				2	4			1		1	1	1	2						1	1	1	1	2	1							2	2	2	2	2	2	2
2378	1		1				2	4	1	1	1	1	1	1	1	1	3	5	1	1	2	1	3	2	1	2	2	2	2	2	2	2	2	1
2379	1		1				2	4			1		2	1	1	1	6	1				1	4	3	1	2	1							5	2	1	2	2	2	1
2380	1		1				2	4		1		1	1	1	1	1	1	1				1	1	1	1	2	2							2	2	1	2	2	2	1
2381	2		1				2	4	1		1		1	1	1	1	4	5	1	1	2	1	1	1	1	2	3	1	1	2	2	2	2	2	1	2	2	2	2	2
2382	2		1				2	4	1		1		1	1	1	2						1	1	1	1	1	2	2	2	2	2	1	1	1
2383	1		1				2	4	1	1	1		1	1	1	1	5	6	2	2	2	1	1	1	1	2	2	2	2	2	2	2	2	1
2384	1		1				2	4		1			1	2	3	1	1	5	5	4	2	1	1	1	1	2	2	2	2	2	2	2	2	2	2	2	2	2	2	2
2385	2		1				2	4	1		1	1	1	1	1	1	5	1	1	1	2	1	1	1	1	2	1							1
2386	1		1				2	2		1			1	1	1	1	3	1				1	1	1	1	2	2	2	2	2	2	2	2	4	2	2	2	2	2	2
2387	2		1				2	2	1	1	1		1	1	1	1	4	5	3	2	2	1	1	1	1	2	2	2	2	2	2	2	2	1
2388	1		1				2	2	1				1	5	5	1	1	2	7	7	1	5	5	8	5	1	5	2	2	2	2	2	2	5	2	2	2	1	1	1
2389	2		1				2	2		1			1	1	1	1	3	1				1	1	1	1	2	2	2	1	2	2	2	2	1
2390	2		1				2	2		1			1	1	1	1	4	5	1	1	2	1	1	1	1	2	3	2	2	2	2	2	2	1
2391	1		1				2	1				1	1	1	1	2						1	1	1	1	2	3	2	2	2	2	2	2	2	2	2	2	2	2	2
2392	2		1				2	1		1	1		1		1	1	4	5	4	1	2	1	1	1	1	2	1	2	2					1
2393	1		1				2	1					1	1	1	1	2	4	1	1	2	1	4	3	1	2	1							2	1	1	2	2	1	2
2394	2		1				2	1	1	1	1	1	1	1	1	2						1	1	1	1	2	2	2	2	1	2	1	2	1
2395	2		1				2	1			1		1	1	1	2						1	1	1	1	2	2	2	2	2	2	2	2	1
2396	1		1				2	1		1			1	1		1	3	5	5	7	2	1	3	6	1	2	2	2	2	2	2	2	2	3	2	1	2	2	1	2
2397	2		1				2	1		1			1	1	1	1	4	1	1	1	2	1	1	1	1	2	3	1	2	2	2	2	2	1
2398	1				1	HISPANIC	1	1		1			1										1	1	1	2	2	2	2	2	2	1	2	2	2	2	2	2	2	2
2399	1		1				2	2						1
2400	1		1				2	2		1			1	1	1	2																		5
2401	2		1				2	2	1	1			1	3	2	1	4	5	3	2	2	1	1	1	1	1	3	2	2	1	2	2	2	1	2
2402	2		1				2	2		1			1	1	1	1	4	1				1	1	1	1	2	1	1	2	2	2	2	2	1
2403	2		1				2	2		1			2	5	2	1	2	5	5	1	2	1	1	3	1	2	1							1
2404	1		1				2	2		1	1		1			1	1	5	7		1	1	2		2	1	3	1	1	2	1	1	2
2405	2	1					2	2	1		1	1	1	1	1	1	1	2	2	1	2	1	1	1	1	1	2	2	2	2	2	2	2	1
2406	2		1				2	2		1			1	1	1	1	4					1	1	1	1	2	3	2	2	2	2	2	2	1
2407	2		1				2	3		1			1	1	1	1	4	1				1	1	1	1	2	2	2	2	2	2	2	2	1
2408	1		1				2	3	1		1		1	2	3	1	4	5	1	1	2	1	1	3	1	2	2	2	2	2	2	2	2	2	2	2	2	2	2	2
2409	2		1				2	3	1	1	1		1	1	1	1	3	6	1	1	2	1	1	1	1	2	2	2	2	2	2	2	2	1
2410	2			1			2	3	1		1		1	1	1	2						1	1	1	1	2	1							1
2411	1		1				2	2					1	5	4	1	3	5	2	1	2	2	4	3	1	1	2	2	2	2	2	2	2				2	2	2	2
2412	1		1				2	2					1			1	1	3	1	1	2		1	2	1	2	1							2	1	1	2	2	2	2
2413	1		1					3		1			1	3	5	1	4	5	3	2	2	1	1	2	1	2	1							2	2	2	2	2	2	2
2414	1		1				2	3					2	1	1	1	3	4	1	1	2	1	1	1	1	1	2	2	2	2	2	2	2	5	1	1	1	1	1	1
2415	1		1					3		1			1								2		5
2416	1		1				2	3	1	1			1	2	1	1	5	6	3	1	2													4	1	1	1	1	1	1
2417	2		1				2	3	1				1	1	1	1	4	1				1	1	1	1	2	2	1	2	2	2	2	2	2	2	2	2	2	2	2
2418	1		1				2	3		1		1	1	1	1	1	4	5	2	1	2	1	1	4	1	2	1							2	2	2	2	2	2	2
2419	2		1				2	3	1	1	1		1	2	2	1	4	5	2	1	2	1	1	1	1	2	2	2	2	2	2	2	1	1
2420	1		1				2	2					1	2	2	1	2	6				1	2	3	1	2	1							2	2	2	2	2	2	2
2421	1		1				2	3					1	1	1	1	5	6	1	1	2	1	1	1	1	2	2	2	2	2	2	2	2	3	2	2	2	2	2	2
2422	2	1	1	1	1		1	3			1		1	1	1	1	4	1	1	1	2	1	1	3	1	2	1							3	1	1
2423	2		1				2	3	1	1		1	1	1	1	1	2	6	1	1	2	1	1	1	1	2	2	2	2	2	2	2	2	1
2424	2		1				2	3		1	1		1	1	2	1	4	5	2	1	2	1	1	1	1	2	2	2	2	2	2	2	2	2	2	2	2	2	2	2
2425	1		1				2	3		1			2	2	3	1	3	5	2	2	2	1	1	3	1	2	1							2	2	2	2	2	2	2
2426	1		1				2	3			1		1	3	1	1	5	6	2	2	2	1	1	1	1	2	1							2	2	2	2	2	2	1
2427	2		1				2	3					1	2	2	1	3	5	2	2	2	1	1	1	1	2	2	1	1	2	2	1	2	1
2428	2		1					3		1	1	1	1	1	1		4	6	1	1	2	1	1	1	1	2	2	2	2	2	2	2	2	1
2429	1		1				2	3					1	1	1	1	3	6	1	1	2	1	1	1	1	2	2	2	2	2	2	2	2	3	1	2	2	2	2	2
2430	1		1				2	3			1		1	3	1	1	5	6	3	3	2	1	1	1	1	2	2	2	2	2	2	2	2	3	2	2	2	2	1	2
2431					1	HISPANIC	1	2					1	5	4	1	1	5	5	3	2		5	5	1	2	3	2	2	2	2	2	2	2	2	2	2	2	2	2
2432	1		1				2	2	1			1	1	3	3	1	3	5	2	1	2	1	1	1	1	2	2	2	2	2	2	2	1	2	2	2	2	2	1	2
2433	1		1				2	2		1			1	1	5	1	4	4	1	1	2	1	1	1	1	2	3	2	2	2	2	2	2	3
2434	1		1				2	2		1			1	1	1	1	4	5	2	1	2	1	2	2	1	2	1							2	2	2	2	2	2	2
2435	1		1				2	2				1	1	1	1	2						1	1	1	1	2	2							2
2436			1				2	2					1	3	3	1	1	5	2	1	2	1	5	1	1	2	1							2	2	2	2	2	2	2
2437	1		1				2	2		1			1	2	2	1	4	5	2	1	2	1	1	1	1	2	3							2	2	2	2	2	2	2
2438	2		1				2	2	1	1			1	1	1	1	4	6	1	1	2	1	1	1	1	2	3	2	2	1	2	2	2	1
2439	2		1				2	2		1			1	1	1	1	5	6	2	1	2	1	1	1	1	2	2	2	2	2	2	2	2	1
2440	2		1				2	2		1			1	2	1	1	4	5	2	1	2	1	1	1	1	2	4	2	1	2	2	2	1	1
2441	1		1				2	2	1	1		1	1	1	3	1	4	5	5	4	2	1	2	4	1	2	2							2	1	1	2	2	2	2
2442	1		1				2	2		1			1	2	3	1	1	5	1	1	2	1	5	1	1	2	1							3	2	2	2	2	2	2
2443	2		1				2	2		1			1	3	3	1	3	5	2	1	2	1	1	1	1	2	3	2	2	2	2	2	2	1
2444	2		1				1	2	1	1	1		1	1	1	2						1	1	1	1	2	1							2	2	2	2	2	2	2
2445	2		1				2	2	1			1	4	3	2	1	1	2	2	3	2	1	3	2	2	1	1
2446	2		1				2	2		1			1	3	5	1	4	6	4	4	2	1		2	1	1	4	2	1	1	2	1	2	1
2447	1		1				2	1		1			1	1	1	1	1	3	2	1	2	1	3	3	1	2	3	2	2	2	2	2	2	3	1	1	2	2	2	2
2448	1		1				2	4					1	1	1	1	1	1				1	1	1	1	2	2	2	2	2	2	2	2	4	2	2	2	2	1	1
2449	1		1				2	4		1			1	1	1	1	3	1				1	1	1	1	2	2	2	2	2	2	2	2	5	2	1	1	1	1	1
2450	2		1				2	4	1	1			1	3	3	1	4	6	3	1	2	1	1	1	1	2	2	1	1	2	2	2	2	1
2451	1	1					1	4	1	1	1	1	1	1		1	1	4	1	1	2	1	1	1	1	1	2	2						2
2452	1		1				2	4	1	1	1		1	1	1	1	4	4	1	1	1	1	1	3	1	2	2	2	2	2	2	2	2	2	1	2	2	2	1	1
2453	1				1	PUERTO R	1	4		1	1	1	1	1	1	1	2	4	2	1	2	1	1	1	1	2	2	2	2	2	2	2	2	1	2	2	2	2	2	2
2454	2		1				2	4	1		1		1	1	3	1	1	5	1	1	2	1	1	1	1	2	2	2	2	2	2	2	2	1
2455	2		1				2	4	1	1			2	3	1	1	4	6	1	1	2	1	1	1	1	2	2	2	2	2	2	2	2	1
2456	2			1			2	4	1	1			1	3	2	1	1	5	2	1	2	1	1	1	1	2	3	2	2	1	2	2	2	2	2	2	2	2	2	2
2457	1		1				2	2	1	1	1		1	5	5			7	6			4	5	2	2	2
2458	1		1				2	2		1			1	3	1	1	4	5	3						4
2459	2		1				2	2		1			1														3	1
2460	1		1				2	2					2	2	1	1	1	1	1	4	1	5	3	1	2	1	3	2	2	1	2	1	1	3	1	2	2	1	1	1
2461	1		1				2	2					1	1	1	1	2	5	2	1	2	1					1							2	2	2	2	2	2	2
2462	2		1				2	2	1		1		1	3	1	1	3	5	2	2	2	1	1	1	1	2	1							1
2463	1		1				2	2			1		1	1	1	1	1	1	1		1					1									2	2	1	1	1	1
2464	1		1				1	2	1	1	1	1	1														1	1	1	1	1	1	1	2	1	1	1	1	1	1
2465	2		1				2	2		1	1	1	1	1	1	1	3	1	1	1	1	1	1	1	1	1	3	1	1	1	1	1	1	3	1	1	1	1	1	1
2466	1		1				2	2		1			2
2467	2		1				1	2		1			6	1		2				1		1			1		1	2	1		2		1			1	2	2	2	2
2468	2		1				2	2	1	1			1	1	1	1	1	3	1	1	1	1	1	1	1	1	1	1	1	1	1	1	1	1	1	1	1	1	1	1
2469	1		1				1	2		1			2	1	1	1	4	5	1	1	2	1	1	1	1	2	1							2
2470	1		1	1	1	KAZAKHST	2	2	1		1		1			1	1	1	1	1	1	1	5	8	5	1	5	2	2	1	2	1	1	5	2	2	1	2	1	1
2471	1		1				2	3					1	3	1	1	5	6	2	2	2	1	4	1	1	2	2	2	2	2	2	2	2	4	2	1	1	2	2	2
2472	1		1				2	3					1	1	1	2						1	1	1	1	2	1							1
2473	1		1		1	HISPANIC	1	3	1		1		2	1	1	1	4	1				1	1	1	1	2	1							3	1	1	2	2	2	2
2474	2		1				2	3					4	1	1	2							1	1	1	2	2	2	2	2	2	2	2	1
2475	1		1				2	3		1			1	1	1	1	2	3	4	2	2	1	1	2	1	2	2	2	2	2	2	2	2	2	2	2	2	2	2	2
2476	1		1				2	3					1	1	1	1	4	5	2	2	2	1	2	2	1	1	2	2	2	2	2	2	2	4	2	2	2	2	2	2
2477	1				1	HISPANIC	1	3		1			1	2	1	2						1	1	1	1	1	2	2	2	2	2	2	2	2	2	1	2	2	2	2
2478	2		1			NATIVE A	2	3			1		2	5	4	1	1	3	2	1	2	1	1	1	1	1	1	2	2	2	2	2	2
2479	2		1				2	3	1				2	5	4	1	1	5	4	2	2	1	1	1	1	2	3	2	2	2	2	2	2	2	2	2	2	2	2	2
2480	1		1				2	3					2	5	4	1	2	5	4	4	1		5	8	1	1	2	2						4	2	2	2	2	2	2
2481	1		1				2	3			1		1	1	1	2						1	1	1	1	2	1							4	2	1	2	2	2	2
2482	2		1				2	3	1	1			1	1		2			1	1	1		1	1	1	1	3	2	1	2	2	2	2	2	2	2	2	2	2	2
2483	2		1				2	3					1	1	3	1	5	6	1	1	2	1	1	2	1	1	2	2	2	2	2	1	2	1
2484	1		1				2	3					1	1	1	1	4	1				1	1	1	1	2	2	2	2	2	2	2	2	2	2	2	2	2	2	2
2485	1		1				2	3		1			1	2	2	1	3	5	2	1	2	1	3	4	1	2	1							2	2	2	2	2	2	2
2486	2		1				2	3	1	1			1	1	1	1	3	6	5	4	2	1	1	2	1	1	3	2	2	1	2	1	2	1
2487	2		1				2	3		1			2	2	3	1	4	5	1	1	2	1	1	1	1	1	1							1
2488	1		1				2	3		1			1	1	1		5	6	2	1	2	1	1	1	1	2	1							4	1	1	1	1	2	2
2489	1		1				2	4		1			1	3	4	1	5	6	1	1	2	1	5	2	1	2	1							2	2	2	2	2	2	2
2490	1		1				2	4	1			1	1	1	1	1	4	1	1	1	2	1	1	1	1	2	1							4	2	2	2	2	2	2
2491	1		1				2	1		1			1	1	1	2						1	1	3	1	2	1							1
2492	1				1	"GREEK,	2	1				1	1	1	1	1	4	1				1	1	1	1	1	1							4	2	1	1	2	2	2
2493	1		1		1	HISPANIC	1	1	1	1	1		1	1	1	1		3	1	1	2	1		8	1	2	1							2	2	2	2	2	2	2
2494	1		1				2	1	1	1	1	1	1	1	1	1	2	5				1	4	1	1	2	2	1	2	2	2	2	2	2	1	1	2	2	1	2
2495	1		1				2	1		1			1	2	3	1	4	5	2	2	2	1	3	3	1	2	2	2						2	2
2496	1		1				2	1		1			1	2	3	1	3	4	2	1	2	1	1	1	1	2	2	2	2	2	2	2	2	4	2	1	2	2	2	2
2497	1		1				2	1			1		1	3	2	1	3	4	2	1	2	1	1	2	1	2	2	1	1	2	1	1	2	1
2498	2		1				2	1		1	1		1	1	1	1	3	4	1	1	2	1	1	1	1	2	4	2	2	2	2	2	2	2	2	2	2	2	2	2
2499	1		1				2	1					1	1	1	2						1	1	1	1	2	2	2	2	2	2	2	2	3	2	1	2	2	2	2
2500	2			1			2	1		1			1	1		1	2	4	1	1	2						3	2	2	2	2	2	2
2501	2				1	HISPANIC	1	2		1			1	2	2	1	4	5	1	1	2	1	1	1	1	1	3	1	2	1	2	2	2	2	1	2	2	2	2	2
2502	1		1				2	2		1			1	1	1	1	4	5	1	1	2	1	3	3	1	2	2	2	2	2	2	2	2	4	2	2	2	2	2	2
2503	1		1				2	2		1			1	1	1	1	3	6	1	1	1	1	3	1	1	1	2	2	2	2	2	2	2	2	2	2	2	2	2	2
2504	2		1				2	4	1	1	1	1	1	1	1	1	5	1				1	1	1	1	2	1							1
2505	1		1				2	4	1		1		1	1	1	1	3	6	1		2	1	1	1	1	2	2	2	2	2	2	2	2	1	2	2
2506	2		1				2	4					1	2	3	1	4	5	2	1	2	1	5	1	1	2	2	2	2	2	2	2	2	1
2507	1		1				2	4		1			1	1	4	1	4	5	2	1	2	1	1	1	1	2	2	1	2	2	2	2	2	2	2	2	2	2	2	2
2508	1		1				2	4		1			1	2	5	1	4	5	4	2	2	1	4	3	1	2	2	2	2	2	2	2	2	3	2	2	2	2	2	2
2509	2		1				2	4		1			1	3	3	1	3	4	4	4	2	1	1	1	1	1	2	1	1	2	2	1	1	1
2510	1		1				2	4		1	1	1	1	1	2	1	5	7	4	2	2	1	1	1	1	2	3	2	2	2	2	2	2	2	2	2	2	2	2	2
2511	2		1				2	4	1				1	2	5	1	3	5	3	4	2	2	1	7	5	1	3	2	2	1	2	1	2	1
2512	2				1	PORTUGES	2	4					1	3	1	1	4	6	2	1	2	1	1	1	1	2	3	2	2	2	2	2	2	1
2513	1		1				2	4	1				1	1	1	1	1	5	2			1	1	1	1	2	1							3	2	1	2	1	2	2
2514	2		1				2	4			1		1	3	2	1	4	5	2	1	2	1	1	1	1	2	2	2	2	2	2	2	2	1			2	2	2	2
2515	2		1				2	4				1	1	3	1	1	4	6	4	2	1	1	1	3	2	1	3	1	1	1	1	1	1	1
2516	1		1				2	4	1		1		1	5	5	1	1	3	4	3	2	2	3	1	1	2	2	2	2	2	2	2	2	2	2	2	2	2	2	2
2517	1		1				2	4					2	4	5	1	1	2	7	5	1	2	1	1	1		1							1
2518	2		1				2	4	1		1		1	2	1	1	4	6	3	1	2	1	1	1	1	2	3	2	1	1	1	1	1	1
2519	2		1				2	4					1	1	2	1	5	6	5	5	2	1	1	1	1	2	3	2	2	1	2	1	2	1
2520	1		1				2	4			1		1	1	1	1	3	5	2	2	2	1	1	2	1	1	1							3	1	1	1	2	1	2
2521	1		1				2	4		1	1		1	1	1	1	2	6				1	1	1	1	2	1							4	2	2	2	2	1	1
2522	1		1				2	4	1	1			1	1	1	1	3	7	7	1	2	1	1	1	1	2	1							2	2	2	2	2	2	2
2523	1		1				2	4	1	1	1	1	1	2	1	1	5	6	1	1	2	1	1	3	1	2	2	2	2	2	1	2	2	3	2	2	2	2	2	2
2524	2		1				2	4	1				1	1	1	1	3	6	3	1	2	1	1	1	1	2	2	2	2	2	2	2	1	1
2525	1		1				2	4	1	1	1		1	1	1	1	5	6	2	2	2	1	1	1	1	1	1							3	2	1	1	2	2	2
2526	1		1				2	1		1	1		1	1	1	1	4	1				1	1	1	1	2	1							4	2	2	2	2	2	2
2527	1		1				2	1		1			2	1	1	1	4	5	1	1	2	1	1	1	1	2	1	2	2	2	2	2	2	2	2	2	2	2	2	2
2528	2		1				2	1					2	4	1	1	2	2	5	1	1	1	1	2	1	2	4	2	1	1	2	2	2	1
2529	1		1				2	1		1	1		1	1	1	1	3	1				1	1	1	1	2	1							2	2	2	2	2	2	2
2530	1		1				2	1	1	1			1	2	1	1	3	4	1	1	2	1	1	3	1	2	1							2	1	1	2	2	2	2
2531	2		1				2	1		1			1	1		1	2	1					1	1	1	2	3	2	2	2	2	1	2	1
2532	2		1				2	1			1		1	1	1	2						1	1	1	1	2	3	2	1	2	2	2	2	1
2533	2		1				2	1			1		1	1	1	2					2	1	1	1	1	2	1							2	1	2	2	2	2	2
2534			1				2	1		1			1	3	3	1	3	5	2	1	2	1	1	8	1	2	3	2	2	2	2	2	2	1
2535	1		1				2	1					1	1	1	1	2	5	1	1		1	1	1	2	1	1							3	2	1	1	1	1	2
2536	1		1				2	1		1			1	1	1	1	4					1	1	1	1	2
2537	2		1				2	1			1		1	3	1	1	2	5	2	1	2	1	1	2	1	2	2	2	2	2	2	2	2	1
2538	1			1			2	1			1		1	1	1	1	3	4	1	1	2	1	1	2	1	2	2	1	1	2	2	2	2	1
2539	1		1				2	1	1	1	1	1	1	1	1	2						1	1	2	1	2	1							3	2	2	2	2	2	2
2540	1		1				2	3	1	1	1		1	1	1	1	1	6	2	1	2	1	2	1	1	2	1	2	2	2	2	2	2	2	1	1	2	2	1	1
2541	1		1				2	3		1			2		2	1	1	5	4	3	2
2542	2		1		1	LATINO	1	3	1	1	1		1	4	3	1	1	3	6	1	2	1	1	1	1	1	3	2	1	2	1	1	1	1
2543	1		1				2	3					1	1	1	1	1	4	2	1	2	1	1	3	1	1	1							3	2	1	1	2	2	2
2544	2		1				2	3			1		2	1	2		4	6	1	1	2		1	1	1	2	2	2	2	2	2	2	2		2
2545	2		1				2	3					1	1	1	1	1	5	6	1	2	1	1	1	1	1	3	2	2	2	2	2	2	2	2	2	2	2	2	2
2546	2		1				2	4	1	1	1	1	1	1	1	1	2	1				1	1	1	1	2	1							1
2547	2		1				2	4	1	1	1		1	1	2	1	5	6	2	1	2	1	1	1	1	2	2	2	2	2	2	2	2	1
2548	2		1				2	4	1				1	1	1	1	5	6	2	2	2	1	1	1	1	2	3	2	1	2	2	1	2	1
2549	2		1				2	4					1	2	1	1	5	6	2	1	2	1	1	1	1	2	2	2	2	2	2	2	2	1
2550	1		1				2	4	1	1			1	5	5	1	2	4	5	3	2	1	1	1	1	2	1							2	1	1	2	2	2	2
2551	1		1				2	4			1		1	3	5	1	1	2	7	7	1	1	1	8			1							1	2	2	2	2	2	2
2552	1		1				2	4		1			2	1	1	1	4	6	4	4	2	1	1	3	1	2	2	2	2	2	2	2	2	2	2	2	2	2	2	2
2553	2			1			2	3			1		1	2	1	2						1	1	1	1	2	1							1
2554	2			1			2	3	1	1	1		1	1	1	1	2	6	1	1	2	1	1	1	1	2	2	2	1	2	2	2	2	1
2555	2		1					3	1	1	1	1	1	1	1	1	4	1				1	1	1	1	2	2	2	2	2	2	2	2	1
2556	2		1				2	3	1	1	1		1	1	1	2						1	1	1	1	2	2	1	2	2	2	2	2	1
2557	2		1				2	1		1			1	1	1	1	1	1				1	1	2	1	2	2	1	2	2	2	1	2	1
2558	1			1			2	1		1			1	1	1	2					2	1	1	1	1	2	1								2	2	2	2	2	2
2559	1		1				2	1		1			1	1	1		1	4	1	1	2	1	1	3	1	2	2	2	2	2	2	2	2	2
2560	2		1				2	1		1			1	1	1	1	4	5	1	1	2	1	1	1	1	2	1							1
2561	2		1				2	1		1			1	1	1	1	4	5	2	1	2	1	1	1	1	2
2562	1		1				2	1					1	1	1	1	4	1	1	1	2	1	1	1	1	2	1							2	2	2	2	2	2	2
2563	1		1				2	1		1			1	1	1	1	4	5	2	1	2	1	3	3	1	2	2	2	2	2	2	2	2	3	2	1	2	2	2	2
2564	2		1				2	1			1		1	1	1	1	4	1				1	1	1	1	1	2	2	2	2	2	2	1	2	1	2	2	1	2	2
2565	1		1				2	1	1	1		1	1	1	1	1	4	1				1	3	3	1	2	2							2	2	2	2	2	1	2
2566	2		1				2	2		1			1	3	3	1	2	5	3	1	2	1	1	1	1	2	2	2	2	2	2	2	2	1
2567	2		1				2	2			1		1	1	1	2						1	1	1	1	2	2	2	2	2	2	2	2	2	2	2	2	2	2	2
2568	1		1				2	2		1			1	1	1	2						1	1	1	1	2	1							2	2	2	2		2	2
2569	1			1			2	2		1	1		1	1	1	1	1	1				1	1	1	1	2	1							2	1	1	2	2	1	2
2570	1		1				2	2					1	1	1	1	3	4	3	2	2	1	3	2	1		1	2						5	2	1	1	2	1	1
2571	2		1				2	2		1			2	2	3	1	2	4	2	1	2	1	1	1	1	1	2	2	2	1	2	2	2	1
2572	1		1				2	2	1	1	1		1	1	2	1	3	6	3	1	2	1	1	2	1	2	2	2	2	2	2	1	2	2	2	2	2	2	2	2
49	2		1				2	2		1	1		1	2	1	1	1	1	1	1	2	1	1	1	1	2	2	2	2	2	2	2	2	1
50	2		1				2	2		1			1	5	3	1	3	5	5	4	2	1	2	2	1	1	3	2	2	2	2	2	2	2	2	1	2	2	2	2
51	2		1				2	2			1		1	1	3	1	3	5	2	1	2	1	1	1	1	2	2	2	2	2	2	2	2	1
52	2		1				2	2					1	5	5	1	3	4	3	3	2	1	1	1	1	2	1							1
53	1		1				2	2			1		1	1	1	1	2	1				1	1	1	1	1	1							3	2	2	2	2	2	2
54	1		1				2	2		1			1	3	4	1	1	2	5	4	2	3	5	7	1	2	2	2	2	2	2	2	2	2	2	2	2	2	2	2
55	2		1				2	2		1			1	3	3	1	4	5	5	3	2	1	1	1	1	2	2	2	2	2	2	2	2	1	2	2	2	2	2	2
56	2		1				2	2		1	1		1	3	2	1	2	5	3	1	2	1	1	4	1	1	2	1	2	1	2	2	1	2	2	2	2	2	2	2
57	2		1				2	2		1			1	3	3	1	4	5	5	2	2	1	1	1	1	2	3	2	2	2	2	1	2	1
58	2		1				2	2	1	1	1	1	1	1	1	1	4	5	5	3	2	1	1	1	1	2	4	2	2	2	2	2	2	1
59	2		1				2	4				1	1	4	3	1	3	6	1	1	2	1	1	1	1	2	3	1	2	2	2	2	2	2	2	2	2	2	2	2
60	2		1				2	4	1		1		1	1	1	1	4	6	1	1	2	1	1	1	1	2	1							1
61	1	1		1			1	3				1	6	5	5	1	1	2	6	6	2	5	5	8	3	2	1							1
62	2			1			2	4			1	1	1	1	1	1			2	1	2	1	1		1		1							2	2	2	2	2	2	2
63	2		1				2	3		1	1		2	2	1	1	2	6	1	1	2	1	1	1	1	1	1							1
64	1		1				2	4					2	1	3	1	6	7	4	3	2	1	1	2	1	2	1							3	1	2	2	2	2	2
65	2		1				2	4				1	1	1	1	1	1	2	2	1	2	1	1	1	1	2	2	1	2	2	2	1	2	2	2	2	2	2	2	2
66	1		1				2	4					2
67	2		1				2	4					2	1	3	1	4	5	3	3	2	1	2	2	1		3	2	2	1	1	1	2	2	1	2	2	2	2	2
68	2		1				2	4				1	1	1	1	1	6	7	1	1	2	1	1	1	1	2	2	2	1	2	2	2	2	1
69	1		1				2	2			1	1	1	1	3	1	4	5	2	2	2	1	5	1	1	2	1							2	2	1	2	2	2	2
70	1		1		1	NATIVE A	2	2		1			1	1	3	1	3	6	4	3	2	1	1	2	1	2	1	2	2	2	2	2	2	1
71	2		1				2	2					1	1	2	2						1	1	2	1	2	2	2	2	2	2	2	2	1
72	2		1				2	2	1	1	1		1	1	1	1	1	5	2	1	2	1	1	1	1	2	2	2	2	2	2	2	1	1
73	2		1				2	2		1	1		1	1	1	1	4	5	4	3	2	1	1	1	1	2	1							2	2	2	2	2	2	2
74	2		1				2	2		1	1		1	1	1	1	4	5	2	2	2	1	1	1	1	2	1							2	2	2	2	2	2	2
75	2		1				2	2				1	1	1	1	1	2	5	3	3	2	1	1	1	1	2	1							2	2	2	2	2	2	2
76	2		1				2	2					1	3	3	1	4	5	1	1	2	1	1	2	1	2	1							1
77	2		1		1	NATIVE A	2	2		1	1		2	1	1	1	4	1				1	1	2	1	2	1							1
78	1		1				2	2			1		1	1	1	1	3	4	1	1	2	1	1	1	1	2	1							2	2	2	2	2	2	2
79	2		1				2	4					1	3	2	1	5	6	3	2	2	1	1	2	1	2	3	2	2	2	2	2	2	1
80	1			1			2	4		1		1	2	5	3	1	2	5	4	4	2	3	1	1	1	2	3	2	1	2	2	2	2	2	2	2	2	2	2	2
81	1		1				2	4					1	4	1	1	6	1				1	1	2	2	1	2	2	2	2	2	2	2	5	1	1	1	1	1	1
82	2	1					2	3		1			2	2			6	7	3	1	2
83	1		1				2	4				1	1	2	3	1	5	6	1	1	2	1	3	3	1	2	2	2	2	2	2	2	2	2
84	2		1				2	4					1	2	3	1	3	5	6	6	2	1	3	2	1	2	2	2	2	1	2	2	2	1
85	1		1				2	3		1		1	2	2	3	1	5	6	5	5	2	1	1	1	1	2	2	2	2	2	2	2	2	2	2	2	2	2	2	2
86	2		1				2	4					1	3	2	1	5	6	5	4	2	1	1	2	1	2	4	1	1	1	1	1	1	1
87	2		1				2	4	1		1		2	1	1	1	5	7	1	1	2	1	3	1	1	2	3	2	1	1	1	1	2	2	1	2	2	2	2	2
88	2		1				2	4	1	1	1		1	1	1	1	4	6	3	2	2	1	1	1	1	2	2	2	2	2	2	2	2	2	2	2	2	2	2	2
89	2		1				2	3	1				1	2	2	1	3	6	5	5	2	1	3	1	1	2	1							1
90	2		1				2	3	1	1		1	1	1	4	2						1	1	1	1	1	3	1	2	2	2	2	2	1
91	1		1				2	3		1			1	1		1	4	5				1	1	1	1	2	1							5	2	1	2	2	2	2
92	2		1				2	4	1		1		1	2	3	1	1	7	1	1	2	1	1	1	1	2	2	1	1	2	2	2	2	1
93	2		1				2	4	1		1		1	2	1	1	5	6	3	3	2	1	1	1	1	2	3	2	1	2	2	2	2	2	2	2	2	2	2	2
94	1		1				2	4		1			1	1	1	1	1	1				1	1	1	1	2	1							5	2	1	1	1	1	2
95	1		1				2	4					1	2	3	1	3	5	2	2	2	1	1	1	1	2	1	2	2	2	2	2	2	1	2	2	2	2	2	2
96	1		1				2	4					2	1	5	1	4	5	4	3	2	1	1	2	2	2	2	2	2	2	2	2	2	2	2	2	2	2	2	2
97	2		1				2	4			1		1	2	1	2						1	1	1	1	2	2	2	2	2	2	2	2	1
98	2		1				2	4	1				1	1	1	1	3	5	2	1	2	1	1	1	1	1	2	2	2	2	2	1	2	2	2	2	2	2	2	2
99	1		1				2	4			1	1	2	3	1	1	6	7	1	1	2	1	3	2	1		2	2	2	2	2	2	2	1
100	1		1				2	4		1			2	3	3	1	5	6	5	3	2	1	1	1	1	2	1	2	2	2	2	1	2	2	2	2	2	2	2	2
101	1		1				2	4					1	2	4	1	3	6	3	2	2	1	1	1	1	1	1							1
102	2		1				1	4					1	1	1	1	5	6	3	1	2	1	1	1	1	2	3	1	2	2	1	1	1	1
103	2		1				2	4					1	2	1	1	3	5	4	2	2	1	1	1	1	2	3	2	2	1	2	2	2	2	2	2	2	2	1	2
104	2		1				2	4		1		1	1	2	2	1	6	7	2	2	2	1	1	1	1	2	3	2	1	1	2	2	2	1
105	1		1				2	4			1		1	1	1	1	1	6	1	1	2	1	4	2	2	2	2	2	2	2	2	2	2	1
106	1						2	4					2	4		1	1	4	4	4	2	4	1		1	1	1							1
107	1		1				2	4			1		2	1	3	1	1	5	5	5	2	1	1	2	1	2	1							1	2	2	2	2	2	2
108	1		1				2	4	1	1	1		1	1			1	5	5	2	2	1	1	1	1	2	1							2	2	2	2	2	2	2
109	2	1	1	1	1	INDIA MU	1					1		5	5	1	1	2	7	7	2	5	5	8	1	2	5	2	1	1	1	1	1	2	2	2	2	2	2	2
110	2		1				2	4					1	1	1	1	6	7	2	1	2	1	1	1	1	2	2	2	2	2	2	2	2	2	2	2	2	2	2	2
111	1				1	PACIFIC	2	3					1	5	3	1	2	3	3	3	2						1							2	2	1	2	2	2	2
112	1		1				2	3					4		4	1	4	5	2	2	2	2	1	3	1	1	1							2	2	2	2	2	2	2
113	1		1				2	4					1	1	1	2						1	1	1	1	2	1							1
114	2		1				2	3					1	2	3	1	3	4	2	2	2	1	1	2	1	2	1							1
115	2		1				2	1					1	3	2	1	5	3	2	1	2	1	1	1		1	2	2	2	2	2	2	2	1
116	2		1				2	4	1			1	2	2	2	1	1	5	3	2	2	1	1	2	1	2	3	1	1	2	2	2	2	3	2	2	2	2	2	2
117	2			1			2	4					1	1	1							1	1	1	1	2	2	1	2	2	2	2	2	1
118	2				1	ITALIAN	2	3	1	1	1		1	3	3	1	1	6	1	1	2	2	5	2	1	2	2	2	2	2	2	2	2	1
119	2		1				2	3	1	1			1	1		1	5	1	1	1	2	1	1	1	1	2	3	2	2	2	2	2	2	2	2	2	2	2	2	2
120	2		1				2	4					1	5	3	1	5	6	5	5	2	1	1	1	1	2	2	1	1	1	2	1	1	2	2	2	2	2	2	2
121	1		1					4					2	1	2	1		7				1	1	2	1	2	3	2	1	2	2	2	2	2	1	1	2	1	1	1
122	1			1			2	4	1	1	1		1	1	1	2						1	1	8	1	2	3	1	2	2	2	2	2	3	1	2	2	2	2	2
123	2		1				2	3		1			1	5	5	1	4	5	2	1	2	2	1	3	1	2	2	2	2	2	2	2	2
124	1		1				2	3		1	1		1	1	1	1	1	4	2	1	2	1	3	3	1	2	2	2	2	2	2	2	2	4	2	2	2	1	1	1
125	2		1				2	4					1	1	1	1	1	5	3	3	2	1	1	1	1	2	2	2	2	2	2	2	2	1
126	2		1				2	3					4	4	5	1	5	6	4	4	2		1	1	1	1	1							1
127	2		1				2	2	1	1	1	1	1	1	1	1	3	6	1	1	2	1	1	1	1	2	3	2	2	2	2	2	2	2	2	2	2	2	2	2
128	2		1				2	2	1		1	1	1	3	3	1	3	4	2	1	2	1	1	1	1	1	2	2	2	2	2	2	2	2	2	1	2	2	2	2
129	2		1		1	EUROPEAN	2	2	1	1	1	1	2	1	1	1	2	5	1	1	2	1	1	1	1	2	2	2	2	2	2	2	2	2	2	2	2	2	2	2
130	2		1				2	2		1	1		1	1	1	1	2	1				1	1	1	1	1	3	2	2	2	2	1	2	1
131	1		1				2	2	1		1		1	1	1	1	5	1				1	1	1	1	2	1							2	2	1	2	2	2	2
132	2		1				2	2	1		1		1	1	1	1	5	1				1	1	1	1	2	3	2	2	2	2	2	2	2	2	2	2	2	2	2
133	1		1				2	2	1	1	1	1	4	5	5	1	1	2	7	7	2	5	5	8	1	2	5	2	2	2	2	2	2	5	2	2	2	2	1	1
134	2		1					2			1		1	1	1	1	3	5	2	1	2	1	1	1	1	2	3	1	2	2	2	1	2	5	2	2	2	2	2	2
135	1		1				2	2	1	1	1		2	1	1	1	1	6	1	1	2	1	5	1	1	2	3	1	2	2	2	2	2	4	2	2	2	2	2	2
136	2		1				2	2					1	5	1	1	1	4	4	4	2	1	1	1	1	2	3	1	1	1	1	1	1	2	2	2	2	2	2	2
137	2		1				2	2	1	1		1	1	2	1	1	3	5	4	2	2	1	2	1	1	2	3	2	2	1	2	1	2	1
138	1			1			2	2		1			1	5	5	1	1	2	6	5	1	5
139	1		1				2	2			1		2	1	1	2						1	1	1	1	2	1							1
140	2		1				2	4	1		1		6	1	1	1	6	7	2	1	2	1	1	1	1	1	2	1	1	2	2	2	2	1	2	2	2	2	2	2
141	1	1					2	3					2	1	1	2						1	1	1	1	2	1							3	2	2	2	2	2	2
142	1		1				2	3					1	4	1	1	1	6	4	3	2	1	5	2	3	2	1							3	2	2	2	2	2	2
143	1		1				2	3		1			2	1	1	2						1	5	3	1	2	1							2	2	2	2	2	2	2
144	1						1	2	1				1	5	5	1	2	4	5	5	2	2	5	3	1	2	2	2	1	2	2	2	2	2	2	2	2	2	2	2
145	1		1				2	3		1			1	1	2	1	1	5	2	2	2	1	3	1	1	2	1							2	2	2	2	2	2	2
146	1				1	PUERTO R	1	3					1	5	5	1	2	3	4	3	2	4	1	3	1	2								4	2	2	1	1	1	1
147	1		1				2	3					1		4	1	1	2	4	3	2	2	5	3	1		2	2	2	2	2	2	2
148	1		1				2	3					1	5	4	1	2	4	5	2	2	2	1	1	1	2	2	2	2	2	2	2	2	5	2	1	2	2	1	1
149	2		1				2	3					2	1	1	1	3	6	1	1	2	1	1	3	1	1	2	2	2	2	2	2	2	1
150	1		1				2	3		1	1		1	1	2	1	1	6	1	1	2	1	1	1	1	2	2	2	2	2	2	2	2	2	2	2	2	2	2	2
151	1			1			2	3		1			2	3	3	1	1	4	6	5	2	1	2	3	1	2	2	2	2	2	2	2	2	4	2	2	2	2	2	2
152	1		1				1	4		1			1	1	2	1	1	5	1	1	2	3	1	4	1	2	1							4	2	2	2	2	2	2
153	2		1				2	4		1	1		1			1	5	6					1	1	1	2	3	2	2	2	2	2	2	2	1	2	2	2	2	2
154	1		1					3		1	1		1	1	1	1	5	6	4	3	2													1
155	1		1				2	3		1			6			1	5	2	6	2	1	2	3	6	2	2	4	1	2	1	2	1	2	3	1	2	1	2	1	2
156	2		1				2	4	1				1	2	1	1	5	7	2	2	2	1	1	2	1	2	3	1	2	2	1	1	2	1
157	2		1				2	4				1	1	2	2	1	4	5	3	1	2	1	1	1	1	2	2	2	2	2	2	2	2	1
158	2		1				2	4	1	1	1		1	1	1	1	4	5	4	3	2	1	1	1	1	2	2	2	2	2	2	2	2	1	2	2	2	2	2	2
159	2		1				2	4		1			1	3	3	1	4	3	4	3	2	1	1	1	1	2	2	2	1	1	2	2	2	1
160	1		1				2	2	1	1	1		1	1	1	1	2	5	1	1	2	1	1	1	1	1	1							1
161	2		1				2	2		1			1	1	1	1	4	5	3	3	2	1	1	1	1	2	3	2	2	2	2	2	2	1
162	1		1				2	1					1	1	1	1	3	1				1	3	1	1	1	3	2	2	2	2	2	2	3	2	2	2	2	2	2
163	2		1				2	1	1		1		1	1	1	1	3	1				1	1	1	1	2	3	2	2	2	2	2	2	1
164	2		1				2	1					1	1	1	1	4	5	2	1	2	1	1	1	1	2	2	2	2	2	2	2	2	2	2	2	2	2	2	2
165	1		1				2	1					1	2	1		1	5	1	1	2	1	3	8	1	2	3	2	2	2	2	1	2	3	1	2	1	2	2	2
166	1				1	PUERTO R	1	1		1			3	5	5	1	3	4	2	5	2	2	2	4	1	2	4	2	1	2	2	2	1	3	2	2	2	2	2	2
167	2		1				2	1		1			1	1	1	1	4	6	1	1	2	1	1	1	1	2	2	2	2	2	2	2	2	1
168	1		1				2	1		1			1	1	1	2						1	1	1	1	2	3	2	2	2	2	2	2	1
169	1		1				2	1		1	1		2	2	5	1	3	5	6	5	2	1	5	3	1	2	2	2	2	2	2	2	2	2	2	2	2	2	2	2
170	1		1				2	1		1			2	1	1	1	2	5	1	1	2	1	1	5	1	2
171	1				1	LATINO	1	1		1			3	2	1	1	5	6	2	2	2	1	1	1	1	2	1							2	1	2	2	2	2	2
172	2				1	PUERTO R	1	1	1				1	1	1	1	3	5	2	1	2	1	1	4	1	2	3	1	2	2	2	2	2	5	2	2	1	1	1	1
173	2		1				2	1	1	1			1	1	1	2						1	1	1	1	2	2	1	2	2	2	2	2	1
174	2		1				2	1					2	1	1	2						1	1	1	1	2	1							1
175	2		1				2	1				1	2	1	1	1	4	5	2	1	2	1	1	3	1	1	3	2	2	2	2	1	2	3	2	2	2	2	2	2
176	1		1				2	1					1	4	3	1	5	2	5	5	1	1	4	8	1	2
177	1		1				1	1					2	1	1	1	3	6	1	1	2	1	1	1	1	2	1							1
178	2		1				2	1					2	1		1	1	1				1	1	1	1	2	1							1
179	1		1				2	1				1	1	5	3	1	3	5	1	1	2	1	1	3	1	1								2	2	2	2	2	1	2
180	2		1				2	3	1	1	1		2	1	1	1	5	1				1	1	1	1	2	2	1	2	2	2	1	2	1
181	1		1				2	1		1			1		1	2						1	1	1	1	2	3		2	2	2	2	2	3	1	1	2	2	2	2
182	1		1				2	1					1	1	1	1	4	1				1	3	3	2	2	4	2	1	2	2	2	2	2	2	1	2	2	2	2
183	2						2								3	1	3	4	2		2	2	1	2	1	2	3	2	2	2	2	2	2	3	2	2	2	2	2	2
184	2						2	1	1				2	1								1	1	1	1	2	3	2	2	2	2	2	1	2	2	2	2	2	2	1
185	1		1					2		1			1
186	1		1					4		1	1		1	1	1	2						1	1	1	1	2	1							3	2	2	2	2	2	2
187	1	1					2	3		1			5	1	2	1	4	1	1	1	2	1	1	1	1		2	2	2	2	2	1	2	3	2	2	2	2	1	2
188	1		1				2	2					6	1	1	1	3	6	1	1	2	1	1	1	1	2	1							2	1	2	2	2	1	2
189	1	1			1	CAPE VER	2	2			1		1	1	1	1	2	6	1	1	2	1	1	1	1	2	3	2	2	2	2	2	2	5	2	2	2	2	1	2
190	1				1	ASIAN AM	2	3			1	1	1	1	1	1	5	6	2	1	2	1	1	1	1	2	2	2	2	2	2	2	2	4	1	1	2	1	1	2
191	1		1				2	3		1			1	1	1	1	5	1				1	1	1	1	2	1							3	2	2	2	2	2	2
192	1		1				2	3	1		1	1	1	1	1	1	1	3	1	1	2	1	4	8	1	2	2	2	2	2	2	2	2	1
193	1		1				2	2		1		1	1	3	3	1	4	5	4	3	2	1	1	2	1	2	1							3	2	1	2	1	1	2
194	2		1				2	2					2	1	1	1	5	6	2	1	2	1	1	1	1	2	3	2	2	2	2	2	2	2	2	2	2	2	2	2
195	1		1				2	2					2	1	2	2						1	1	1	1	2	1							5	1	2	2	2	2	2
196	1		1				2	2					1	3	1	1	4	5	4	2	2	1	1	1	1	2	2	2	2	2	2	2	2	2	2	2	2	2	2	2
197	2				1	SPANISH	1	2		1			1	1	1	1	2	6	3	2	2	1	1	1	1	2	4	2	2	2	2	2	2	1
198	2		1				2	2		1			2	1	1	1	4	5	3	2	2	1	1	1	1	2	2	2	2	2	2	2	2	2	2	2	2	2	2	2
199	2		1				2	2		1			1	3	1	2						1	1	2	1	2	1							2	1	1	2	2	2	2
200	1		1				2	2			1		1	2	1	1	2	4	2	1	2	1	1	1	1	2	1	1	1	1	1	1	1	3	1	1	1	1	1	1
201	1		1				2	2		1			1	1	1	1	5	6	2	1	2	1	1	1	1	2	2							4	2	1	1	2	1	1
202	1		1				2	2	1	1			1	5	2	1	4	5	4	4	2	1	5	1	1	2	1							3	1	2	2	2	1	1
203	2		1				2	2		1			1	1	1	2						1	1	1	1	2	2	2	2	2	2	2	2	2	2	2	2	2	2	2
204	1		1				2	4	1	1	1		1	1		1	2	5	3	3	2	1	1	2	1	2	2	2	2	2	2	2	2	2	2	2	2	2	2	2
205	1		1				2	4		1	1		1	1	1	1	5	1				1	1	8	4	2	2	2	2	2	2	2	2	1
206	1		1				2	4		1			1	1	1	1	4	1				1	1	2	1	2	2							3	1	2	2	2	2	2
207	1		1				2	4		1	1		2	1	1	1	5	7	2	2	2	1	1	8	1	2	3	2	2	2	2	2	2	5	2		1	1	1	1
208	2		1				2	4	1	1	1		1	1		1	1	1				1	1	1	1	2	2	1	2	2	2	1	2	1
209	2		1				2	4		1	1		2	2	1	1	3	5	1	1	2	1	1	1	1	2	1	2						1
210	2		1				2	2	1	1			1	1	1	1	1	1				1	1	1	1	2	2	2	2	2	2	2	2	1
211	2		1				2	2		1	1		1	1	3	1	2	5	2	2	2	1	1	2	1	2	2	2	2	1	2	2	2	2	2	2	2	2	2	2
212	1		1				2	2				1	1	1	1	1	1	1				1	1	1	1	2	2	2	2	2	2	2	2	2	2	2	2	2	2	2
213	2		1				2	2	1	1	1	1	1	1	2	1	4	6	4	3	2	2	1	1	1	1	2	2	2	2	2	2	2	2	2	2	2	2	2	2
214	2		1				2	2	1	1	1		2	2	2	2						2	5	1	1	2	2	1	1	2	2	2	2	2	1	2	2	2	2	2
215	2				1	HISPANIC	1	2	1	1	1		1	1	1	1	2	6	1	1	2	1	1	1	1	2	1							2	2	2	2	2	2	2
216	2		1				2	2		1			2	5	4	1	1	4	4	4	2	1	1	3	1	2	2	2	2	2	2	2	2	1
217	2		1				2	2		1			1	1	1	2						1	1	1	1	2	1							1
218	2			1			2	2					1	1	1	1	3	1	1	1	2	1	1	1	1	2	1	2	2	2	2	2	2	1	2	2	2	2	2	2
219	2		1				2	2		1	1	1	1	2	1	1	4	6	1	1	2	1	1	1	1	2	2	1	2	2	2	2	2	2	1	1	2	2	1	1
220	1		1				2	1		1		1	1	1		1	1	3	4	2	2	1	1	4	1	2	1	2	2					3	2	1	2	2	2	2
221	1		1				2	1		1			1	4	4	1	2	4	1	1	2	2	5	1	1	2	1							2	2	2	1	2	2	2
222	1		1				2	1	1	1			1	2	3	1	3	5	2	1	2	1	2	2	1	2	2	2	2	2	2	2	2	2	2	2	2	2	2	2
223	1		1				2	1		1			1	1	1	2						1	1	1	1	2	1	2	2					2	1	2	2	2	2	2
224	2				1	HISPANIC	1	1					1	1	1	1	2	4	1	1	2	1	1	3	1	2	2	2	1	2	2	2	2	2	2	2	2	2	2	2
225	1		1				2	3		1			2	2	1	1	1	5	4	4	2	1	2	1	1	2	2	1	1	1	2	2	2	3	2	2	2	2	2	2
226	1		1				2	3	1		1		1	1	1	2						1	1	1	1	2	1							3	2	2	2	2	1	1
227	2		1				2	3	1		1		1	3	2	1	3	5	5	4	2	1	1	1	1	1	2	2	2	1	2	2	2	1
228	2		1				2	3		1			1	1	3	1	3	4	4	3	2	1	1	1	1	2	4	2	1	1	2	2	2	1
229	1	1					2	3					2	1	3	1	5	6	5	4	2	1	1	1	1	2	2	2	2	2	2	2	2	2	2	2	2	2	2	2
230	1		1				2	3				1	1	1	1	1	4	5	1	1	2	1	2	1	1	2	2	2	2	1	2	2	2	2	2	2	1	2	2	2
231	2		1				2	3	1		1		2	1	1	1	5	1				1	1	1	1	2	2	1	2	1	2	1	2	2	2	2	1	2	2	2
232	1		1				2	3					1	1	1		3	1	1	1	2	1	1	1	1	2	1							3	2	2	2	2	2	2
233	2		1				2	3				1	2	3	1	1	1	3	2	2	2	1	1	1	1	1	3	1	1	2	1	1	1	1
234	2				1	PUERTO R	1	3	1	1			2	1	1	1	4	6	2	2	2	1	2	1	1	2	4	1	1	2	1	1	2	1
235	1		1				2	2		1	1	1	1	1	1	1	1	5	1	1	2	1	1	1	1		2	2	2	2	2	2	2	3	2	1	2	2	1	2
236	2		1		1	NATIVE A	2	2		1			2	2	1	1	3	5	1	1	2	1	3	3	1	1	3	2	2	2	2	2	2	1
237	2		1				2	2		1			1	2	3	1	1	5	3	2	2	1	1	1	1	2	3	2	2	2	2	1	2	2	2	2	2	2	2	2
238	1		1		1	LEBANESE	2	2	1	1			1	1	1	1	2	5	1	1	2	1	1	2	1	2	1							2	1	1	2	2	2	2
239	1				1	HISPANIC	1	2					2	1	1	2						1	1	1	1	2	1							5	1	1	2	1	1	2
240	1		1				2	1	1				1	1	3	1	4	5	2	1	2	1	1	2	1	2	1							4	2	2	2	2	2	2
241	2		1				2	1		1			2	1	1	1	3	1				1	1	1	1	2	2	2	2	2	2	2	2	1
242	2		1				1	1		1		1	1	1	1	1	3	1				1	1	3	1	2	2	2	2	2	2	2	2	1
243	2		1				2	1	1	1			1			1	4	5	2	1	2		1	1	1	2	2	2	2	2	2	2	2	2	2	2	2	2	2	2
244	1		1				2	1					1	1	1	2						1	2	2	1	1	1	2	2	2	2	2	2	2	2	2	2	2	2	2
245	2		1				2	1	1			1	1	1	1	1	3	1				1	1	1	1	1	1							2	2	1	2	2	2	2
246	2		1				2	1		1			1	1	1	1	1	1				1	1	1	1	2	2	2	2	2	2	2	2	2	2	2	2	2	2	2
247	1		1				2	3	1				6	3	3	1	5	6	5	5	2	1	1	1	1	2
248	1		1				2	3					2	2	2	1	3	4	7	5	2	1	5	1	1	2	2	2	2	2	2	2	2	1
249	1		1				2	3	1				2	1								1	1	1	1	1	1							5	2	1	1	1	1	1
250	1				1	PHILIPPI	1	3		1			1	1										1	1		1							1
251	1		1				2	3	1			1	2	1	4	1	2	4	5	3	2	3	1	2	1	2	2	2						3	2	2	2	2	2	2
252	2		1				2	4					1	3	4	1	5	6	1	1	2	1	1	1	1	2	1							1
253	2		1				2	3					1	2	1	1	5	6	5	4	2	1	1	3	1	1	3	2	1	1	2	2	2	2	2	2	2	2	2	2
254	1		1					3					2	5	5	1	4	5	5	4	2	5	5	8	1	2	1							1
255	1		1				2	4					1	1	1	1	2	6	1	1	2	1	1	2	1		2	1	2	2	2	2	2	1	2	1	2	2	1	2
256	1	1	1				2	3					1	2	2	1	1	5	2	2	2	1	1	1	1	1	1	2						1
257	2		1				2	4			1		1	1	1	1	4	6	1	1	2	1	1	1	1	2	3	1	2	2	2	2	2	2	2	2	2	2	2	2
258	2		1				2	4		1			1	2	1	1	3	6	4	3	2	1	1	1	1	2	1							2	2	2	2	2	2	2
259	2		1				2	4		1			1	2	3	1	4	5	5	4	2	1	1	1	1	2	2	2	1	2	2	2	2	1
260	1		1				2	3	1	1	1		1	1	2	1	1	6	1	1	2	1	1	1	1	2	2	2	2	2	2	2	2	2	2	2	2	2	2	2
261	2		1				2	4	1				1	5	4	1	4	6	2	1	2	4	1	3	1	2	1							1
262	1		1				2	4					1	1	2	1	6	7	1	1	2	1	1	1	1	1	1							1
263	1		1				2	3		1	1		1	1	1	1	4	1				1	1	1	1	2	2	2	2	2	2	2	2	2	2	2	2	2	2	2
264	1		1				2	4				1	1	1	1	1	1	5	2	1	1	1	1	1	1	2	1							2	2	2	2	2	2	2
265	2		1				2	2					1	5	5	1	4	5	2	2	2	2	1	1	1	2	1	2	2	2	2	2	2	2	2	2	2	2	2	2
266	2		1				2	1		1			1	1	1	1	2	5	1	1	2	1	1	2	1	2	2	2	2	2	2	2	2	2	1	1	1	2	2	2
267	2		1				2	2		1			1	1	1	2						1	1	1	1	2	2	2	2	2	2	2	2	2	2	2	2	2	2	2
268	1		1				2	2		1			1	2	3	1	1	4	4	3	2	1	1	6	1	1	1							1
269	1		1				2	1		1			1	2	1	1	2	4	2	1	2	1	1	1	1	2	2	2	2	2	2	2	2	2	2	2	2	2	2	2
270	2		1				1	1		1		1	1	1	1	1	1	1				1	1	1	1	2	3	2	2	2	2	2	2	1
271	1		1				2	1				1	1	1	1	2						1	1	1	1	2	1							3	2	2	2	2	2	2
272	2		1				2	1		1	1		1	1	1	1	1	5	2	1	2	1	1	3	1	2	2	2	2	2	2	1	2	2	2	2	2	2	2	2
273	1		1				2	1			1		1	1	1	1	2	5	2	1	2	1	1	2	1	2	2	2	2	2	2	2	2	2	2	2	2	2	2	2
274	2		1				2	1	1	1		1	2	1	1	1	4	1				1	1	1	1	1	2	1	2	2	2	1	2	1
275	2		1				2	1	1				2	2	4	1	3	5	1	1	2	1	1	3	1	2	3	2	2	2	2	2	2	1
276	1		1				2	1		1			1	5	4	1	4	5	5	5	2	1	5	4	1	2	2	2	2	1	2	2	2	2	2	2	2	2	2	1
277	2	1					2	4			1		1	1	1	1	6	1				1	1	1	1	2	2	2			2			1
278	2		1				2	1					1	1	1	1	1	1				1	1	1	1	2	1							1
279	1		1				2	1	1	1		1	1	1	1	1	2	1	1	1	2	1	1	1	1	2	1							2	2	2	2	2	2	2
280	2		1				2	3			1		2	5	4	1	2	3	5	4	1	2	1	1	1	2	1	2	2	2	2	2	2	1
281	1		1				2	4	1				2									5	1	1	1	2	1							2	1	2	2	2	2	2
282	2		1				2	2				1	1	2	4	1	4	5	4	2	2	1	1	1	1	2	2	2	2	1	2	1	2	1
283	2		1				2	2					1	2	1	1	3	5	1	1	2	1	1	1	1	2	3	2	2	1	2	1	2	1
284	2		1				2	2		1			1	2	3	1	4	5	3	2	2	1	1	1	1	2	1	2	2	2	2	2	2	1
285	1		1				2	1		1			1	1	1	1	4	5	1	1	2	1	2	1	1	2	2	2	2	2	2	2	2	3	2	2	2	2	2	2
286	2		1				2	1	1	1			1	1	1	2						1	1	1	1	2	2	2	2	2	2	2	2	1
287	2		1				2	1		1			1	2	2	1	5	6	2	1	2	1	1	1	1	2	3	2	2	2	2	2	2	1	2	2	2	2	2	2
288	1		1				2	1		1			1	4	2	1	4	5	1	1	2	1	1	4	1	2	3	2	2	2	2	2	2	3	2	2	2	2	2	2
289	1		1				2	1					1	3	5	1	4	5	2	1	2	1	1	2	1	1	1	2	2	2	2	2	2	3	2	2	2	2	2	2
290	2		1				2	1		1			1	4	3	1	3	2	4	3	1	1	1	3	1	1	2	2	1	2	2	2	2	1
291	1		1				2	1			1		1	1	1	2						1	1	1	1	2	2	2	2	2	2	2	2	2	1	2	2	2	2	2
292	2		1				2	1	1				1	4	4	1	3	5	1	1	2	2	1	1	1	2	2	2	2	1	2	2	1	1	2	2	2	2	2	2
293	1		1				2	1		1			2	5	4	1	2	3	7	6	1	2	5	4	4	2	2	2	2	2	2	2	2	1
294	2		1				2	1					1	1	1	1	2		1			1	1	1	1	2	1							1
295	2				1	PUERTO R	1	3			1		1	2	3	1	4	5	3	3	2	1	1	2	1	2	2	1	2	2	2	1	1	1
296	2		1				2	3		1			1	1	1	1	5	6	2	1	2	1	1	1	1	2	1							1
297	2		1				2	3		1			1	3	5	1	3	5	3	4	2	2	1	1	1	2	3	2	1	2	2	2	2	1
298	1		1				2	3			1		1	1	1	1	2	1				1	2	1	1	2	2	2	2	2	2	2	2	5	2	2	2	1	1	1
299	2		1				2	4	1		1		1	1	1	1	2	7	3	2	2	1	1	1	1	2	3	1	2	2	2	1	2	1
300	2		1				2	4	1	1	1		1	1	1	1	5	1				1	1	1	1	2	2	1	2	2	2	1	2	1
301	1		1				2	4					1		4	1	1	4	1	1	1	3	5	1	1	2	1							4	1	2	2	2	2	2
302	2				1	SPANISH	1	3	1	1			2	5	3	1	2	5	3	2	2	1	1		1	2		1	1	2	2	1	2	1	2
303	2		1				2	3	1				2	2		1	2	1	1	1	2	1	1	2	2	1	2	2	2	2	2	2	1	1
304	2		1				2	3			1		6	1	1	1	5	1	1	1	2	1	1	1	1	2	3	2	1	2	2	2	2	2	2	2	2	2	2	2
305	2		1				2	3					2	2	5	1	2	5	2	1	2	2	1	1	1	1	2	2	2	1	2	2	2	1
306	2		1		1	ARABIC	2	3	1	1	1	1	1	5	2	1	4	5	4	1	2	1	1	1	1	1	2	2	2	2	2	2	2	1
307	1		1				2	3		1	1		1	1	1	2						1	1	1	1	2	2	2	2	2	2	2	2	2	2	2	2	2	2	2
308	1		1				2	3	1				1	1	1	2						1	1	1	1	2	3	2	1	1	1	1	1	5	2	1	1	2	1	1
309	2		1				1	4		1	1		1	2	1	1	2	5	1	1	2	1	1	2	1	1	2	2	2	1	2	1	2	1
310	2			1			2	3				1	3	2	1	2						2	1	2	1	1	3	1	1	1	2	2	2	5	1	1	2	1	2	2
311	1		1				2	1					1	1	1	1	1	1				1	1	1	1	1	3	2	2	2	2	2	2	1
312	1		1				2	1					2	1	1	1	2	3	1	1	2	1	4	3	1	2	2	2	2	2	2	2	2	2	2	2	2	2	2	2
313	1		1				2	1		1			1	1	1	1	5	1	2	1	2	1	2	1	1	2	2							2	2	2	2	2	2	2
314	1		1				2	1		1			1	1	2	1	5	6	1	1	2	1	1	2	1	2	1							1
315	1		1				1	3					2	2	3	1	5	6	1	1	2	1	2	1	1	2		2	2	2	2	2	2	1
316	1		1				2		1				4	1	1	1	1	2	6	2	1	3	3	3	4	1	2	1	1	1	2	1	1	1	1	2	2	1	1	1
317	2		1				2	3		1			1	2	2	1						1	1	1	1	2	2							2
318	1		1				2	3					3	5	1	2	1	1	1	1		1	1	1	1	1
319	1		1					3		1			1		5	1	2	4	4	4	2	4	2	2	2	2	1							1
320	2		1				2	3		1			2	5	3	1	3	4	2	1	2	1	1	1	1	1	2	2	2	2	2	2	2	1	2	2	2	2	2	2
321	1		1				2	3					1	3	3	1	1	5	3	2	2	1	1	1	1	2								1
322	1		1				2	3					2		5	1	1	4	5	5	2	3	2	1	1	2	1							1
323	1		1				2	4					1	4	5	1	1	3	5	5	1	3	5	8	4	1	1							2	1	2	2	2	2	2
324	1		1				2	3					1	5	5	1	1	4	1	1	2	3	1	2	1	2	1							4	2	2	2	2	2	2
325	2		1				2	3		1			1	3	4	1	4	5	1	1	2	2	2	2	1	1	4	2	2	2	2	2	2	1
326	2		1				2	3	1		1		2	1	1	1	3	6	2	1	2	1	1	1	1	2	2	2	2	2	2	2	2	2	2	2	2	2	2	2
327	2				1	HISPANIC	1	3					2	1	1	1	4	5	2	1	1	1	1	1	1	1		2	2	2	2	2	2	2	2	2	2	2	2	2
328	1		1				2	3		1			1	1	1	2						1	1	1	1	2	1							5	2	2	2	2	2	2
329	2		1				2	3	1	1	1	1	1	1	1	1	5	6	1	1	2	1	1	1	1	1	2	1	1	2	2	1	1	1	2	2	2	2	2	2
330	2	1	1				2	3	1		1	1	1	1	1	1	2	1				1	1	1	1	1	2	2	2	2	2	2	2	1
331	1		1				2	3					1			1	4	5	4	3	2	1	1	2	1	2	2	2	2	2	2	2	2	2	1	2	1	2	2	2
332	2		1				2	3			1	1	1	1	1	1	1	1				1	1	1	1	2	2	2	2	2	2	2	2	2	2	2	2	2	2	2
333	2		1				2	3	1		1		1	1	1	1	5	6	3	2	2	1	1	1	1	2	3	1	2	2	2	1	2	1
334	1				1	PAKISTAN	2	3	1	1	1		1	2	3	1	5	6	2	1	2	1	1	2	1	2	3	2	2	2	2	2	2	1
335	1		1				2	4		1			1	1	3	1	3	5	2	3	1	1	3	5	2	2	1							2	2	1	2	1	1	2
336	1		1				2	4					1	2	2	2	3	6	4	3	2	1	5	3	1	2
337	1		1				2	4		1			2	3	1				5	3	2	1	1	1	1	2	2	2	1	2	2	2	2	2	2	2	2	2	2	2
338	2				1		1	4					1	5	3	1	3	4	5	3	2	3	1	3	2	2	3	2	2	1	2	1	1	1
339	1		1				2	4					2	1	5	1	2	3	6	1	1	2	5	3	1	2	2							2	2	2	2	2	2	2
340	1		1				2	3					1	2	3	1	1	4	5	1	2	1	5	8	4	2	2	2	2	2	2	2	2	3	2	2	1	2	2	2
341	1		1				2	3					1	3	5	1	5	2	7	6	1	5	5	5	5	1
342	1		1				2	4					1	1	1		5	1				1	1	1	1	2	1							1
343	1			1			2	1		1			1	2	1	2						1	1	4	1	2	2	1	2	2	2	2	2	3	1	1	2	2	1	2
344	1		1				2	1		1		1	1	5	5	1	4	6	1	1	2	1	2	2	1	2	1							1
345	1		1				2	1		1			1	1	1	2						1	1	1	1	2	1							1
346	2		1				2	1					1	1	3	1	1	5	3	2	2	1	1	2	1	1	2	1	2	2	2	2	2	2	2	2	2	2	2	2
347	2		1				2	1					1	1	1	1	2	5				1	1	1	1	2	4	2	2	1	2	2	2	2	2	2	2	2	2	2
348	2		1				2	1		1			1	1	1	1	4	5	1		2	1	1	3	2	1	3	2	2	2	2	2	2	1
349	2				1	CAPE VER	2	1		1			1	1	1	1	3	1				1	1	1	1	2	2	2						2	2	2	2	2	2	2
350	2		1				2	1		1			2										1	1	1
351	2	1	1				2	4	1	1	1		2	1	1	1	5	1				1	1	1	1	2	2	1	2	2	2	2	2	1
352	1		1				2	4		1			1	1			4	5	5	5	2	1	3	1	1	2	1							2	2	2	2	2	2	2
353	1		1				2	1					1	2	2	1	1	5	1	1	2	1	3	1	1	2	2	2	2	2	2	2	2	2	1	1	2	2	1	2
354	1		1				2	1			1		1	1	1	1	4	5	2	1	2	1	1	4	1	2	3	1	1	1	2	2	2	3	1	1	2	2	2	2
355	2		1				2	1	1		1	1	1	2	1	1	1	5	1	1	2	1	1	1	1	2	2	2	2	2	2	2	2	1
356	1		1				2	1		1			1	1	1	1	5	6	1	1	2	1	1	1	1	2	1	2						1
357	2		1				2	1		1			1	1	1	2						1	1	1	1	1	3	2	2	2	2	1	2	4	2	2	1	2	2	1
358	2		1				2	1		1		1	1	1	1	1	5	1	1	1	2	1	1	1	1	2	1	2	2	2	2	1	2	2	2	2	2	2	2	2
359	1		1				2	1			1		1	1	1	1	4	1				1	1	1	1	1	1							2	1	1	2	2	2	2
360	2		1				2	2		1	1		1	1	1	1	5	6	1	1	2	1	1	1	1	2	2	2	1	2	2	2		1
361	1		1				2	2					1	2	3	1	4	6	2	1	2	1	4	1	1	2	1							1	2	2	2	2	2	2
362	2		1				2	2		1			1	1	5	1	1	6	5	4	2	1	3	1	1	2	3	2	2	2	2	2	2	1
363	1		1				2	2					1	1		1	3	5	3	2	2	1	1	2	1	2	2	2	2	2	2	2	2	2	2	2	2	2	2	2
364	2		1				2	2					1	2	3	1			1	1	2	1	1	1	1	2	3	2	2	1	2	2	2	1
365	2		1					1					1	1	1	1	3	5	1	1	2	1	1	1	1	1	1	2	2	2				1
366	1		1				2	1		1			1	1	1	2						1	3	1	1	2	1							3	2	1	2	2	2	2
367	1		1				2	1		1		1	1	1	1	2						1	1	3	1	2	1							2	2	2	2	2	2	2
368	1		1				2	1				1		1	1	2	1	1				1	1	1	1	2	2	2	2	2	2	2	2	3	2	2	2	2	2	2
369	2		1				2	1		1				1	1	1	4	5		1	2	1	1	1	1	2	4	2	1	2	2	2	2	2	2	2	2	2	2	2
370	2		1				2	1		1			2	2	1	1	4	5	1	1	2	1	1	1	1	2	3	2	2	2	2	1	2	2	2	2	2	2	2	2
371	1		1				2	1					1	1	1	1	3	1				1	1	3	1	2	2	2	2	2	2	2	2	4	2	1	2	2	2	2
372	2		1				2	1					2	1	1	1	3	1				1	1	2	1	2	3	2	2		2	2	2	1
373	1		1				2	4					1	5	5	1	2		6	4	1	2	4	2	1	2	1							1
374	2		1				2	3	1				2	1	1	1	6	1				1	1	1	1	2	2	2	2	2	2	2	2	1
375	1		1				2	2					2	1		1	4	5	2	1	2	1	3	1	1	2	1							2	2	2	2	2	2	2
376	1		1				2	4		1			1	1	2	1	5	6	4	3	2	1	1	3	1	2	2	2	2	2	2	2	2	1
377	1				1	HISPANIC	1	1		1			1	3	3	1	2	4	3	2	2	1	1	3	1	2	3	2	2	2	2	2	2	2	2	2	2	2	2	2
378	2		1				2	1		1			2	1	4	1	2	5	3	2	2	1	1	1	1	2	4	2	1	1	2	2	1	2	2	2	2	2	2	2
379	2		1				2	1	1		1	1	2	1	4	1	2	4	3	1	2	1	1	1	1	1	3	1	2	2	2	2	1	2	2	2	2	2	1	2
380	2		1				2	2					1	1	1	1	4	5	1	1	2	1	1	1	1		1							1
381	2		1				2	2					1	5	5	1	3	5	2	1	2	1	1	1	1	2	2	2	2	2	2	2	2	3	2	2	2	2	2	2
382	1		1				2	2		1			1	3	4	1	4	5	4	1	2	1	2	3	1	1	3	2	2	1	2	2	2	2	1	1	2	2	2	1
383	1		1				2	2	1	1	1		1	1	1	2						1	1	2	1	2	2	2	2	2	2	2	2	3	2	2	2	2	2	2
384	2		1				2	2	1	1	1		1	1	1	1	4	1	1	1	2	1	1	1	1	1	2	1	2	2	2	2	2	1
385	1		1				2	4		1			1	3	4	1	1	4	5	5	2	1	5	1	1	2	1							2	2	2	2	2	2	2
386	1		1	1	1		2	3		1			1	1	1	1	4	1				1	1	1	1	2	2	2	2	2	2	2	2	2	1	1	2	2	2	2
387	1		1				2	3		1	1		2	1	1	1	4	1				1	1	1	1	2	1							2	1	1	2	2	2	2
388	1		1				2	3		1	1		1	1	1	1	6	7	1	1	2	1	1	1	1	2	1							4	2	2	2	2	2	2
389	2		1				2	3		1			1	1	1	1	3					1	1	4	1	2	4	2	1	1	1	1	1	1
390	2		1				2	3	1			1	1	1	1	1	5	6	2	1	2	1	1	1	1	2	2	2	2	2	2	2	2	2	2	2	2	2	2	2
391	2		1				2	3			1		1	1	1	1	3	1	1	1	2	1	1	3	2	2	4	2	1	2	1	1	1	1
392	2				1	HISPANIC	1	3	1		1		1	1	1	1	4	1				1	1	1	1	1	3	2	1	2	2	1	1	1
393	1		1				2	1					1	3	5	1	2	6	3	3	2	1	5	1	1	2	1							1
394	2		1				2	1		1			1	1								1	1	1	1	2	3	2	1	1	1	1	1	2	2	2	2	2	2	2
395	1		1				2	2					1	1	3	1	3	5	2	2	2	1	1	3	1	2	1							3	2	2	2	2	1	2
396	1		1				2	2		1			1	4	4	1	4	5	4	3	2	1	1	1	1	2	1							2	2	2	2	2	2	2
397	2		1				2	2	1	1	1		1	1	1	1	4	1				1	1	1	1	2	3	2	2	2	2	2	1	1
398	2		1				2	2	1	1			1	5	4	1	4	6	5	3	2	1	1	2	2	2	3	2	1	2	1	1	1	1
399	1		1				2	2		1			1	1	4	1	1	5	2	1	2	1	1	2	1	2	2	2	2	2	2	2	2	5	2	1	2	2	1	1
400	1		1				2	2					1	4	4	1	4	5	5	3	2	1	5	1	1	2	2	2	2	2	2	2	2	5	2	1	1	1	1	1
401	1		1				2	2	1	1	1	1	1	1	1	1	5	6	1	1	2	1	1	1	1	2	2	2	2	2	2	2	2	2	2	2	2	2	2	2
402	1	1	1				2	2	1		1	1	2	2	1	1	5	6	2	1	2	1	1	1	1	2	1							1
403	2		1				2	2					2	1	1	2						1	1	1	1	2	2	2	2	2	2	2	2	1
404	2			1			2	2				1	1	1	1	1	4	1				1	1	1	1	2	4	2	1	2	2	2	2	2	2	2	2	2	2	2
405	1				1	PUERTO R	1	1		1			1
406	1		1				2	1				1	2	4	4	1	1	5	3	2	2		5	3	1	2
407	1		1				2	1					1	4	3	1	2	4	2	2	2	1	5	3	1	2	1							3	2	2	2	2	2	2
408	1		1				2	1		1	1	1	1																					2	2	1	1	1	2	1
409	1		1				2	3		1	1		1	1	1	1	1	4	2	2	2	1	1	1	1	2	1							2	2	2	2	2	2	2
410	1		1				2	2	1	1			1
411	2		1				2	1		1	1		2	2	2	1	2	4	1	1	2	1	1	1	1	2	3	2	2	2	2	2	1	1
412	1		1				2	2				1	1	3	5	1	4	4	3	3	2	5	5	8	5	2	5	2	2	2	2	1	2	2	2	2	2	2	2	2
413	1		1				2	1		1			1	1	1	1	3	6	1	1	2	1	1	4	2	1	2	2	2	2	2	2	2	1
414	1	1	1				2	1		1		1	2	1
415	1		1				2	2		1			1	1	2	1	4	6	1	1	2	1	1	3	1	2	1							5	2	1	1	2	1	1
416	1		1				2	3					1	1	1	1	5	6	4	4	2	1	5	1	1	2	1							2	2	2	2	2	2	2
417	1		1				2	3					1	1	1	1	5	6	2	2	2	1	1	1	1	2	1							2	2	2	1	2	2	2
418	1		1				2	3	1	1	1		1	1	1	1	3	5	2	2	2	1	1	3	1	2	2	2	2	2	2	2	2	3	2	2	2	2	2	2
419	2		1				2	4					2	1	1	1						1	1	1	1		1	1	1	1	1	1	1	1	1	1	1	1	1	1
420	1		1				2	2		1			1
421	2		1				2	2		1			1	1	1	1	4	1	1	1	2	1	1	1	1	2	2	2	2	2	2	2	2	1
422	2		1				2	2					1	2	4	1	4	5	4	4	2	1	1	1	1	2	3	2	2	1	2	1	1	1
423	2		1				2	2					1	3	3	1	3	4	5	5	2	1	1	2	1	2	2	2	2	2	2	1	2	1
424	2		1				2	2	1				2	2	3	1	4	5	4	3	2	1	1	2	1	2	2	1	1	2	2	2	1	1
425	1		1				2	3		1		1	1	4	2	1	3	4	1	1	2	1	5	1	1	1	3	2	2	2	2	2	2	2	2	2	2	2	2	2
426	2				1	PUERTO R	1	3		1			1	2	2	1	1	5	1	1	2	1	1	2	1	2	2	2	2	2	2	2	2	1
427	2		1				2	3					2	3	2	1	4	5	1	1	2	1	1	1	1	2	4	1	1	1	1	1	1	1
428	1				1	EUROPEAN	2	3					2	1	1	2						1	1	1	1	2	2	2	2	2	2	2	2	4	1	1	2	2	1	1
429	1				1		2	1		1	1		1	1	1	2			1	1	2	1	1	1	1	2	1	2		2	2	2	2	1
431	2		1				2	3					2	5	2	1	5	6	3	3	2	1	1	1	1	1	2	2	2	2	2	2	2	1
432	1				1	HISPANIC	1	1					1	1	1	1	4	1				1	1	1	1	2	1							2	1	1	2	2	2	2
433	1		1				2	4		1		1	1	2	2	1	3	4	3	2	2	1	1	1	1	2	2	2	2	2	2	2	2	3	2	2	2	2	2	2
434	2		1				2	3				1	1	1	1	1	4	1	1	1	2	1	1	1	1	2	1	2	2	2	2	2	2	1	2	2	2	2	2	2
435	1		1				2	1		1			1	5	1	1	5	6	3	3	2	1	5	5	1	2	2							2	2	2	2	2	2	2
436	2		1				2	1	1	1			1	1	1	1	4	1				1	1	1	1	2	3	2	2	2	2	1	2	1
437	1		1				2	1	1				1	4	1	1	2	1				1	1	1	1	2	1							2	2	2	2	2	2	2
438	1		1				2	1		1			2	1		2					2	1	1	1	1	2								2	2	2	2	2	2	2
439	2		1				2	1		1			1	1	1	2						1	1	1	1	2	5	1	1	2	2	2	2	2	2	2	2	2	2	2
440	1				1	BLACK &	1	1		1			3	1		1							1	8	1	2
441	1		1				2	3	1		1		1	1	1	1	1	2	2	1	2	1	1	1	1	2	2	1	2	2	2	2	2	1
442	2		1				2	1	1	1			1	1	1	1	1	5	1	1	2	1	1	1	1	2	3	2	1	2	2	2	2	1
443	2		1				2	1		1			1	1	1	1	2	4	1	1	2	1	1	1	1	2	2	2	2	2	2	2	2	2	2	2	2	2	2	2
444	1		1				2	3	1				1	2	3	1	1	5	2	2	2	1	1	1	1	2	2	2	2	2	2	2	2	5	2	1	2	2	1	1
445	2		1				2	3		1			1	5	5	1	2	4	4	4	2	3	1	2	1	2	1							1
446	2		1				2	3					1	5		1	3	5	5	5	2	3	1	2	1	2	3	2	2	1	2	2	2	1
447	1		1				2	3					1	1	1	2						1	1	1	1	2	1							2	2	2	2	2	1	2
448	1		1				2	3		1			1	1	3	1	1	2	1	1	2	1	2	1	1	2	2	2	2	2	2	2	2	3	1	1	2	2	2	2
449	2		1				2	3					1	1	2	1	3	4	5	5	2	1	1	1	1	2	2	2	2	1	2	2	2	2	2	2	2	2	2	2
450	2		1				2	3					1	1	2	1	3	4	5	5	2	1	1	1	1	2	2	2	2	1	2	2	2	2	2	2	2	2	2	2
451	1		1				2	3		1	1		1	1	3	1	3	5	3	3	2	1	1	3	1	2	2	2	2	2	2	2	2	1
452	2		1				2	3	1		1		1	1	1	1	4	5	3	3	2	1	1	1	1	2	3	2	1	1	2	2	2	1
453	1			1			2	3		1			1	1	1	1	2	6	1	1	2	1	1	2	1	1	2	2	1	2	2	2	1	2	2	2	2	2	1	1
454	2			1			2	3					1	1	1	1	5	6	1	1	2	1	1	1	1	2	3	2	2	2	2	2	2	1
455	1		1				2	1		1	1		1	1	1	1	4	1				1	1	2	1	2	2	2	2	2	2	2	2	1
456	1		1				2	3		1	1		1	1	1	1	3	6	1	1	2	1	1	1	1	2	1							2	2	1	2	2	2	2
457	2		1				2	3					4	5	5	1	4	5	2	1	2	3	1	1	1	2	3	2	2	2	2	2	2	2	2	2	2	2	2	2
458	2		1				2	3					1	2	1	1	4	5	4	3	2	1	1	1	1	2	3	1	2	2	2	2	2	1
459	2		1				2	3					1	1	1	1	1	4	3	2	2	2	1	2	1	2	2	1	1	1	2	1	1	1
460	1		1				2	3		1			1	1			4	5	4	2	2	1	5	4	1	2	2	2	2	2	2	2	2	1
461	2	1					2	3		1	1		1	3	3	1	3	5	3	4	2	2	1	1	1	2	3	2	1	2	2	1	2	2	2	2	2	2	2	2
462	2		1				2	3	1		1	1	1	1	1	1	1	1				1	1	1	1	1	1							2	2	2	2	2	2	2
463	2		1				2	3					2	5	5	1	3	5	2	1	2	4	1	1	2	2	2	2	2	2	2	2	2	1
464	2		1				2	4	1				1	1	1	1	4	7	1	1	2	1	1	3	1	1	2	2	2	2	2	1	2	1
465	2				1	HISPANIC	1	3	1	1	1		1	1	1	1	5	6	1	1	2	1	1	1	1	1	2	1	1	1	2	1	2	1
466	2		1				2	3	1		1	1	2	3	3	1	2	4	1	1	2	1	1	1	1	1	2	1	1	2	1	1	1	1
467	2		1				2	3			1		2	4	4	1	4	5	1	1	2	4	1	1	1	2	2	1	1	2	2	2	1	1
468	2		1				2	4					1	1	1	1	3	7	2	2	2	1	1	1	1	2	2	2	1	1	2	2	2	1
469	2		1				2	4	1	1			1	2	2	1	5	6	2	2	2	1	1	1	1	2	3	2	1	1	2	1	1	1
470	2		1				2	4				1	1	3	1	1	5	6	1	1	1	1	1	1	1	1	2	2	2	2	2	2	2	2	2	2	2	2	2	2
471	2		1				2	4	1		1		1	1	1	1	5	7	3	2	2	1	1	1	1	2	2	1	2	2	2	2	2	1
472	2		1				2	4	1		1	1	1	1	1	1	6	7	2	1	2	1	1	1	1	2	2	2	2	2	2	2	2	1
473	2				1	HISPANIC	1	4			1		1	1	1	2						1	1	1	1	2	2	2	2	2	2	2	2	2	2	2	2	2	2	1
474	2		1				2	4					1	3
475	1		1		1	HISPANIC	1	4					1	1	4	1	2	7	2	2	2	1	1	1	1	2	2	1	2	2	2	2	2	5	2	1	1	2	2	2
476	2				1	INDIAN	2	2	1		1		1	1	1	1	3	1				1	1	1	1	2	2	2	2	2	2	2	2	1
477	1						2	2					1	1	1	1	2	1				1	1	1	1	1	1	1	2	2	2	2	2	2	1	1	2	1	2	2
478	1		1				2	2					1	1	1		4	5	1	1	2	1	2	1	1	2	1							5	2	1	1	2	2	1
479	1		1				2	2	1	1	1	1	1	1			5	6	1	1	2	1	1	1	1	2	2	2	2	2	2	2	2	4	1	1	2	2	2	2
480	2		1				2	2	1	1	1	1	1	1	1	2						1	1	1	1	2	2	2	1	2	2	1	2	2	1	2	2	1	2	2
481	2		1				2	2		1	1		1	1	1	1	5	6	2	1	2	1	1	2	1	2	2	2	2	2	2	2	2	1
482	2		1				2	2				1	1	1	1	1	5	1				1	1	1	1	2	2	2	2	2	2	2	2	1
483	2		1				2	2	1	1	1		1	1	1	1	2	1				1	1	1	1	2	2	2	2	2	2	2	2	2	2	2	2	2	2	2
484	2		1				2	2		1	1		1	1	1		4	6	1	1	2
485	1		1				2	2		1			1	1	4	1	1	2	3	3	2	4	5	8	1	2	1							5	2	2	1	2	1	1
486	2		1				2	2	1	1	1	1	1	1	1	2						1	1	1	1	2	2	2	2	2	2	2	2	1
487	2			1			2	2	1	1	1		1	1	1	1	1	1				1	1	1	1	2	3	1	1	2	1	1	2	2	2	2	2	2	2	2
488	2		1				1	2	1		1		1	1	1	1	3	1				1	1	1	1	2	2	2	2	2	2	2	2	1
489	2		1				2	1					2	1	1	1	2	5	5	1	2	1	1	1	1	2	2	2	2	2	2	2	2	2	2	2	2	2	2	2
490	1		1				2	1					1	1	1	1	4	1				1	1	1	1	2	1							4	2	2	2	2	2	2
491	2				1		2	1		1			1	1	1	1	4	1	1	1	2	1	1	1	1	2	2	2	2	2	2	2	2	2	2	2	2	2	2	2
492	2		1				2	1		1			1	1		1	2	5	1	1	2	1	1	1	1	2	4	2	2	2	2	1	1	1
493	2		1				2	1		1			2	1		1	2	1				1	1	1	1	2	2	2	2	2	2	2	2	3	1	2	2	2	2	2
494	1		1				2	1					2	1	2	1	3	5	5	5	2	1	4	1	1	2	1							1	2	2	2	2	2	2
495	1		1				2	1		1			1	1	1	1	4	1				1	1	1	1	2	1							2	1	1	2	2	2	2
496	1		1				2	3					1	1	1	2						1	1	2	2	1	2	2						2	2	1	2	2	2	2
497	1		1				2	2		1			1	1	1	1	2	1				1	1	1	1	2	2	2	1	2	2	2	2	4	1	1	2	2	2	2
498	2		1				2	2	1	1	1		1	1	1	1	5	6	1	1	2	1	1	1	1	2	2	2	1	2	2	2	2	1
499	2		1				2	2	1	1			1	1	1	1	1	4	1	1	2	1	1	3	1	2	2	2	2	2	2	2	2	2	2	2	2	2	2	2
500	2		1				2	2	1		1	1	1	2	3	1	1	5	4	3	2	1	1	2	1	2	2	2	2	1	2	1	1	1
501	2		1				2	2	1	1	1		1	1	1	1	1	5	3	1	2	1	1	1	1	2	2	1	1	2	2	2	2	1
502	2		1				2	2	1		1		1	1	1	1	1	6	2	1	2	1	1	1	1	2	3	2	2	1	2	1	2	1
503	2		1				2	2			1		2	1	1	1	4	1				1	1	2	1	1	1							1
504	2		1				2	2		1	1		1	1	2	1	4	5	3	2	2	1	1	1	1	2	1							1
505	2		1		1	HISPANIC	1	2		1			1	1	1	2						1	1	1	1	2	3	2	1	2	1	2	2	2	2	2	2	2	2	2
506	1		1				2	2		1		1	6	1	1	1	4	1	1	1	2	1	1	2	1	2	2	2	2	2	2	2	2	3	2	2	2	2	1	2
507	2		1				2	2					2	5	3	1	1	3	4	3	2	1	5	3	1	2	2	2	2	2	2	2	2	1	2	2	2	2	2	2
508	1		1				2	2					1	1	1	2						1	1	1	1	2	1							1
509	2		1				2	2					1	5	4	1	1	4	3	2	2	1	5	8	1	1	1	2	2	2	2	2	2	2	2	2	2	2	2	2
510	1				1	HISPANIC	1	2		1			1	1	1	1	5	1				1	1	1	1	2	1							2
511	2		1				2	2	1		1		2	3	3	1	4	2	3	2	2	1	1	1	1	2	3	1	2	2	2	2	2	1
512	2		1				2	2					1	4	1	1	3	6	1	1	2	1					3	1	2	2	2	2	2	1	1	2	1	2	2	2
513	1		1				2	3					1	1								1	3	1	1	2	1							5	2	1	1	2	2	2
514	2		1				2	4	1				2	2	1	1	2	3	2	1	2	1	1	1	1	1								2	2	2	2	2	2	2
515			1				2	3					6	2	5	1	4	2	3	5	1	2					1	1	1	1	1	1	1	3	1	1	1	1	1	1
516	2		1				2	3		1			1	1	1	1	5	1	1	1	2	1	1	1	1	2	2	1	2	2	2	2	2	1
517	1		1				2	4		1			2	1	2	1	4	4	2	1	1	1	5	7	4	1
518	1		1				2	4		1			1	1	1	1	5	6	2	1	2	1	1	1	1	2	1							3	2	2	2	2	2	2
519	1		1				2	3						1	1	2						1	1	4	1	1	1							5	2	1	2	2	1	1
520	1				1	HISPANIC	1	2					1	1	1	1	4	1				1	1	1	1	2	1							2	1	2	2	2	2	2
521	1		1				2	4		1			1		5	1	5	6	2	2	2	2	1	1	1	2	1							4	2	2	2	2	2	2
522	1		1				2	3		1			1	5	5	1	1	4	2	2	2	3	1	3	1	2	1							4	2	2	2	2	2	2
523	2		1				2	4	1				1	1	1	1	5	7				1	1	1	1	2	3	1	1	2	2	2	1	4	2	2	1	2	2	2
524	2		1				2	3			1		2	3	4	1	5	6	3	1	2	1	1		1	2	2	2	2	2	2	2	2	1
525	2		1				2	4	1				2	1	1	1	6	7	1	1	2	1	1	1	1	2	3	2	2	2	2	2	2	1
526	1		1				2	2		1			2	5	5	1	1	3	3	3	2	4	3	4	1	2	1							1
527	2		1				2	2					1	2	3	1	1	6	2	1	2	1	1	5	1	2	2	1	2	2	2	1	2	1
528	1		1				2	2					1	4	4	1							4	3	1	2
529	1		1				2	2	1				1	1	1	2						1	1	1	1	2	1							2	1	1	2	2	2	2
530	1	1					2	2								1	3	3	2	2	2
531	1		1				2	2		1			2	1	3	1	5	5	3	1	2	1	3
532	1		1				2	2		1			1	2	3	1	5	4	3	2	2	1	5	3
533	1		1				2	2	1		1		1	1	1	1	4		1	1	2	1	3	1	1	2	2	2	2	2	2	2	2	2	2	2	2	2	2	2
534	2		1				2	2			1		1	1	1	1	5	5	2	1	2	1	1	3	1	2	4	1	2	1	2	2	1	2	2	2	2	2	2	2
535	1		1				2	2					2	5	3	1	1	4	1	1	2	1	3	1	1	2
536	2				1	HISPANIC	1	2				1	1		1	1	1	5	3	2	2		5	3	1	2	4	2	1	2	2	2	2	1
537	2		1		1	NATIVE A	2	3					1	1	5	1	4	5	4	4	2	3	1	1	1	2	2	2	2	2	2	2	2	1
538	1		1				2	3			1	1	1	1	1	1	3	1				1	1	1	1	2	2	1	2	2	2	2	2	1
539	1		1				2	3		1	1	1	1	1	1	2						1	4	1	1	2	1							2	2	1	2	2	2	2
540	1		1				2	3		1			1	1	1	1	4	6	1	1	2	1	1	1	1	2	1							3	1	1	1	1	1	2
541	2		1				2	3	1	1	1		1	1	1	1	5	6	1	1	2	1	1	1	1	2	2	1	2	2	2	2	2	1
542	2		1				2	3	1	1			1	1	1	2			1	1	2		1	1	1	2	3	2	2	2	2	2	2	2	2	2	2	2	2	2
543	2		1				2	3					1	1	1	1	5	6	3	2	2	1	1	1	1	2	4	2	1	2	2	1	2	1
544	1							3					6	5	5	1	2	2	6	6	2	3	2	8	3	2		1	2	1	2	2	2	1	2	2	2	2	2	2
545	2		1				2	3	1	1		1	1	1	1	1	5	6	3	2	2	1	1	1	1	2	4	2	1	2	2	1	1	1
546	2		1				2	4					1	5	3	1	4	6	4	1	2	1	1	1	1	1	2	2	2	2	2	2	2	1	2	2	2	2	2	2
547	2				1	HISPANIC	1	3				1	1	1	1	1	4	6	1	1	2	1	1	1	1	2	2	1	1	2	1		1	1
548	1		1				2	3					1	1			3	5	1	1	2	1	1	1	1	2	1							2	2	2	2	2	2	2
549	2		1				2	3					1	3	1	1	3	6	1	1	2	1	1	1	1	1	2	2	2	2	2	2	2	1
550	1		1				2	3					1	1	1	2						1	5	1	1	1	3	2	2	2	2	2	2	3	2	2	2	2	2	2
551	2		1				2	3	1		1		1	1	1	1	4	1				1	2	1	1	1	2	1	2	2	2	2	2	2	2	1	2	2	2	2
552	2		1				2	3		1			2	1	5	1	1	4	3	3	2	2	1	1	1	1	2	2	2	1	2	1	1	1
553	2		1				2	3	1		1		1	1	1		5	6	1	1	2	1	1	1	1	2	3	2	2	2	2	2	2	1
554	1		1				2	3					2	1	3	1	5	6	4	4	2	1	1	1	1	2	2	2	2	2	2	2	2	2	2	2	1	2	2	2
555	1		1				2	3					1	1	1	1	4	1				1	1	1	1	2	1							2	2	2	2	2	2	2
556	1		1				2	3	1	1	1		1	2	3	1	1	4	4	4	2	1	1	1	1	2	3	2	2	2	2	2	2	2	2	1	2	2	2	2
557	1		1				2	1	1	1	1	1	1	1	1	1	4	5	1	1	2	1	5	2	1	2	2	1	2	2	2	2	2	3	2	1	2	2	2	2
558	2		1				2	1	1	1	1	1	1	1	1	1	4	1				1	1	2	1	2	2	1	1	2	2	2	2	2	2	2	2	2	1	2
559	2		1				2	1		1	1	1	2	1	1	1	1	4	2	1	2	1	1	1	1	2	3	2	1	1	2	2	2	2	2	2	2	2	2	2
560	2		1				2	1		1		1	2	1	1	1	1	1				1	1	1	1	2	2	2	2	2	2	2	2	1
561	2		1				2	1	1		1		1	1	1	2						1	1	1	1	2	2	2	2	2	2	2	2	1
562	2		1				2	1			1		1	1		1	4	1				1	1	2	1	2	1							3	1	1	2	2	2	2
563	2		1				2	1					6	1	1	1	3	1				1	1	1	1	2	2	2	2	2	2	2	2	2	2	2	2	2	2	2
564	2		1				2	1	1	1	1	1	1	1	1	1	1	1				1	1	1	1	2	3	2	1	1	2	2	2	2	2	2	2	2	2	2
565	2		1				2	1				1	2	1	1	1	1	1				1	1	1	1	2	2	2	2	2	2	2	2	2	2	2	2	2	2	2
566	2		1				2	1		1			1	1		1	3	4	3	2	2	1	1	1	1	1	3	1	2	2	2	1	2	2	2	2	2	2	2	2
567	1		1				2	4		1			2	2	2	1	1	6	3	3	2	1	1	1	1	2	2	2	2	2	2	2	2	2	2	2	2	2	2	2
568	1		1				2	1		1			1	1	1	1	4	1				1	1	1	1	2	1							3	2	2	2	2	1	2
569	1		1				2	1		1			1	3	3	1	4	5	1	1	2	1	5	3	1	2	1							5	2	2	2	2	2	2
570	1		1				2	1		1	1		1	1	1	2						1	1	1	1	2	2	2	2	2	2	2	2	2	2	2	2	2	2	2
571	2		1				2	1	1	1			1	1	1	1	4	1				1	1	1	1	2	3	2	2	2	2	2	2	1
572	2		1				2	1			1	1	1	1	1	2						1	1	1	1	2
573	2		1				2	1		1			2	1	2	1	4	5	2	1	2	1	1	4	2	1	3	2	2	1	2	1	1	3	2	2	2	2	2	1
574	1		1				2	1				1	1	2	1	1	3	5	2	1	2	1	2	1	1	1	2	2	2	2	2	2	2	2	1	2	2	2	2	2
575	2		1				2	2	1	1	1	1	1	1	2	1	3	1	1	1	2	1	1	1	1	2	3	2	2	2	2	2	2	1
576	2		1				1	2					1	1	1	1	3					1	1	1	1	2	2	1	2	2	2	1	1	3	1	1	2	2	2	2
577	2		1				2	1		1			1	1	1	1	4	5	1	1	2	1	1	1	1	2	3	2	2	2	2	2	2	2	2	2	2	2	2	2
578	1		1		1	NATIVE A	2	1		1	1		1	1	1	1	3	1				1	1	3	1	2	1							2	2	2	2	2	2	2
579	1		1				2	1		1	1		1	1	1	1	4	1	1	1	2	1	1	1	1	2	2	2	2	2	2	2	2	3	1	2	2	2	2	2
580	2		1				2	1	1				1	1	1	2						1	1	1	1	1	2	1	2	2	2	2	2	1
581	2		1				2	1					1	1	3	1	1	4	6	6	2	1	1	1	1	2	4	2	2	1	1	1	2	1
582	2		1				2	1		1			1	1	1	1	4	1				1	1	1	1	2	3	2	1	2	2	1	2	1
583	1		1				2	2		1		1	1	1	3	1	2	4	4	3	2	1	1	3	1	2	2	1	2	2	2	2	2	3	2	2	2	2	2	2
584	2		1				2	1		1			1	1	1	1	4	1				1	1	1	1	1	2	2	2	2	2	1	2	2	2	2	2	2	1	2
585	2		1				2	1				1	2	1	1	1	4					1	1	1	1	2	1							1
586	2			1				1				1	1	1					1	1			1	1	1	2
587	1		1		1	HISPANIC	1	1		1	1	1	1	5	1	1	4	6	2	2	2	1	1	4	1	1	1							3	2	1	2	2	2	2
588	2		1				2	1		1			1	1	1	1	1	4				1	1	1	1	2	1							1
589	1		1				2	1	1				1	1	1	1	4	1				1	1	1	1	2	1							1
590	1		1				2	1		1			1	1	1	2						1	1	1	1	2	2	2	2	2	2	2	2	1
591	1		1				2	1		1		1	1	1	1	2						1	1	1	1	2	2	2	2	2	2	2	2	2	2	2	2	2	2	2
592	1		1				2	1	1		1		1	1	1	2						1	1	1	1	2	1							2	2	2	2	2	2	2
593	1		1				2	1	1				1	1	1	1	1	5	1	1	1	1	5	1	1	2	1							3	2	2	2	2	2	2
594	2		1				2	4					1	2	1		4	7	3	2	2	1	5	2	1	1	2							5	2	1	1	1	1	1
595	1		1				1	4		1			1	1	1	1	1	6	5	5	2	1	3	7	1	2	2	2	2	2	2	2	2	2	2	2	2	2	2	2
596	1			1			1	4					2	1	1	1	5	6	7	7	2	1	5	8		1	5	2	2	2	2	1	1	1
597	1		1				2	4		1			1	1	1	1	3	6	2	2	2	1	1	1	1	2	2	2	2	2	2	2	2	2	1	2	2	2	2	2
598	2		1				2	3	1	1	1		1	1	3	1	1	4	2	1	2	1	1	1	1	2	3	2	2	2	2	2	2	1
599	2		1				2	3		1		1	1	1	1	1	5	6	2	1	2	1	1	1	1	2	3	1	2	2	2	1	2	1
600	2		1				1	2	1				1		4	1	3	5	6	6	2	1	1	2	1	2	3	2	2	1	2	1	2	1
601	2		1				2	2					2	3	5	1	4	5	3	3	2	2	1	3	1	1	2	2						1
602	2		1				2	2		1			1	2	3	1	2	3	2	2	1		1	1	1	2	3	2	1	1	1	1	1	1
603	1		1				2	1					1	1	1	2						1	1	1	1	2	1	2						3	1	1	2	1	1	1
604	2		1				2	1					1	1	1	1						1	1	1	1	1	4	2	2	1	2	1	1	3	1	1	2	2	1	1
605	1		1				2	1				1	1	1								1	1	3	1	2	2							3	1	1	2	2	1	1
606	1			1			2	1	1	1			1	1	1	1	1	1				1	2	2	1	2	2	2	2	1	2	2	2	3	1	1	2	2	2	2
607	1		1		1	HISPANIC	1	1	1	1		1	1	1	1	1	3	6	1	1	2	1	1	1	1	2	1							1
608	1		1				2	2		1			1	1	1	1	4	5	3	1	2	1	5		1	2	5	2	2	1	1	1	1	5	2	1	2	1	1	1
609	2		1				2	2					1	5		1	4	5	3	2	2	1	1	3	1	1	2	2	2	2	2	1	1	2	2	2	2	2	2	2
610	1		1				2	3		1			2	2	3	1	1	5	4	4	2	1	3	3	1	2	2	2	2	2	2	2	2	1
611	2		1				2	3			1		1	1	1	1	4	1	1	1	2	1	1	1	1	2	1							1
612	1		1				2	3					1	1	1	2						1	1	1	1	2	2	2	2	2	2	2	2	1
613	2		1				2	3					1	2	5	1	4	5	3	2	2	1	5	1	1	2	1	2	2	2	2	2	2	3	2	2	2	2	1	1
614	1		1				2	3		1			1	5	5	1	1	4	7	5	1	3	1	7	2	2	1							4	2	2	2	2	2	2
615	1		1				2	2					2	4	3	1	4	5	2	1	2	4	5	2	1	2	1	2	2	2	2	2	2	4	2	2	2	2	2	2
616	1		1				2	2	1		1	1	1	1	1	1	4	1				1	2	3	1	2	3	2	2	2	2	2	2	5	2	1	1	2	2	1
617	2	1			1	JAMACIAN	2	2					2	1	1	1	2	6	2	1	2	1	1	3	1	2	4	2	2	1	2	2	2	1
618	2		1				2	4		1			1	1								1	1	1	1	1	2	1	2	2	2	2	2	2	2	2	2	2	2	2
619	2		1				2	4			1		1	1	1	2						1	1	1	1	2	2	1	2	2	2	2	2	1
620	1		1				2	2		1			1		5	1	1	2		3	1	2	5	7	1	2	1	2						5	2	1	2	2	2	2
621	1	1	1				1	2					2			1	1	4		2	2	3	1	3	1	2
622	2		1				2	2					1	3	2	1	1	4	1	1	2	1	1	1	1	2	3	2	2	2	1	2	2	1
623	1		1				2	2		1			1	3		1	3	4	2	2	2	3	2	6	1	2	2	2	2	2	1	2	2	2	2	2	2	1	2	2
624	1		1				2	2		1	1		2	1	1	1	1	2	1	1	1	4	5	8	5	2	1	1	1		1	1	1
625	2				1	HISPANIC	1	2		1			5	1	1	2						1	1	1	1	2	1							1
626	2		1				2	2			1		1	1		1	5	6	1	1	2	1	1	4	2	2	4	2	1	1	2	2	2	3	1	1	2	2	2	2
627	1		1				2	2		1			1														2							2	2	2	2	2	1	2
628	2		1				2	2		1	1		1	1	1	1	5	1				1	1	1	1	2	3	2	2	2	2	2	1	1
629	2		1				2	1				1	2	1	1	2						1	1	1	1	2	3	2	2	2	2	2	2	2	2	2	2	2	2	2
630	1		1				1	1	1	1	1	1	2	2	3	1	3	5	2	2	2	1	1	2	1	2	2	2	2	2	2	2	2	2	1	1	2	2	2	2
631	2		1				2	1		1			1	1	1	1	4	5	1	1	2	1	1	1	1	2	3	2	2	2	1	1	2	2	1	2	2	2	2	2
632	2		1				2	1		1	1		1	1	1	1	4	1				1	1	1	1	2	2	2	2	2	2	2	2	1
633	1		1				2	3		1			1	1	1	1	5	6	1	1	2	1	1	1	1	2	1							3	2	1	2	2	1	2
634	1			1			1	3		1	1	1	1	1	1	1	2	4	3	3	2	1	2	1	1	2	1							2	2	2	2	2	2	2
635	1		1				2	3					1	1	1	1	3	7	2	1	2	1	1	1	1	2	2	2	2	2	2	2	2	2	2	2	2	2	2	2
636	1			1			2	3					1	1	1		6	7				1	1	1	1	2	1							2	2	1	2	2	2	2
637	2		1				2	3					1	1	1	1	6	1			2	1	1	1	1	2	2	2	2	2	2	2	2	1
638	2		1				2	4	1				2	1	1	2						1	1	1	1	2	2	2	1	2	2	2	2	1
639	2		1				2	4	1				2	2	2	1	4	5	5	5	2	1	1	1	1	2	2	1	2	2	2	1	2	1
640	2		1				2	4	1		1		2	1	1	1	5	6	2	1	2	1	1	1	1	2	2	1	2	2	2	1	2	1
641	2		1				2	4		1	1		1	1	1	1	5	6	3	1	2	1	1	1	1	2	3	2	1	2	2	1	2	2	2	2	2	2	2	2
642	2		1				2	4	1		1		1	1	1	1	6	7	2	2	2	1	1	1	1	2	2	1	1	2	2	2	2	1
643	2		1				2	4	1	1	1	1	1	4	5	1	3	4	2	1	1	1	2	1	1	1	3	2	1	2	2	1	2	2	2	2	2	2	2	2
644	1		1				2	4					1	1	1	2						1	1	2	1	2	1							1
645	2		1					4			1	1	2	3	3	1	4	5	4	3	2	1	1	1	1	2	3	1	1	1	1	1	2	1
646	1			1			2	4		1	1		1	3	2	1	4	6	2	1	2	1	1	1	1	2	1							1
647	1		1				2	4					1	2	1	1	5	1				1	1	1	1	2	2	2	2	2	2	2	2	1
648	1		1				2	4		1			2	1	1	2						1	1	1	1	2	2	2	2	2	2	2	2	3	1	1	2	2	1	1
649	2		1				2	3	1	1	1	1	1	2	2	1	3	5	4	3	2	1	1	2	1	2	2	1	1	1	2	1	1	1	2	2	2	2	2	2
650	2		1				2	4		1			4	2	3	1	4	7	2	1	2	1	1	1	1	2	2	2	2	2	2	2	2	1
651	1		1				2	4					1	2	1	1	4	5	6	4	2	1	3	1	1	2	2	2	2	2	2	2	2	2	1	2	1	2	2	2
652	1		1				2	1	1				1	1	1	1	4	1				1	1	2	1	2	2	2	2	2	2	2	2	2	2	2	2	2	2	2
653	2		1				2	1		1			1	1	1	1	1	4	3	2	2	1	1	2	1	1	2	1	1	2	1	1	2	1
654	2		1				1	2		1			1	1	2	1	4	5	2	1	2	1	1	1	1	2	2	2	2	1	2	2	2
655	1			1			2	2		1		1	1	4	4	1	1	5	1	1	2	1	1	2	1	2	1							2	2	2	2	2	2	2
656	2		1				2	2		1			1	1	1	1	4	5	6	1	2	1	1	1	1	1	3	2	2	2	2	1	1	1
657	1		1		1	HAWAIIAN	2	2					1	1	5	1	2	4	2	2	2	1	5	8	1	2	1							2	2	2	2	2	2	2
658	2		1				1	1	1				2	4	1	1	2	5	1	1	2	1	1	1	1	1	2	2	2	2	2	1	2	2	2	2	2	2	2	2
659	2		1		1	SPANISH	2	1					1	1	1	1	1	3	2	1	2	1	1	1	1	1	3	2	1	2	2	1	2	2	1	2	2	2	1	2
660	2		1				2	2					2	5	5	1	2	3	6	5	2	5	5	8	2	1	3	1	1	1	2	2	1	1
661	2		1				1	3	1				1	1	1	1	5	6	1	1	2	1	1	1	1	1	2	1	1	2	1	1	2	1
662	2		1				2	3	1		1		1	1	1	2						1	1	1	1	2	2	2	2	2	2	2	2	2	2	2	2	2	2	2
663	1		1				2	2					6	2	5	1	1	3				1	1	3	1	2	2	2	2	2	2	2	2
664	2		1				2	2					1		5	1	5	6	3	1	2
665	2		1					4	1		1		1	1	1	1	3	1				1	1	1	1	2	3	1	2	2	2	1	2	1
666	1		1				2	4					2	1	1	2		1	1	1	2	1	1	1	1	2	1							5	2	2	1	2	1	1
667	1		1				2	4		1			1		2	1	4	5	5	5	2	1	1	1	1	2	2	2	2	2	2	2	2	2	2	2	2	2	2	2
668	2	1	1				2	1	1					1	1	2						1	1	3	1	2	2	2	2	2	2	2	2	3	2	2	2	2	1	1
669	2		1					1					1	4	4	1	4	5	1	1	2	1	1	1	1	2	1	2	1	2	1	1	1	2	2	2	2	2	2	2
670	2				1	ECUADORI	1	1			1	1	1	3	2	1	3	5	2	2	2	2	1	1	1	1	2	2	2	2	2	2	2	2	2	2	2	2	2	2
671	2		1				1	1		1				1	1	1	4	5	1	1	2	1	1	1	1	2	4	2	1	1	2	1	2	2	2	2	2	1	2	2
672	2		1				2	1		1			1	1	2	1	4	1				1	1	1	1	2	1							2	2	2	2	2	2	2
673	1		1				1	1	1	1	1		2	1	1	2						1	1	1	1	2	1	2						4	1	1	2	2	2	2
674	1		1				2	1	1			1	1	1	1	1	2	1				1	3	4	1	2	1							3	1	2	2	2	2	2
675	1		1				2	1	1	1			1	1	1	1	4	5	3	1	2	1	5	2	1	2	1							2	2	2	2	2	2	2
676	2		1				2	1	1		1		2	1	1	1	3	5	2	2	2	1	1	1	1	2	3	2	2	2	2	2	1	1
677	1		1				2	1		1			1	1	2	1	3	5	5	3	2	1	1	2	1	2	2	2	2	2	2	2	2	3	1	1	1	1	1	1
678	2				1	PUERTO R	1	4					1	5	3	1	3	5	4	1	2	1	1	2	1	2	2	1	2	2	2	1	1	1
679	2		1				2	4					1	2	2	1	5	6	5	5	2	1	1	1	1	2	2	1	2	2	2	2	2	1
680	1		1				2	4					1	1	1	1	4	5	3	1	2		1	1	1	2	2	2	2	2	2	2	2	2	2	1	2	2	2	2
681	1		1				2	4					1	2	1	1	4	6	1	1	2	1	2	1	1	2	2	2	2	2	2	2	2	2	2	2	2	2	2	2
682	2		1				2	4	1				2	1	2	1	3	5	1	1	2	1	1	1	1	2	2	1	1	2	1	2	2	1
683	2		1				2	4			1		2	1	1	1	4	6	1	1	2	1	1	1	1	2	3	2	2	2	2	2	2	1
684	2		1				2	4		1			1	2	3	1	2	6	5	3	2	1	1	2	1	2	2	2	2	2	2	2	2	1	2	2	2	2	2	2
685	2		1				2	3					1	1	2	1	5	6	2	1	2	1	1	1	1	2	2	2	1	2	2	1	2	3	2	1	1	1	1	1
686	1		1				2	3					2	1	1	2						1	1	3	1	1	2	2	2	2	2	2	2	1
687	2		1				2	4	1	1	1		1	1	1	1	5	1				1	1	1	1	2	2	2	2	2	2	2	2	1
688	1		1				2	3	1				2	5	4	1	4	5	6	5	2	3	1	3	1	2	2	2	2	2	2	2	2	1
689	2		1				2	3		1	1		1	1	1	1	4	6	1	1	2	1	1	2	1	1	3	2	2	2	2	2	2	1
690	2		1				2	4		1			1	1	1	1	5	6	2	1	2	1	1	2	1	2	2	2	2	2	2	2	2	2	2	2	1	2	2	2
691	1		1				2	3		1			1	1	2	1	4	5	1	1	2	1	1	1	1	2	1	2	2	2	2	2	2	1
692	2		1				2	4		1			1	3	4	1	5	6	5	5	2	1	1	1	1	2	2	2	2	1	2	1	1	2	2	2	2	2	2	2
693	1		1				1	4					1	5	5	1	2	5	5	5	2	3	1	3	1	2	2	2	2	2	2	1	2	1
694	2		1				2	3	1	1	1		1	1	1	1	4	5	1	1	2	1	1	1	1	2	3	2	2	1	2	2	2	2	2	2	2	2	2	2
695	1		1				2	4					1	1	1	1	2	5	3	3	2	1	1	1	1	2	1	2						2	2	2	2	2	2	2
696	1		1				2	1	1				1	1	1	1	3	1				1	1	1	1	2	2	2	2	2	2	2	2	2	1	1	1	2	2	2
697	2		1				2	1		1	1		1	1	1	1	5	1				1	1	1	1	2	2	2	2	2	2	2	2	1
698	1		1				2	4			1	1	1	1	1	1	4	6	2	1	2	1	1	2	1	2	1							1
699	2		1				2	3			1	1	1	1	1	1	1	3	2	1	2	1	1	1	1	2	2	2	2	1	2	2	2	1
700	1		1				2	4					1	1	2	1	6	7	1	1	2	1	1	1	1	1	1							2	2	2	2	2	2	2
701	2		1				2	3			1		1	3	2	1	5	6	3	1	2	1	1	1	1	2	1	1	2	2	2	2	2	1
702	2		1				2	3		1	1		2	4	4	1	3	4	5	5	2	1	1	1	1	2	2	2	2	2	2	2	2	1	2	2	2	2	2	2
703	2		1				2	2	1	1			1	1	1	1	4	6	1	1	2	1	1	1	1	2	2	2	2	2	2	2	2	3	2	2	2	2	2	2
704	2		1				2	2		1			1	1	1	1	5	4	7	1	2	1	1	1	1	2	2	2	2	2	2	2	2	2	2	2	2	2	2	2
705	1		1				2	2					1	1			1	1				1	1	1	1	2	1							1
706	2		1				2	2					1	5	3								1	1	1
707	2		1				2	2					2	5	3	1	3	5	2	2	2	1
708	1		1				2	1		1		1	2	1		1	1	5	2	1	2	1	1	3	1	2	1							2	2	1	2	2	2	2
709	1			1			2	1		1			1	1	1	1	4	5	1	1	2	1	1	1	1	2	1	2	2	2	2	2	2	2	2	2	2	2	2	2
710	1		1		1		2	1					2	1	3	1	1	4	2	2	2	1	2	2	1	2	1							2	2	2	2	2	2	2
711	1		1				2	1		1		1	1	1	1	1	1	1				1	1	5	1	2	1							2	2	2	2	2	2	2
712	2		1				2	1				1	1	5	5	1	2	5	3	3	2	2	1	1	1	1	3	1	1	2	2	1	1	1
713	1				1	HISPANIC	1	1		1			1	1	5	1	1	5	2	1	2	5	5	3	1	1	4	2	2	2	2	2	2	5	2	1	1	1	1	1
714	1		1				2	1					1	1	1	1	3	1				1	1	1	1	2	1							2	2	2	2	2	2	2
715	2		1				2	1		1			1	1	1	1	2	1				1	1	1	1	2	3	2	2	2	2	2	2	3
716	1		1					1		1			2	1	1	1	4	6	4	2	2	1	1	4	1	2	1							1
717	1				1	HISPANIC	1	4					1	1	2	1	1	7	4	3	2	1	1	1	1	2	1	2	2	2	2	2	2	2	2	2	2	2	2	2
718	2		1				2	3					1	3	1	1	5	6	2	1	2	1	1	1	1	2	3	1	2	2	2	1	2	2	2	2	2	2	2	2
719	2		1				2	3	1				1	1	1	1	5	7	2	1	2	1	1	1	1	2	3	1	2	2	2	1	2	1
720	2							3	1	1		1	1	1	4	1	2	5	3	1	2	1	1	3	1	2	2	2	2	1	2	1	1	1
721	2		1				2	3	1			1	1	1	1	1	1	4	3	1	2	1	1	1	1	2	2	2	2	1	2	1	1	1
722	2		1				2	3	1	1			1	4	5	1	1	6	4	3	2	2	5	2	1	2	3	1	1	1	2	2	2	2	2	2	2	2	2	2
723	2		1				2	3		1			1	2	1	1	4	5	3	3	2	1	5	2	1	2	3	1	2	2	2	2	2	2	2	2	2	2	2	2
724	1	1					2	4		1			1	1	1	1	1	7	1	1	2	1	1	1	1	2	1							4	2	1	2	2	2	2
725	1		1				2	4					1	1	1		2	3	1	1	2	1	1	1	1	1	1							2	1	2	2	2	2	2
726	2		1				2	4		1	1		2	1	1	1	3	7	2	1	2	1	1	2	1	2	2	2	2	2	2	1	2	1
727	1		1					4		1			1	1	1	2						1	1	8	1	2	1							3	1	1	2	2	2	2
728	2		1				2	1					2	1	1	1	4	1	1	1	2	1	1	1	1	2	3	2	2	2	2	2	2	2	1	1	2	2	2	1
729	2		1				2	1					1	1	1	1	4	1				1	1		1			2	2	2	2	2	2	1
730	2				1		2	1		1				1	1	1	2	1	1	1	2	1	1	1	1	2	2	1	1	2	2	2	2	1
731	2		1				2	1	1	1	1		1	3	4	1	4	5	3	3	2	1	1	1	1	2	3	2	2	2	2	2	2	2	1	2	2	2	2	2
732	2		1				2	1	1				1	1		1	3	1	1	1	2	1	1	1	1	2	3	2	1	2	2	2	2	1	2	2	2	2	2	2
733	1		1				2	1	1				1	1	1	1	4	1	1	1	2	1	1	1	1	2	2							2	2	2	2	2	2	2
734	1		1				2	1		1			1	2	2	1	4	5	2	1	2	1	1	1	1	2	2	2	2	2	2	2	2	2	2	1	2	2	2	2
735	1		1		1		2	1	1		1	1	2	1	1	1	1	1				1	1	2	1	2	2							2	1	1	2	2	2	2
736	2		1				2	1	1	1	1	1	1	1	1	1	5	1				1	1	1	1	2	2	2	2	2	2	2	2	1
737	2		1				2	1		1		1	1	1	1	1	5	1	1	1	2	1	1	2	1	2	2							1
738	2		1				2	1	1	1			1	1	1	1	4	1				1	1	1	1	2	4	1	2	2	2	2	2	1
739	1		1		1	ITALIAN	2	1		1	1		1	1	1	1	4					1
740	1		1				2	1					1	1	1	1	5	6	1	1	2	1	1	1	1	2	1							1
741	2			1			2	1		1	1		2	1	1	1	4	5	1	1	2	1	1	1	1	2	2	2	2	2	2	2	2	1
742	2		1				2	1	1	1			1	1	1	1	4	5	1	1	2	1	1	1	1	2	3	2	2	2	2	2	2	1
743	2		1				1	1		1			1	1	1	1	3	1				1	1	1	1	2	2	2	2	2	2	1	2	2	2	2	2	2	2	2
744	1		1				2	1		1			1	1	5	1	3	5	3	2	2	1	3	4	1	2	2	2	2	2	2	2	2	2	2	2	2	2	2	2
745	2		1		1	HISPANIC	1	1				1	1	1	1	1	4	5	2	1	2	1	1	1	1	2	2	2	2	2	2	2	2	2	2	2	2	2	2	2
746	2				1	MIDDLE E	2	1					1	1	1	2						1	1	1	1	1	3	2	2	2	2	2	2	1
747	1		1				2	1			1	1	1	1	1	1	4	5	1	1	2	1	1	1	1	2	1							5	2	1	2	2	2	2
748	1		1				2	2	1	1	1		1	1	1	1	1	4	2	1	2	1	1	1	1	1	2	2	1	2	2	2	2	2	2	1	2	2	2	2
749	2		1				2	2	1	1	1	1	6	1	1	1	2	1	1	1	2	1	1	1	1	2	2	2	1	2	2	2	2	1
750	2		1				2	2		1	1		1	1	1	1	3	6	2	1	2	1	1	1	1	2	4	2	2	2	2	2	1	1
751	1		1				2	2		1		1	1	1	1	1	2	1	1	1	2	1	1	1	1	2	2	1	2	2	2	2	2	2	1	1	2	2	2	2
752	2		1				2	2	1		1		1	1	1	1	3	6	2	2	2	1	1	1	1	2	2	2	2	2	2	1	1	1	2	2	2	2	2	2
753	2		1				2	4						3	5	1	1	5	4	4	2	1	1	2	1	1	3	2		2	2	1	2	2	2	2	2	2	2	2
754	1		1				2	4	1		1	1	1	1	3	1	4	6	2	2	2	1	1	1	1	2	1							1
755	1		1				2	4			1		1	1		2						1	1	1	1	2	1							1
756	1		1				2	1					1	4	4	1	4	1	1	1	2	1	2	1	1	2	1	2	2	2	2	2	2	2	1	1	2	2	1	1
757	1		1				2	4			1		1	1	1	1	5	6	1	1	2	1	3	1	1	2	1							4	2	2	2	2	2	2
758	2		1				2	1		1		1	1	1	1	1	4	1				1	1	1	1	2	2	2	2	2	2	2	2	1
759	2	1					2	1					1	1	1	1	1					1	1	1	1	2	2	2	2	2	2	2	2	1
760	2		1				2	1	1		1	1	1	2	3	1	2	1				1	1	1	1	1	2	2	2	2	2	2	2	1
761	2		1				2	1		1	1	1	1	1	1	2						1	1	1	1	2	2	2	2	2	2	2	2	2	2	2	2	2	2	2
762	2		1				2	1	1				2	1	1	2						1	1	1	1	2	2	1	2	2	2	2	2	1
763	2		1				2	1	1	1	1		1	1	1	1	4	1	1	1	2	1	1	1	1	2	1	2						2	2	2	2	2	2	2
764	1		1		1	HISPANIC	1	1	1	1			1	1	1	1	4	5	1	1	2	1	1	1	1	2	1	2	2	2	2	2	2	3	2	1	2	2	2	2
765	2		1				2	1	1	1	1	1	1	1	1	1	4	1				1	1	1	1	2	1							1
766	2		1	1			2	1	1	1	1	1	1	1	1	1	4	1				1	1	1	1	2	1							2	2	2	2	2	2	2
767	1		1				2	1		1			2	1	1	1	1	6				1	1	1	1	2	1							3	2	1	2	2	2	2
768	1		1		1		1	2					1	3	5	1	3	5	2	1	2	3	1	2	1	1	1	2	2	2	2	2	2	2	2	2	2	2	2	2
769	1		1				2	2		1			2	1	1	1	3	6	1	1	2	1	1	1	1	2	2	2	2	2	2	2	2	2	2	2	2	2	2	2
770	1		1				2	2		1			1	1	1	1	2	6	1	1	2	1	1	1	1	2	2	2	2	2	2	2	2	3	2	2	2	2	2	2
771	1		1				2	1	1	1		1	1	1	1	2						1	1	1	1	2	2	2	2	2	2	2	2	3	1	1	2	2	2	2
772	1		1					1		1			1	1	1	1	2	1				1	1	1	1	2	1							1
773	2		1				2	1	1	1	1		1	1	1	2						1	1	1	1	2	2	2	2	2	2	2	2	2	2	2	2	2	2	2
774	2		1				2	2	1				2	4	2	1	4	5	3	3	2	1	5	3	1	2	1							1
775	2		1				2	2					1	4	3	1	4	5	3	2	2	1	1	2	1	2	3	1	1	1	2	2	1	1
776	2		1				2	2					2	1	1	1		1				1	3	3	1	1	2	2	2	2	2	2	2	2	2	2	1	2	2	2
777	2				1	HISPANIC	1	2					2	5	3	1	2	5	4	4	2	1					1							1
778	2		1				2	2		1			1	1	1	1	4	1				1	1	1	1	2	3	2	2	2	2	2	2	2	2	2	2	2	2	2
779	1		1				2	2					2	5	5	1	3	5	5	5	2	3	1	4	1	1	2	1	2	2	2	1	2	1
780	1		1				2	2		1		1	1	1	1	1	5	6	2	1	2	1	1	1	1	2	2	2	2	2	2	2	2	4	2	1	2	1	1	2
781	2		1				2	2		1			1	2	2	1	3	5	3	2	2	1	1	1	1	2	3	2	1	2	2	1	2	1
782	1		1				2	2		1	1	1	1	1	1	1	1	1				1	1	1	1	2	1							2	2	1	2	2	1	2
783	2		1				2	2					1	1	1	1	3	5	1	1	2	1	1	1	1	2	2	2	2	2	2	1	1	1
784	1		1				2	2		1			1	1	1	1	4	5	1	1	2	1	2	2	1	2	2	2	2	2	2	2	2	2	2	2	2	2	1	1
785	1		1				2	2		1			1	3	3	1	3	5	3	2	2	1	1	8	1	2	2							4	1	1	2	2	2	2
786	1		1				2	2		1	1		6	1	1		1	6	2	2	2	1	1	1	1	2	2	2	2	2	2	2	2
787	2		1				2	2	1	1	1		1	1	1	1	3	5	2	1	2	1	1	1	1	2	1							2	2	2	2	2	2	2
788	2			1			2	1		1		1	1	1	1	2						1	1	1	1	2	2	2	2	2	2	2	2	2	2	2	2	2	2	2
789	2		1				2	1	1	1	1		1	1	1	2						1	1	1	1	2	2	2	2	2	2	2	2	2	2	2	2	2	2	2
790	1		1				2	1					1	1	1	1	4	1				1	1	1	1	2	2	2	2	2	2	2	2	3	2	2	2	2	2	2
791	2		1				2	1	1	1		1	1	1	1	1	1	5	2	1	2	1	1	1	1	2	3	2	2	2	2	2	2	2	2	2	2	2	2	2
792	2		1				1	1					1	1	5	1	4	5	5	4	2	5	1	2	1	2	4	2	2	2	2	1	2	2	2	2	2	2	2	2
793	2		1				2	1		1			1	3	1	1	3	4	2	1	2	1	1	1	1	2	3	2	2	2	2	2	2	2	2	2	2	2	2	2
794	2		1				2	1		1			1	1	1	1	4	1				1	1	1	1	2	2	2	1	2	2	1	2	1
795	2		1				2	1	1		1	1	1	1	1	1	4	1	1			1	1	1	1	2	2	2	2	2	2	2	2	1
796	2		1				2	1		1			1	1	1	1	3	1				1	1	1	1	2	2	2	2	2	2	2	2	2	2	2	2	2	2	2
797	2		1				2	1		1	1	1	1	4	3	1	3	5	2	1	2	3	1	2	1	2	2	2	2	2	2	1	2	2	2	2	2	2	1	2
798	1		1				2	2					1	5	5	1	1	4	6	6	2	3	5	3	1	2	2	2	2	2	2	2	2	2	2	2	2	2	2	2
799	2		1				2	2		1			1	4	5	1	4	5	4	3	1	1	1	2	1	1	2	2	2	1	2	2	2	1
800	2		1				2	2		1			2	1	1	1	5	1	1	1	2	1	1	1	1	2	2	2	2	2	2	2	2	1	2	2	2	2	2	2
801	1		1				2	2	1				1	2	1	1	5	6	2	1	2	1	1	1	1	2	1	2	2	2	2	2	2	2	2	2	2	2	2	2
802	1			1			2	2		1			1	3	4	1	4	5	2	2	2	1	5	1	1	2	2	2	2	2	2	2	2	3	1	2	2	2	2	2
803	2		1				2	2		1			1	5	1	1	2	4	3	3	2	1	1	1	1	2	2	1	1	2	2	2	2	1	2	2	2	2	2	2
804	1		1				2	1		1			1	1	1		2	1				1	1	1	1	2	2	2	2	2	2	2	2	1
805	2		1				2	1		1			1	2	1	1	4	1	1	1	2	1	1	1	1	2	2	2	2	2	2	2	2	1	2	2	2	2	2	2
806	2		1				2	1	1		1		2	1	1	2						1	1	1	1	2	2	2	2	2	2	2	2	2	1	2	2	2	1	2
807	2				1	CROATIAN	2	1	1		1		1	3	3	1	4	5	2	1	2	1	5	3	1	2	2	2	2	2	2	2	2	1
808	2		1				2	1			1		1			2						1	1	1	1	2	1							1
809	2		1				2	2		1			2	2	2	1	3	4	1	1	2	1	1	1	1	2	1	2	2	2	2	2	2	2	2	2	2	2	2	2
810	1				1	HISPANIC	1	4					1	1			5	6	5	4	2	1	1	1	1	1	1	2						2	1	2	2	2	2	2
811	2		1				2	3	1	1	1		1	3	1	1	1	3	5	5	1		3	4	2	1	4	1	2	2	1	1	1	1
812	2		1				2	3	1				2	2	2	1	2	5	4	4	2	1	1	1	1	2	3	1	1	1	2	2	2	1
813	2		1				2	2		1			2	3	3	1	5	6	3	3	2	1	1	1	1	2	2	1	2	2	2	2	2	1
814	1		1				2	2					1														5							5	2	2	2	1	2	2
815	2		1				2	3					1	5	5	1	1	5	2	1	2	2	1	2	1	1	3	2	2	2	2	2	2	1
816	1		1				2	3			1		1	1	1	1	5	1				1	1	1	1	2	1							3	2	2	2	2	2	2
817	2		1				2	4				1	1	1	1	1	1	1				1	1	1	1	2	2	2	2	1	2	2	2	1
818	1		1				2	2					1	5	3	1	1	4	3	3	1	3	5	7	2	2	2	2	2	2	2	2	2	4	2	2	2	2	2	1
819	2		1				2	2					2	4	3	1	3	4	5	4	2	1	1	2	1	2	2	2	2	2	2	2	2	1
820	2		1				2	2	1	1	1		2	1	1	1	4	5	1	1	2	1	1	1	1	2	2	2	2	2	2	2	2	2	2	2	2	2	2	2
821	2	1					2	2	1	1			1	1	1	1	3	1				1	1	1	1	2	3	2	2	2	2	2	2	1
822	1		1				2	2					1	1	3	1	5	6	2	2	2	1	1	8	1	2	1							1
823	1	1					2	2					1		5	1	4	5	5	4	2	3	5	8	1	2								2	2	2	2	2	2	2
824	1			1			1	2					1		4	1	4	5	4	4	2	1	1				5	2	2	2	2	2	2	2
825	2		1				2	2	1	1		1	1	2	2	1	4	5	3	3	2	1	1	1	1	1	4	2	2	2	2	2	2	1
826	1				1	HISPANIC	1	2		1			1	2	2	1	4	5	1	1	2	1	1	2	1	2	2	2	2	2	2	2	2	3	2	2	2	2	2	2
827	1			1			2	2					1	3	4	1	3	5	1	1	2	1	1	1	1	1	1							3	2	2	2	2	2	2
828	1		1				2	2		1			1	1	3	1	5	6	3	1	2	1	1	1	1	2	1							2	2	2	2	2	2	2
829	2		1				2	3					1	3	5	1	1	4	2	1	2	3	1	2	1	2	2	2	2	2	2	2	2	1
830	2		1				2	4			1		1	1	1	1	1	7	2	1	2	1	1	1	1	2	3	2	2	2	2	2	2	2	2	2	2	2	1	2
831	2		1				2	4		1			1	2	2	1	3	5	5	5	1	1	1	3	1	1	3	2	2	2	2	1	1	2	2	2	2	2	2	2
832	2		1				2	2						5	5	1	2	3	6	6	2	5	5	3	2	1	3	1	1	1	1	1	2	1
833	2		1				2	4	1	1	1	1	1	2	3	1	1	6	3	3	2	1	1	1	1	2	2	2	2	2	2	2	2	1
834	1		1				2	3	1		1		1	1	1	2						1	1	1	1	2	2	2	2	2	2	2	2	2	2	2	2	2	2	2
835	2		1		1		1	3		1			2
836	2		1				2	4	1		1		2	5	4	1	2	4	2	1	2	4	2	2	1	2	3	1	1	2	1	1	1	1
837	2		1				2	4			1		1	2	1	1	3	1				1	1	1	1	2	3	2	2	2	2	2	2	1
838	2		1				2	2					1	4	1	1	4	5	5	3	2	1	1	1	1	2	3	2	2	2	2	2	2	1
1	2		1				2	2	1				1	1	1	2						1	1	2	1		3	2	2	2	2	2	2	1
2	1		1				2	2					1	4	4	1	3	5	2	1	2	4	1	1	1	1	1							3	2	2	2	2	2	2
3	2		1				2	4	1				4	5		1	2	3	7	6	1	4	1	1	1	2	2	2	2	2	2	2	2	1
4	2		1				2	1					5	5	4	1	2	3	3	2	2	2	1	3	1	2	2	2	2	2	2	2	2	1
5	2		1				2	1					2	5	5	1	1	3	4	3	1	4	1	3	1	1	3	2	2	2	1	1	2	3	2	2	2	2	2	2
6	2		1				2	3	1				1	5	5	1	1	5	2	2	2	2	1	3	1	1	2	2	1	2	2	2	2	1
7	2		1					1		1	1		2	5	4	1	1	3	1	1	2	1	1	4	1	1	4	2	2	2	2	2	2	1
8	2		1				2	4					2	5	4	1	1	4	5	5	2	3	3	3	1	1	2	2	2	2	2	2	2	2	2	2	2	2	2	2
9	1		1				2	2		1			5	3	4	1	3	4	4	2	1	2	4	3	1	2	2	2	2	2	2	2	2	3	2	2	2	2	1	2
10	2		1				2	1	1				6	5	4	1	5	5	2	2	2	1	1	1	1	2	1	2	2	2	2	2	2	2	1	2	2	2	2	2
11	1		1				2	4	1				1	5	3	1	4	7	5	5	2	2	2	4	1	1	1							1
12	1		1				2	1						5	5	1	4	6	2	2	2	2	2	3	1	2	2	1	2	2	2	2	2	2	2	2	2	2	2	2
13	2				1	LATIN	1	2					1		3	1	3	5	3	2	2	2	1	1	1	2	2	2	2	2	2	2	2
14	1		1				2	3					1	5	2	1	4	4	2	2	2	3	5	3	1	2	1							1
15	1		1				2	4	1				2	5	4	1	5	6	1	1	2	1	1	1	1	2								1
16	1	1		1			2	3		1			5		4	2	5	2		4	1		1	1	2	2	4	2	2	2	1	1	2		2	1	1	2	1	2
17	1		1				2	3		1			2	5	3	1	2	5	6	5	1	2	5	8	3	2	2	2	2	2	2	2	2	2	2	2	1	2	2	2
18	2		1				2	1	1				2	5	4	1	3	4	3	2	2	5	1	3	1	1	2	2	2	2	2	2	2	1
19	1		1				2	3	1				1	2	2	1	5	7	6	1	2	3
20	1		1				1	3					4	5	5	1	5	4	2	2	2	2	5	1	1	2	1		2	2	2	2	2	5	2	2	1	2	2	1
21	2		1				2	3	1				2	5	4	1	4	4	7	6	2	5	2	3	4	2	5	2	2	2	2	2	2	5	2	2
22	1		1				2	3		1			1	5	5	1	1	3	3	2	2	2	3	3	1		2	2	2	2	2	2	2	1
23	1		1				2	1	1				5	1	1	1	3	5	3	2	2	1	1	2	1	2	2	2	2	2	2	2	2	1
24	2		1				2	3					1	5	4	1	3	5	4	4	2	2	3	1	1	2	3	2	2	1	2	1	2	1
25	2		1				2						2	5	3	1	1	6	5	3	2	1	3	3	1	2	2	2	2	2	2	2	2	1
26	2		1				2	2			1		2	5	4	1	3	5	4	3	2	1	1	1	1	2	3	1	2	2	2	1	2	1
27	2		1				1	4					1	4	4	1	1	3	2	2	1	1	1	1	1	1	2	2	2	2	2	1	2				2	2	1	1
28	1		1				1	3		1			2	5	5	1	3	4	2	2	2	2	5	3	1	2	3	2	2	2	2	2	2	2	2	2	1	2	2	2
29	2		1				2	4					4	5	3	1	3	4	6	5	1	3	1	2	1	2	1							1
30	1		1				2	2					2	5	4	1	4	5	5	5	1	1	1	2	1	2	1							1
31	2		1				2	1					2	5	3	1	3	4	1	1	2	2	1	2	1	1	3	2	2	2	2	1	2	2	1	2	1	2	1	1
32	2		1				2	3					1		5	1	5	6	3	2	2	2	1	3	1	1	2	2	2	1	2	2	2	1	2	2	2	2	2	2
33	2	1			1		2	3	1				6	4	3	1	4	1	1	1	2	1	1	3	1	2	3	1	1	1	1	1	2	1
34	2		1				2	4					1	5	5	1	1	5	2	1	2	4	1	2	1	2	1	1	2	2	2	2	2	1
35	1		1				2	1					1	5	5	1	1	5	4	2	2	2	5	3	1	2
36	2		1				2	1					1	3	5	1	4	6	2	1	2				1	1	1	2	2	2	2	2	2	1
37	1	1					2	1		1		1	2	1		1	5	4	1	1	2	1	1	1	1		3	2	2	2	2	2	2	2	1	1	2	2	2	2
38	2		1				1	2	1				2	5	3	1	4	5	2	2	2	1	1	1	1	2	1							1
39	1		1				2	4					2	4	5	1	5	6	3	2	2	1	1	2	1	2	1							3	1	2	2	2	2	2
40	2		1				2		1				4	5	5	1	2	5	1	1	2	4	1		2	1	1	2	2	2	2	2	2	1	2	2	2	2	2	2
41	2				1		1	4					1	4	4	1	1	2	4	4	2	1	5	2	1	1	1							1
42	2		1				2	3	1				6	5	4	1	2	2	1	1	1	3	1	1	1	2	1	2	2
43	1		1				2	3		1			2	5	4	1	2	3	2	1	2	1	1	1	1	2
44	2		1				2	2					1	5	4	1	3	4	5	6	2	3	5	5	1	2	2	2	2	2	2	2	2	1
45	1		1				2	2					1	5	4	1	2	4	5	3	2	3	5	4	1	1
46	1		1				2	4	1					5	5	1	1	2	5	5	2	2	1	3	1	1	2	2	2	2	2	2	2	1
47	1		1				2	3					2	5	3	1	3	6	3	2	2	1	1	1	1	2	2							2
48	1		1				2	1					2	3		1	1	2	6			3
1370	1		1				2	2	1	1			1	1	5	1	2	3	5	2	2	1	1	1	1	2	1							1
1371	1	1	1	1	1	NATIVE A	2	2		1	1		1	5
1372	2		1				1	2			1		1	1	2	1	3	6	2	1	2	1	1	1	1	2	4	2	1	1	2	1	1	1
1373	1				1	HISPANIC	1	2			1	1	1	1	2	1	4	6	2	1	2	1	1	1	1	2	1							3	2	1	1	2	1	2
1374	1		1				2	2	1		1		1	1	1	1	4	5	1	1	2	1	1	1	1	2	2	2	2	2	2	2	2	3	1	2	2	2	1	2
1375	1		1				2	1	1	1		1	1	1	1	2						1	1	1	1	2	1							2	2	2	2	2	2	2
1376	2		1				2	1					1	1	1	1	5	1	1	1	2	1	1	1	1	1	2	2	2	2	2	1	2	1
1377	2		1				2	1					1	1	1	1	3	1				1	1	1	1	2	1	2	2	2	2	2	2	3	1	2	2	2	2	2
1378	2		1				2	1	1	1			1	1	1	1	5	1				1	1	1	1	2	2	2	2	1	2	2	2	1
1379	1		1				2	1					1	1	3	1	1	4	4	1	2	1	1	2	1	1
1380	1		1				2	1		1			1	1								1	1	3	1	2	1							2	1	1	2	2	2	2
1381	2		1				2	1		1			1	1	1	2			1	1	2	1	1	1	1	2	1
1382	2		1				2	1					1	1	2	1	4	5	3	1	2	1	1	3	1	2	3	2	2	2	2	2	2	1	2
1383	2		1				2	1	1		1		2	1	1	1	1	1				1	1	1	1	2	1							1
1384	1		1				2	2	1	1	1		1	1	1	1	3	1				1	1	1	1	2	1							3	2	2	2	2	2	2
1385	1		1				2	2	1	1	1	1	1	1	1	1	4	6				1	1	1	1	2	1							1
1386	1	1					2	2	1				1	1	1	1	4	6	2	1	2	1	1	1	1	2	2	1	1	2	2	2	2	1
1387	2		1				2	2			1		2	2	1	1	3	5	1	1	2	1	1	1	1	2	3	2	2	2	2	2	2	2	1	2	2	1	1	2
1388	2		1					2					1	5	5	1	2	3	5	4	1	3	1	2	1	1	3	2	2	2	2	2	2	1
1389	1	1	1	1	1	NATIVE A	2	2		1	1		1	5	5	1	1	2	7	7	2	5	5	8	1	2	5	2	2	1	2	1	1
1390	2			1			2	2			1		2	1	1	2						1	1	1	1	2	1							2	2	2	2	2	2	2
1391	2		1				2	2	1	1	1	1	1	1	3	1	3	4	4	3	2	1	1	1	1	2	2	1	2	2	1	2		1
1392	2		1				2	2	1	1		1	1	3	3	1	2	5	4	2	1	1	1	1	1		2	2	2	1	2	1	1	1	2	2	2	2	2	2
1393	2		1				2	2		1			1	2	1	1	2	6	2	2	2	1	1	1	1	2	2	2	2	1	2	2	2	1
1394	1		1				1	2		1	1		2	2	5	1	2	4	2	2	2	2	1	2	1	2	2							2	2	2	2	2	2	2
1395	1		1				2	2	1	1			1	1	1	2						1	1	3	1	2	1							2	2	2	2	2	2	2
1396	2		1				2	2		1			1	2	3	1	1	4	5	4	2	1	1	1	1	2	3	2	2	2	2	1	1	1
1397	1		1				2	2					1	1	1	2						1	1	3	1	2	2							3	2	2	2	2	2	2
1398	2		1				2	2	1				1	1	1	1	4	5	2	1	2	1	1	1	1	2	2	2	2	2	2	1	2	1
1399	2		1				2	2		1			2	1	1	1	2	1				1	1	1	1	2	2	2	2	2	2	2	2	1
1400	1		1				2	2		1		1	1	1	1	1	3	1				1	1	2	1	1	2	2	2	2	2	2	2	2	2	1	2	2	1	1
1401	2	1	1					1		1			2	4	5	1	3	3	4	7	2	1	3			1								2	1
1402	1		1				2	1			1		1	1	1	1	3	1				1	1	1
1403	2		1				2	1	1	1		1	1	1	1	1	3	1				1	1	4	1	2	2	2	1	2	2	1	2	2	2	2	2	2	2	1
1404	2	1	1				1	1					1	1	1	1	4	5	1	1	2	1	1	1	1	2
1405	1		1				2	1					1	1	3	1	4	5	2	1	2	1	1	1	1	1	2	2	2	2	2	2	2	2	2	2	2	2	2	2
1406	2		1				2	1		1			1	1	1	1	1	5	2	1	2	1	1	8	1	2	3	2	2	2	2	2	2	1
1407	2		1				2	1			1			2	1	1	3	5	1	1	2	1	2	1	1	1	2							2	2	2	2	2	2	2
1408	2		1				1	1	1				1	5	3	1	1	2	4	2	2													1	2	2
1409	1		1				2	1		1			1	5	5	1	5	6	3	3	2	2	2
1410	2		1					1		1			2	5	4	1		5	3	1	2	1	1	1	1	2	4	1	1	1	1	1	1	3	1	1	2	2	2	2
1411	1		1				2	2		1			1	5	5	1	1	2	7	7	2	5	5	8	5	2	5	2	2	2	2	2	2	5	2	2	1	2	2	2
1412	1		1				2	2		1			1	1	1	1	1	3	4	2	2	1	1	1	1	2	2	2	2	2	2	2	2	2	1	1	2	2	2	2
1413	1		1				2	2	1				1	1	3	1	2	4	5	1	2	1	1	1	1	2	1	1	2	2	2	1	1	4	2	1	2	2	2	2
1414	2		1				2	2					5	2	5	1	1	3	1	1	1	3	5	1	1	1	1							2	2	2	2	2	2	2
1415	2		1				1	2			1		1	1	1	1	3	1				1	1	1	1	2	4	2	1	1	2	1	1	1
1416	1				1	HALF SPA	1	2		1			1	1	1	1	5	6	2	1	2	1	1	1	1	2								1
1417	2		1				1	2					1	5	3	1	4	5	2	2	2	1	1	1	1	1	1							1
1418	1		1				2	2	1		1	1	1	1	1	1	4	1				1	3	1	1	2	1							2	1	1	2	2	2	2
1419	1		1				2	2			1		1	1	1	1	5	1	1								1							5	2	2
1420	2			1			2	2			1			1	1	1	4	1				1	1	1	1	2	3	2	2	2	2	2	2	3	1	1	2	2	2	2
1421	2	1					2	1					2	1	1	2							1	3	1	2	5	2	1	2	2	2		1
1422	2		1				2	1		1	1	1	1	1	1	1	4	1				1	1	1	1	2	3	2	2	2	2	2	2	2	2	2	2	2	2	2
1423	2		1				2	1		1			2	1	1	1	1	5	1	1	2	1	1	1	1	2	1							1
1424	1		1				2	1		1			1	1	1	1	4	6	2	1	2	1	1	1	1	2	1							1
1425	2		1				2	1		1		1	1	1	1	1	4	1				1	1	1	1	2	2	2						1
1426	2		1				2	1			1		2	2	1	1	4	5	2	1	2	1	1	1	1	2	4	2	2	1	2	1	1	1
1427	1		1				2	1	1				1	1	1	1	4	1				1	1	1	1	2	1							2	2	2	2	2	2	2
1428	2		1				2	1		1		1	2	2	5	1	1	4	4	2	1	1	5	8	1	1	1							1
1429	1		1				2	1	1	1			1	1	1	1	1	3	2	1	2	1	1	1	1	2	1							1
1430	2		1				2			1			1	1	1	1	3	5	2	2	2	1	1	1	1	2	2	2	2	2	2	2	2	1
1431	1		1					1		1			2	1	1	2						1	1	2	1	2	2	2	2	2	2	2	2	3	2	2	2	2	2	2
1432	1		1				2	1		1			1	1	1	2						1	2	2	1	2	2							3	2	2	1	2	2	1
1433	1		1	1			1	1		1			1	1	1	2						1	1	1	1	2	1							3	1	1	2	2	1	1
1434	1		1				2	1			1		1	1	1	1	4	1				1	1	1	1	1	1							3	2	2	2	2	2	2
1435	2		1				2	1	1	1			1	1	1	2						1	2	1	1	2	1							2	2	2	2	2	2	2
1436	1		1				1	1	1				1
1437	1		1					1					1	1	1	1	3	4	1	1	2	1	1	1	1	2	1							1
1438	2			1			2	1	1				1	1	1	2						1	1	1	1	2	4	1	2	2	2	2	2	1
1439	2		1				2	1	1		1		1	1	1	2						1	1	1	1	2		2	2	2	2	2	2	1
1440	2		1				2	1	1		1		1	1	1	1	2	5	1	1	2	1	1	1	1	1	2	2	1	2	2	1	2	2	2	2	2	2	2	2
1441	1		1				2	1	1				1	1	1	1	3	4	1	1	2	1
1442	2		1				2	1		1			1	1	1	2						1	1	1	1	1	3	2	2	2	2	2	2	1
1443	2		1				2	1	1	1	1		1	1	1	1	3	1	1	1	2	1	1	1	1	2	2	2	2	2	2	2	2	1
1444	1			1			2	1			1		1	1	1	1	1	1				1	1	1	1	2	3	2	2	2	2	2	2	2	2	2	2	2	2	2
1445	2		1				2	1	1				1	1	1	2						1	1	1	1	2	2	2	2	2	2	2	2	2	2	2	2	2	2	2
1446	1		1				1	3					1	2	2	1	2	2	3	2	1	2	2	1	2	1	3	1	2	1	2	1	2	2	1	2	1	2	1	2
1447	1		1				2	3			1		2	2	3	1	1	5	4	3	2	1	4	8	1	2	1							2	2	2	2	2	2	2
1448	2		1				2	3					2	1	3	1	5	6	1	1	2	1	1	3	1	2	3	2	2	2	2	2	2	1	2	2	2	2	2	2
1449	2		1				2	1		1	1		1				4	5	1	2	2	1	1	2	1	1	4	2	2	2	2	2	2	1
1450	2		1				2	1		1		1	1	2	5	1	3	5	5	1	2	1	1	1	1	2	1							1
1451	2		1				2	1		1			2	2	2	1	4	5	5	4	2	1	1	1	1	2	3	2	2	1	2	1	2	1
1452	2		1				2	1	1		1		2	2	2	1	3	5	4	2	2	1	1	1	1	2	2	2	2	1	2	2	1	1
1453	2		1				2	3	1	1	1		1	1	1	1	4	1				1	1	1	1	2	3	2	1	2	2	2	2	1
1454	2		1				2	3		1			1	3	3	1	1	5	2	1	2	1	1	3	1	1	2	1	1	2	1	1	1	1
1455	1		1				2	3		1			1	1	5	1	2	5	2	2	2	1	1	1	5	1	5	2	2	1	1	1	1	5	1	2	1	1	1	1
1456	1		1				2	3	1				1	5	2	2							5	1			1							1
1457	2		1				2	1					2	2	2	1	4					1	1	1	1	1	3	2	2	2
1458	2		1				2	1	1		1		1	1	1	1	1	1				1	1	1	1	2	5	2	1	1	2	2	2	1
1459	2				1	HISPANIC	1	1		1	1		1	1	3	1	3	5	3	1	2	1	1	1	1	2	1							1
1460	1		1				2	1	1	1	1	1	1	1	1	1	1	1				1	1	1	1	2	3	2	2	2	2	2	2	2	2	2	2	2	2	2
1461	2		1				2	1		1			1	1	1	1	3	5	3	2	1		1	1	1	2	4	1	1	1	1	1	1	1			2	2	2	2
1462	1		1				2	2					1	1	1	1	4	6	2	1	2	1	1	1	1	2	1							2	2	2	2	2	2	2
1463	2		1				2	2	1	1		1	1	1	1	1	2	1				1	1	1	1	2	1							1
1464	1		1				2	2		1			1	1	1	1	4	5	2	2	2	1	1	1	1	2	1							3	2	2	2	2	2	2
1465	1	1					2	2		1			2	1	1	2						1	1	1	1	2	1							2	1	1	1	1	1	1
1466			1				2	2	1	1			1		1	1	4	6				1	1	1	1	2	1							2	2	2	2	2	2	2
1467	1		1				2	2	1	1	1	1	1	1	1	1	1	1				1	5	1	1	2	1							1
1468	1				1		1	2	1	1	1		1	1		1	5	6	1	1	2		1	1	1	2	2	1	2	2	2	2	2	1
1469	1		1				2	2		1		1	1	1	1	1	1	6	1	1	2	1	1	1	1	2	1							1
1470	2			1			2	2		1	1		1	1	1	1	3	1				1	1	1	1	2	2	2	2	2	2	2	2	1
1471	2		1				2	2					1	1	1	1	5	1				1	1	1	1	2	1							1
1472	2		1				2	2	1	1			1	1	1	1	4	5	2	1	2	1	1	1	1	2	2	2	2	2	2	2	2	1
1473	2		1				2	2	1	1			1	1	1	1	4	6	7	1	2	1	1	1	1	2	3	2	2	2	2	2	2	1
1474	2		1				2	2	1		1	1	1	1	1	1	5	1				1	1	1	1	2	2	2	2	2	2	2	2	1
1475	2		1				2	2		1	1		2		4	1	1	4	3	1	2	1	1	1	1	1	1							2
1476	1		1				2	2	1	1	1	1	2	1	3	1	1	6	1	1	2	1	1	1	1	1	1							1
1477	1		1					2		1		1	1	5	2	2						5					1							5	1	1	1	2	1	1
1478	1				1		1	2		1			1	5	5	1	2	3	4	3	2	2	2	1	1	2	1							1	1	1	1	1	1	1
1479	1		1				2	3		1	1		1	1	2	1	4	5	4	2	2	1	2	2	1	2	1							2	2	2	2	2	2	2
1480	2		1				2	3	1	1	1	1	1	2	2	1	1	3	3	1	2	1	1	1	1	2	2	2	1	2	2	2	2	1
1481	2		1				2	3	1	1	1	1	1	1	1	1	1	5	4	2	2	1	1	1	1	2	2	1	2	1	2	2	2	1
1482	2		1				2	1	1		1	1	1	1	1	1	4	1				1	1	1	1	2	2	1	1	2	2	1	1	1
1483	2		1				2	1		1			1	1	1	1	2	3	1	1	2	1	1	1	1	2	3
1484	2		1				2	1		1			2	2	1		2	3	3	1	2	1	1	1	1	1	3	2	2	1	2	1	1	1
1485	1		1				2	1		1			1	1	1	1	3	1				1	1	1	1	2	1	2	2	2	2	2	2		2	2	2	2	2	2
1486							1	1	1	1		1	1	5	5	1	1	2	7	7	1	5	5	8	5	2	5	2	2	1	1	1	1	5	2	2	1	1	1	1
1487	2				1	INDIAN	2	1	1				1	1	1	2						1	1	1	1	2	4	2	1	2	2	2	2	1
1488	1		1				2	1		1	1		1		1	2						1	1	1	1	2	1							5
1489	1		1				2	1	1		1	1	1	1	1	2						1	1	1	1	2	1							1
1490	2				1	SPANISH	1	1	1				1	1	1	2				1	2	1					3	1	2	1	2	2	2	1			2	2	2	2
1491	1		1				2	3	1	1	1	1	1	1	1	1	4	7	2	1	2	1	1	1	1	2	1							1
1492	1	1					1	1		1			1	2	2	1	2	6	2	1	2	4	1	1	1	2	1	2	2	2	2	2	2	1	1	1	2	2	1	1
1494					1	PACIFIC				1	1		1	1	1	1	4	1	1	1	2	1	1	1	1	2	5	1	2	2	2	2	2	5	2	2	2	2	2	2
1495	1		1				2	3		1			2	2	2	1	4	6	2	1	2	1	1	1	1	2	2	2	2	2	2	2	2	2	2	2	2	2	2	2
1496	1		1				2	1	1				4				1	5	5	2	1	1
1497	1		1				2	1		1			1	1	3	1	4	5	5	3	2	1	1	1	1	2	2							1
1498	2		1				2	2		1	1	1	1	1	1	1	1	1				1	1	1	1	1	2	2	2	2	2	2	2	2	2	1	2	2	2	2
1499	2		1				2	2					1	5	4	1	3	5	1	1	2	2	1	2	1	2	2	2	2	2	2	2	2	1
1500	1		1				2	2		1			1	1	5	2						1	2	1	1	1	1							5	2	2	2	2	2	2
1501	2		1				2	2					1	1	1	1	1	2	1	1	2	1			1	2	1							2	2	2	2	2	2	2
1502	1		1				2	1		1			1	2	3	1	3	4	4	4	2	1	3	2	2	2	2	2	2	2	2	2	2	1
1503	1		1				2	1	1	1	1	1	1	1	1	1	5	1	1	1	2	1	1	1	1	2	3	2	2	2	2	2	2	2	2	2	2	2	2	2
1504	1		1				2	1		1			1	1	1	2						1	1	1	1	2	2	2	2	2	2	2	2	1
1505	2		1				2	1		1	1		1	1	1	1	4	5	1	1	2	1	1	1	1	2	3	2	2	1	2	2	2	1
1506	2		1				2	1	1		1		1	1	1	1	4	4	2	1	2	1	1	1	1	2	4	2	2	1	1	2	1	1
1507	1		1				2	1		1			1	1		1		1																2	2	1	2	2
1508	2		1				2	1	1		1	1	1	2	1	1	4	1				1	1	1	1	2	3	2	2	2	2	2	2	1	2	2	2	2	2	2
1509	1		1				2	1		1	1		1	1	1	1	4	5	1	1	2	1	1	1	1		3	1	1	2	1	2	2	1	1	2	1	2	1	2
1510	2		1	1			2	1		1	1		2	1	2	1	3	4	4	4	2	1	1	1	1	2	3	2	2	2	2	2	2	5	2	2	2	2	2	2
1511	1		1				2	1		1	1		1	1	1	1	2	5	2	2	2	1	5	2	1	2	1							3	2	2	1	2	1	1
1512	2	1					1	1		1			1			2						1	1	1	1
1513	1		1				2	1		1			1	1	1	2	1	1	1	1	2	1	1	1	1	2	1	2	2	2	2	2	2	1	2	2	2	2	2	2
1514	2		1				2	1					1	1	1	1	4	5	2	2	2	1	1	1	1	2	2	2	2	2	2	2	2	1
1515	1		1				2	1		1			2	1	1	1	4	5	2	2	2	1	1	2	1
1516	2		1				2	1						2	3	1	4	5	4	2	1	1	1	1	1	2	5	2	1	1	2	1	1	1
1517	1		1				2	1		1			2	1	1		5	6					1	1	1	2	1	2	2	2	2	2	2	1	2	2	2	2	2	2
1518	1		1				2	1		1		1	2	1	1	1	4	1	1	1	2	1	1	3	1		3	2	2	2	2	2	2
1523	1		1				2	2	1	1		1	1	1	1	2						1	3	1	1	1	4		1	1	2	1	2		1	1	2	1	2	1
1524	2		1				2	2	1	1			1	1	1	1	4	1	1	1	2	1	1	1	1	2	2	2	2	2	2	2	2				2	2	2	2
1525	2		1				1	2	1				2	4	3	1	1	6	5	2	2	1	1	1	1	1	3	1	1	1	1	1	1	1
1526	1		1				2	2				1	2	1	1	1	4	6	1	1	2	1	1	1	1	2	1							1
1527	1		1				2	2		1	1		2	1	1	2						1	1	1	1	2	1							1
1528	2		1				2	2	1			1	2	1	2	1	4	6	2	2	2	1	1	3	2	2	2	2	2	2	2	2	2	1
1529	2			1			1	2	1				2	4	3	1	4	1	5	3	2	2	1	2	3	1	1							1
1530	1		1				2	1		1			2	1		1	1	5	2	1	2	1	1	1	1	2	1
1531	2		1				2	1		1		1	2	1	1	1	4	6	2	1	2	1	1	1	1	2	2	1	2	2	2	2	2	1
1532	2		1				2	1		1	1		2	1	1		4	1	2	1	2	1	1	1	1	2	3	2	2	1	2	2	2	1
1533	2		1				2	1					1	2		1	4	5	1	1	2	1	1	1	1	2	2	2	2	2	2	2	2	1
1534	1		1				1	1		1			2	1		1	1	4	4	4	2	1
1535	2		1				2	1	1		1		5	1	1	1	3	1	1	1	2	1	1	1	1	2	2	2	2	2	2	2	2	3	2	2	2	2	2	2
1536	2		1				2	1	1			1	1	2	1	1	4	6	1	1	2	1	1	2	1	2	4	2	2	2	2	2	2	1
1537	1		1				2	1		1			1	1	1	1	4	5	1	1	2		1	1	1	2	2							2
1538	1		1					1					1	1	1	2						1	1	1	1	2	2							3	2	2	2	2
1539	1				1	MEXICAN	1	1	1	1	1		1	1	1	1	3	1				1	1	1	1	2
1540	2	1					2	1				1	2	3	2	1	1	2	2	1	2	1	1	1	1	2	4	2	2	2	2	2	2
1541	1		1					1	1	1	1	1	2	1	1	1	4	5	1	1	2	1	2	1	1	1	1
1542	2		1				2	1	1	1		1	2	1	1	1	1	5	4	1	2	1	5	4	1	1	3	2	1	1	2	1	2	1
1546	1		1				2	1		1			1	3	5	1	1	3	3	2	2	3	5	3	5	1	1	2	1	2	2	2	2	1
1547	2		1				2	1		1			1	2	3	1	4	5	4	4	2	1	1	1	1	2	2	2	2	1	2	2	2	1
1548	2		1				2	1	1			1	1	1	1	2						1	1	1	1	2		2	2	2	2	2	2	2	2	2	2	2	2	2
1549	2		1				2	1	1		1	1	2	4	5	1	1	4	7	5	2	4	3	7			1	1		1		2
1550	2		1				2	1		1			1	1	1	1	4	5	1	1	2	1	1	1	1	2	3	2	1	1	2	2	2	1
1551	2		1				2	1		1			1	1	4	1	5	6	7	5	2	1	1	1	1	2	1	2
1552	2		1				1	1		1			1	3	5	1	3	4	4	7	1	5	5	8	3	2	3	2	2	2	2	2	2
1553	2		1				2	1	1	1			2	1	1	1	3	5	1	1	2	1	1	1	1	2	2	2	2	2	2	2	2	1
1554	2		1					1	1			1	1	2	3	1	3		3	1	2	1	1	1	1	1		2						1
1555	2		1				2	1		1			1	1	3	1	3	5	5	3	2	1	1	3	2	2	1							1
1556	2		1				2	1		1	1		1	1	1	1	2	6	1	1	2	1	1	1	1	2	2	1	1	2	2	2	2	1
1557			1		1		2	1	1	1		1	1	1	1	2						1	1	1	1	2	3	2	2	2	2	2	2	2	2	2	2	2	2	2
1558	2		1				2	1		1			1	1	1	1	2	1				1	1	1	1	2	2	2	2	2	2	2	2	2	2	2	2	2	2	2
1559	2			1			2	1	1		1	1	1	1	1	1	4	1				1	1	1	1	2	3	2	2	2	2	2	2	1
1560	2		1				1	1		1			2	3	3	1	3	5	4	2	2	1	1	1	1	2	2	2	2	1	2	1	1	1
1561	2		1				2	1		1			1	1	1	1	4	1				1	1	1	1	2	2	2	2	2	2	2	2	2	1	1	2	2	2	2
1562	2				1		2	1		1				1	1	2	1	1	1	1	2	1	1	1	5	1	2	1	1	2	1	1	1
1563	1		1				2	1		1		1	1	1	1	1	4	5	1	1	2	1	1	2	1	2	1							4	2	2	2	2	1	1
1564		1	1	1			1	1					1	5	5	1	1	2	7	7	1	5	5	8	5	1	5	2	2	2		2	2	5	2	2	2	2	2	2
1565	1		1				2	1		1			5	1	1	1	2	5	1	1	2	1	1	3	1	2	1							1
1566	2		1				2	1					2	5	5	1	1	2	7	7	1	5	5	8	5	1	5	2	2	2	2	2	2	5	2	2	2	2	2	2
1567	2		1				2	1					1	5	5	1	3	4	7	2	2	5	5	4	1	2	5	2	1	2	2	1	2	5	2	2	2	2	2	2
1568	2		1				2	1					1	4	5	1	1	2	4	4	1	1	3	2	2		5	2	2	1	1	1	2	1
1569	2		1				2	1		1	1		1	1	2	1	4	1	1	1	2	1	1	1	1	2	5	2	2	1	2	1	2	1
1570	2		1				2	1	1				2	1	2	1	2	5	2	1	2	1	1	1	1	2	4	2	2	1	2	1	2	2	2	2	2	2	2	2
1571	2				1	PUERTO R	1	1		1	1		1	1	5	1	4	5	1	1	2	1	1	2	1	2	5	2	2	1	2	1	2	1
1572	2		1				2	1		1			2	1	1	1	3	1	1	1	2	1	1	1	1	2	2	2	2	2	2	2	2	1			2	2	2	2
1573	2		1				2	1					1	1	1	1	4	1				1	1	1	1	2	1							2	2	2	2	2	2	2
1574	1		1				2	1	1	1	1	1	2	1	1	1	4	5	3	2	2	1	1	1	1	2	2	2	2	2	2	2	2	2	1	2	2	2	2	2
1575	2		1				2	1		1			1	2	1	1	4	5	3	1	2	1	1	2	1	1	2	2	2	2	2	1	2	1
1576	2		1				2	1	1				1	1	1	1	2	1				1	1	1	1	2	2	2	1	2	2	1	1	1
1577	2		1				2	1					1	1	1	1	1	4	1	1	2	1	1	1	1	2	2	2	1	2	2	1	1	2	2	2	2	2	2	2
1578	2	1	1				2	1					1	2	1	1	2	4	2	2	2	1	1	1	1	2	3
1579	1		1				2	3	1	1	1		1	5	5	2	1	2	7	7	2	5	5	8	5	1
1580	2		1					1		1			1		3	1	2	5	4	3	2	1	5	1	1	2		1	2	2	2	2	2
1581	1		1				2	3		1			4
1582	1		1				2	3		1			2
1583	2		1				2	3	1	1	1	1	1	1	2	1	1	5	3	1	2	1	1	1	1	2	2	2	2	1	2	2	2	1
1584	2		1				2	3	1		1	1	1	5	4	1	4	5	4	4	2	2	1	1	1	2								1
1585	1				1	AFGHAN	2	3					1
1586	2		1				2	3		1			1	5	5	1	2	4	5	4	2	3	1	1	1	1	1							1
1587	2		1				2	3					1	5	3	1	4	5	2	2	2	1	1	2	1	2	1							1
1588	2		1				2	3	1	1	1		1	1	1	1	5	6	1	1	2	1	1	1	1	2	2	2	2	2	2	2	2	1
1589	2		1				2	3		1			2	3	3	1	4	5	4	3	2	1	1	1	1	2	2	2	2	1	2	1	2	1
1590	2		1				2	3			1		1	1	3	1	4	5	3	2	2	1	1	1	1	2	2	2	2	2	2	2	2	1
1591	1		1				2	3					1			1	1	2	7
1592	2		1					3					2	5	5	1	4	5	3	3	2	2	3	1	1	1	3	2	2	2	1	2	2
1593	2				1	NATIVE A	2	3	1		1		1	5	4	1	1	5	5	4	2	2	1	1	1	2
1594	2		1				2	3					1	5	4	1	4	5	5	3	2	4	1	2	1	2	2	2
1595	1		1				2	3	1	1	1		1	2	3	1	1	2	4	4	2	1	1	1	1	2	2	2	2	2	2	2	2	1	2	2	2	2	2	2
1596	2		1				2	3		1	1		1	4	4	1	4	5	5	5	2	2	1	1	1	1	2	2	2	2	2	2	2	1
1597	2		1				2	3		1			1	1	1	1	4	6	5	5	2	1	1	1	1	2	2	2	1	2	2	2	2	1
1598	1		1				1	1		1			1	1	1		1	2	7	3	1	1	1	1	1	1	1
1599	2	1	1				2	1			1		1	1	1	1	3	6	5	1	2	1	2	1	1	2	1							3	2	2	1	2	1	1
1600	2		1				2	3		1			1	3	3	1	3	4	2	2	2	1	1	1	1	2	2	2	1	1	1	2	1	1
1601	2		1				2	3	1	1		1	1	1	3	1	1	5	3	2	2	1	1	1	1	2	2	2	2	2	2	2	2	1
1602	2		1				2	3	1	1			1	1	1	1	3	6	2	1	2	1	1	1	1	2	3	2	2	2	2	2	2	1
1603	2		1				2	3	1	1	1		1	2	2	1	3	6	5	1	2	1	1	1	1	2	3	2	2	2	2	2	2	1
1604	1		1				2	3	1	1	1		1	2	4	1	2	6	3	2	2	1	1	1	1	2	2	2	2	2	2	2	2	2	1	1	2	2	1	1
1605	2		1				2	1		1			1	2	1	1	4	5	2	1	2	1	1	1	1	2	2	2	2	2	2	2	2	1
1606	2	1		1	1		1	1				1	6	1	2	1	4	5	7	7	1	5	1	8	1	2	1							1
1607	1		1				2	1		1			1	1	1	2						1	1	1	1	2	1							2	2	2	2	2	2	2
1608	1						2	1		1			1	1		1	5	6	7	2	2	1	2	1	5
1609	1				1		2	4				1	6	5	5	1	1	2	7	5	2	3	5	7	2	1	1	1	1	1	1	1	1	5	1	1	1	1	1	1
1610	1		1				2	1		1			1	1	1	1	4	1				1	1	1	1	2	1							1
1611	1		1				2	1		1			1	1	1	1	4	6	2	2	2	1	1	1	1	1	1							1
1612	1		1				2	1		1			2	2		1	2	3	2	2	2	1	2	1	2	2								1
1613	2	1					2	1					6	1	1	2						1	1	2
1614	2				1	LATIN	2	1			1		2	1	1	1	2	3	2	2	2	1	1	2	1	2	2	1	1	2	2	2	2	2	2	1	2	2	2	2
1615	1		1				2	1		1			1	1	1	1	3	1				1	1	2	1	2	1							3	2	2	2	2	2	2
1616	2		1				2	1				1	1	1	1	2						1	1	1	1	2	1							2	2	2	2	2	2	2
1617	2		1				2	1					1	1	1	1	2	5	1	1	2	1	1	1	1	2	1	2	2	2	2	2	2	2	2	1	2	2	2	2
1618	1		1				2	1		1			2	1	1	2						1	1	2	1	2	1	2	2	2	2	2	2	2	2	2	2	2	2	2
1619	2		1				2	1		1	1		1	1	1								1	1	1	2	2	2	2	2	2	2	2	1
1620	2		1				2	1		1			1	1	1	2						1	1	1	1	2	2	2	2	2	2	2	2	1
1621				1			2	1	1	1	1		1	1	1	1	4	5	1	1	2	1	1	1	1	2	2	2	2	2	2	2	2	1
1622	2	1		1	1	PUERTO R	1	1				1	2	2	1	1	3	4	3	3	1	1	3	4	4	2	5	2	1	1	1	1	1	1	1	1	2	2	2	2
1623	2		1				2	1	1				2	3		1	3	4
1624	2	1					2	1	1	1			2	1	1	2						1					3	2	2	2	2	2	1	3	2	1	2	2	1	1
1625	1		1					1		1			1	1	1	2						1	1	1	1	2	1	2	2	2	2	2	2	2	2	2	2	2	2	2
1626	1		1				2	1		1			1	1	1	1	2	5	1	1	2	1	5	3	1	2								2	2	1
1627	1		1				2	1					1	2	1	1	3	5	1	1	2	1	3	2	1	2	2	2	2	2	2	2	2	4	2	1	2	2	2	2
1630	1		1				2	1		1			1	2		1	5	6	1	1	2		1	2	1	2	1							2	1	2
1631	1		1				1	1		1			1	1	1	1	4	1	1	1	2	1	1	1	1	2	1	2	2	2	2	2	2	5	1	1	2	2	2	2
1632	1		1				2	1	1				1	1	1	1	1	1	1	1	1	1	1	1	1	1	1	1	1	1	1	1	1		1	1	1	1	1	1
1633	1		1				2	1	1	1			1
1634	2		1				2	1	1	1			1	1	1	1	4	5	3	2	2	1	1	1	1	2	3	2	2	2	2	2	2	1
1635	1		1				2	1				1	2	2	1	1	2	5	1	1	2	1	4	3	1	2	3	2	2	2	2	2	2	2	2	2	2	2	2	2
1636	2		1				2	1		1			1	1	1	1	4	5	3	1	2	1	1	1	1	2	2	2	2	2	2	2	2	1
1637	2		1				2	1		1			1	3	3	1	3	4	3	1	2	1	1	2	1	2	3	2	1	1	1	1	1	1
1638	2		1				2	1		1			2	1	2	1	4	5	2	1	2	1	1	1	1	2	2	2	2	2	2	2	2	1
1639	1		1				2	1					1	1	1	1	1	2	1	1	2	1	1	1	1	2	1	1	1	1	1	1	1				2	2	2	2
1640	1		1				2	1		1			1	1	1	1	4	5	1	1	2	1	1	1	1	2	1	2	2					2	2	2	2	2	2	2
1641	2		1				2	1			1		1	1	1	1	4	1				1	1	1	1	2	2	2	2	2	2	2	2	2	2	1	2	1	1	1
1642	1				1	PERUVIAN	1	1	1	1		1	2	1	1	1	1	4	2	1	2	1	1	2	1	1	2	2	1	1	1	1	1	2	2	2	2	2	2	2
1643	2		1				2	1		1			1	1									1	1	1	2	3	2	2	2	2	2	2	2	2	2	2	2	2	2
1644	2		1				2	1					1	1	1	2						1	1	1	1	2	2							2	2	2	2	2	2	2
1645	2		1				2	1		1			2	1	1	2						1	1	1	1	2	2	2	2	2	2	2	2	1
1646	2		1				2	1	1	1	1	1	1	1	1	1	1	1				1	1	2	1	2	1							1
1647	2		1				2	1		1			1	1	1	1	3	1				1	1	1	1	2	1							2	1	2	2	2	2	2
1648	2		1				2	1			1			1	1	1	4	1				1	1	2	1	2	1							1
1649	1		1				2	1		1			1
1650	2			1			2	1			1		2	1	1	1	2	1				1	1	1	1	2	2	2	1	2	2	1	2	2	2	2	2	2	2	2
1651	1		1				2	1		1			1	1	2	1	4	5	2	1	2	1	1	1	1	2	2	2	2	2	2	2	2	1
1652	1		1				2	1	1	1		1	1	1	1	1	1	6	1	1	2	1	5	1	1	2	1							2	1	1	2	2	2	2
1653	1	1					2	1		1			1	1	4	1	5	6	1	1	2	1	4	8	1	2	2	2	2	2	2	2	2	1
1654	1		1				2	1	1		1	1	1	1	1	1	4	1	1	1	2	1	1	1	1	1	2	2	2	2	2	1	2	2	2	2	2	2	2	2
1655	1		1				2	1		1	1		1	1	1	1	2	6	1	1	2	1	1	3	1	2	3	2	2	2	2	2	2	1
1656	2		1				2	1		1	1	1	1	1	1	1	4	1				1	1	1	1	2	1							2	2	2	2	2	2	2
1657	2		1				2	3			1		1	3	4	1	3	4	4	3	1	4	1	2	1	2	3	2	2	2	2	2	2	1
1658	2		1				2	3	1	1	1	1	1	2	3	1	4	6	3	2	2	1	1	1	1	2	2	2	2	2	2	2	2	1
1659	2		1				2	3	1	1	1		1	1	1	1	3	5	3	2	2	1	1	1	1	2	2	2	2	2	2	2	2	1
1660	1		1				2	3		1	1		1	1	1	1	3	4	4	4	2	5	5	8	1	2	1							2	2	2	2	2	2	2
1661	1				1		1	1				1	1	1		1	1	2			2	1	4	1		2	1	2	2	2	2	2	2	2			2	2	2	2
1662	1		1				2	1					1	2	3	1	1	4	2	1	2	1	1	1	1	2	1							2	2	2	2	2	2	2
1663	1		1		1	MIXED		1					1	1		1	1	1	1	7	2	1	1	8	1	1	1	2	2	2	2	2	2	5	2	2	2	2	2	2
1664	1		1				2	1		1			2	2	2	1	1	2	2	2		1	1	8													1	2	2	2
1665	2		1				2	1		1			1	1	1	1	4	1				1	1	1	1	2	2	2	2	2	2	2	2	1
1666	1		1				2	1	1		1		1	1	1	1	4	1	1	1	2	1	1	2	1	2	1							2	2	1	2	2	2	2
1667	2		1				2	1		1	1		1	1	3	1	4	5	5	2	2	1	1	1	1	2	4	1	1	2	1	2	2	1
1668	2		1				2	1		1			1	1	1	1	1	5	1	1	2	1	1	1	1	2	2	2	2	2	2	2	2	1
1669	2				1	HISPANIC	1	1		1			2	1	1	1		1				1	1	1	1	2	1								2	1	2	2	2	1
1670	2		1				2	1		1		1	1	1	1	1	2	5	2	2	2	1	1	1	1	2	2	2	2	1	2	1	1	1
1671	2		1				2	1		1			1	1	1	2						1	1	1	1	2	2	1	1	2	2	1	2	1
1672	2		1				2	1		1	1		1	1	1	1	4	5	1	1	2	1	1	1	1	2	4	1	1	1	1	1	1	1
1673	1		1				2	3		1			1			1	5	6	2	2	2	1	1	1	1	2	2	1	2	2	2	2	2	1
1674	1		1				2	3		1
1675	1		1				1	3		1	1		2	5	5	1	4	5	5	5	2	1	1	1	5	1								4	2	1	1	1	1	1
1676	2		1				2	3					2	3	2	1	4	5	2	3	2	4	1	3	1	2	3	2	2	2	2	2	2	1
1677	1		1				2	3	1	1	1		1	1	1	1	5	6	1	1	2	1	1	1	1	2	2							3	1	1	1	1	1	2
1678	1		1				2	3		1			1	1	1	1	3	5	4	4	2	1	1	1	1	2	1							1
1679	1		1				2	3		1			1	1	1	1	5	6	3	1	2	1	1	1	1		2	2	2	2	2	2	2	2	2	2	2	2	2	2
1680	1		1				1	3	1	1	1		1	5	5	1	1	2	5	4	1	3	5	8	1	2	1							2	2	2	2	2	2	2
1681	2		1				2	3	1		1		1	1	1	1	5	6	3	2	2	1	1	1	1	2	2	2	1	2	2	2	1	1
1682	2		1				2	3					1	1	2	1	4	5	3	1	2	1	1	1	1	2	2	2	2	2	2	2	2	1
1683	2		1				2	3		1	1		1	3	1	1	4	6	5	5	2	1	1	1	1	1	4	2	1	1	2	1	2	1
1684	1				1		1	3					6	1	1	2					2	1					2								2
1685	2		1				2	3			1		1	2	1	1	2	6	2	1	2	1	1	1	1	2	4	2	1	1	2	2	2	1
1686	1		1				2	3					1	1	2	1	1	4	7	7	2	5	5	8	1	2	5	2	2	2	2	2	2	3	2	1	2	2	2	2
1687	1		1				2	4					4	3	5	1	1	6	5	5	2	1	1	1	1	1	2	2	1	2	2	2	2	4	2	2	1	2	2	2
1688	1		1				2	3				1	2	1	5	1	3	2	7	7	2	1	5	1	1	2	1							1
1689	2		1				2	3		1	1	1	2	1	1	1	4	5	2	2	2	1	1	1	1	2	2	2	2	2	2	2	2	1	2	2
1690	2		1				2	3	1				1	1	1	1	5	1				1	1	1	1	2	2	2	2	2	2	2	2	1
1691	2		1				2	3	1		1	1	1	4	3	1	2	5	2	1	2	1	1	1	1	2	2	2	2	2	2	2	1	1
1692	1		1				2	3			1		2	1	1	1	3	6	2	1	2	1	1	1	1	2	1							2	2	2	1	2	2	2
1693	1		1				2	3				1		1	1	1	1	5	5	5	2	1	2	7	5	2	5	1	2	2	2	2	2	5	2	2	2	2	2	2
1694	1		1				2	3	1				1	1	1	1	1	6	1	1	2	1					1							4	2	2	2	2	2	2
1695	1	1					2	3					1	3	3	1	2	5	1	1	1	2	1	1	1	2	1							2	2	2	2	2	2	2
1696	1		1				2	3	1		1		1	1	1	1	2	1				1	2	1	1	2	3	2	1	2	2	1	2	2	2	2	2	2	2	1
1697	1		1				2	3		1		1	1	1	1	1	1	5	1				1	1	1	2	1							5	2	2	2	2	2	2
1698	1				1	ITALIAN	1	3		1	1		1	1	1	1	1	3	6	6	2	1	3	2	4	2	1							4	2	2	2	2	2	2
1699	1	1					1	3						4	5	1	1	2	7	7	2	5		1	1	1	1	2	2	1	1	1	1	5	2	2	2	2	2	2
1700	1		1				2	3					1			1	1	6	1	1		1	2	1		1	1							2	1	1	2	2	2	2
1701	1		1				2	3	1	1	1		1	3	2	1	1	4	3	3	2	1	5	8	5	2	2	2	2	2	2	2	2	2	2	2	2	2	2	2
1702	2		1				2	3	1	1	1		1	1	1	1	5	1				1	1	1	1	2	3	2	2	2	2	2	2	1
1703	2		1				2	3		1	1	1	1	1	1	1	4	1				1	1	1	1	2	2	2	2	2	2	2	2	1
1704	1		1				2	1		1			1	1	3	1	4	5	2	2	2		1	3	1	2	2	2	2	1	2	2	2	2	2	1	2	2	2	2
1705	1		1				2	3	1	1	1		2	2	4	2
1706	1		1				2	1			1		1	5	5	1	1	2	7	7	1	5	5	8	5	1	1	2	2	2	1	2	2				1	1	1	1
1707	1		1				1	1		1			2	5	5	2						5	5	8	5	2	5	1	1	1	1	1	1	5	2	2	2	2	1	2
1708	1				1	HISPANIC	1	1		1			1	1	1	1	4	5	1	1	2	1	1	2	1	2	1							1	2	2	2	2	2	2
1709	1		1				2	1		1			1	1		1	1	1	1				5	8			5	2	2	2	2	2	2	2	2	2	2	2	2	2
1710	1			1			1	1		1			1	1	1	1	4	5	3	2	2	1	5	3	2	2
1711	2		1				2	1	1	1			1	1	1	1	3	1				1	1	3	1	2	4	2	1	2	2	1	2	1
1712	2		1	1			2	1		1			2	1	1	1	4	5	1	1	2	1	2	1	1	2	5	2	2	1	2	1	1	3	2	2	2	2	2	2
1713	1		1				2	1				1	1	1	1	1	4	1				1	1	1	1	2	4	2	2	1	2	2	2	2	2	2	2	2	2	2
1714	2		1				2	1					1	2	1	1	3	4	1	1	2	1	1	1	1	2	5							5	1	1	1	1	1	1
1715	2		1				2	1		1		1	1	1	1	1	4	1				1	1	1	1	2	2	2	2	2	2	2	2	1
1716	1		1					1		1			2	3	4	1	4					1	1	4	1	2								1
1717	1		1				2	1	1		1		1	1	1	1						1	3	1	1	2	1	2	2	2	2		2	3	2	2	2	2	2	2
1718	1		1		1	HISPANIC	1	1		1		1	1	1	1	2						1	1	1	1	2	1							5	2	2	2	2	2	2
1719	1		1				2	1		1			1	1	1	1	3	1				1	1	3	1	2	1							3	2	2	2	2	2	2
1720	1		1				2	1					2	1	1	1	1	1				1	3	1	1	2	2	1	2	2	2	2	2	2	2	2	2	2	2	2
1721	1		1				2	1					2	1	1	1	4	1				1	1	1	1	2	1							3	2	2	2	2	2	2
1722	2		1				2	1		1			1	2	1	1	2	3	2	2	2		1	2	1	2	4	2	2	2	2	2	2	2
1723	1		1				2	1		1			1	1	1	1	5	6	1	1	2	1	4	1	1	2	1							2	2	2	2	2	2	2
1724	2		1				2	1		1	1		2	3	2	1	3	5	4	2	2	1	1	1	1	2	2	2	2	1	2	2	2	1
1725													2			1	1	1		4	1	1	2	5	1	1	1	1	2	1		2	1				1	1	2	2
1726	2		1				2	1		1			1	1	2	1	1	4	3	2	2	1	1	1	1	2	2	2	2	1	2	2	1	1
1727	2		1				2	1					1	3	4	1	1	3	5	3	1	2	1	3	1	1	3	2	2	1	2	2	2	1	2	2	2	2	2	2
1728	1		1					1		1			2	1	1	2						1	1	1	1	2	1							3	1	2	2	2	2	2
1729	1		1				2	1		1			1	1	2	1	1	5	3	3	2	5	5	8	5	2	2	2	2	2	2	2	2				1	1	2
1730	1		1				2	1				1	2	1	5	1				1	2	1	5	2	1	2		1	2	2	2	2	2	4	1	1	1		2	1
1731	2				1	AMERICAN	2	1			1		1	5	3	1	4	5	1	1	2	1	1	2
1732	2		1				2	1					1	5	5	1	1	2	7	5	1	2	3	8	1	1
1733	2		1				2	1					1	4	3	1	1	6	1	1	2	1	5
1734	1		1				2	1		1			1	1	1							1	1	2	1	2	2	2	2	2	2	2	2	2	2	2	2	2	2	2
1735	2		1				2	1					2	5	5	1	4	5	3	3	2	2	4	4	2	1	1							1
1736	2		1				2	1		1		1	1	1	1	1	1	5	2	1	2	1	1	1	1	2	2	2	2	1	1	1	1	1
1737	2	1	1				2	1					1	1	1	2						1	1	1	1		1							1
1738	2		1				2	1	1	1	1	1	1	1	1	1	2	5	2	1	2	1	1	2	1	2	5	2	1	1	1	1	1	3	2	1	1	1	1	1
1739	2				1	HISPANIC	1	1		1			4	1	1	1	2	5	2	1	2	1	1	1	1	1	4	2	2	1	2	1	1	1
1740	2		1				2	1					2	2	2	2						1	1	3	1		3	2	2
1741	2		1					1					1	1	1	1	3	5	1	1	2	1	1	1	1	1	3	2	1	1	2	2	2	1
1742	1		1				2	1		1			1	1		1	4	6	4	2	2	1	1	1	1	2								1	2	2	1	1	1	1
1743	1		1				2	3	1	1	1		1	2	2	1	3	5	3	3	2	1	1	1	1	2	2	2	2	2	2	2	2	1
1744	1				1	HISPANIC	1	3					1	1	1	1	3	6				1	1	1	1	2	1	2	2	2	2	2	2	1
1745	2		1				2	4					1	5	2	1	2	5	3	3	2	1	1	1	1	2	2	2	2	1	2	2	2	2	2	2	2	2	2	2
1746	2				1	HISPANIC	1	3	1		1		1	2	4	1	4	6	1	1	2	1	1	1	1	2	2	1	1	2	2	2	2	1
1747	2				1	EUROPEAN	2	3				1	3	4	3	1	1	2	5	5	2	1	1	1	1	1	2	2	1	2	2	1	1	2	2	2	1	2	2	2
1748	1		1				2	3		1	1	1	1	1	1	1	1	5	2	1	2	1	4	5	1	2	2	2	2	2	2	2	2	2	2	2	2	2	2	2
1749	2		1				2	3	1				2
1750	2		1				2	4					1	3	2	1	4	5	2	2	2	1	1	1	1	2	4	2	1	1	1	2	2
1751	2		1				2	3	1		1		1	1	1	1	1	5	5	1	2	1	1	1	1	2	2	2	2	1	2	2	2	1
1752	1		1				2	3					1	1	5	1	5	6	2	2	2	1	1	1	1	2	5							3	1	1	1	1	1	1
1753	1		1				2	3		1	1		1	1	1	1	5	6	2	2	2	1	1	1	1	2	1							1
1754	1				1	HISPANIC	1	2			1		1	2	1	1	1	2	3	4	1	1	5	4	5	1	5	2	2	2	2	2	2	5	2	1	1	1	1	1
1755	1			1			2	2			1		1	5	5	1	1	2	7	3	1	2	5	8	2		5	1	2	2	2	2	2	5	1	2	1	1	1	1
1756	1				1	HISPANIC	1	3					2	3	3
1757	2			1			1	1	1	1			1	2	5	1	3	2	5	3	1	2	5	6	5	1	5	1	1	1	1	1	1		1	2	1	2	1	1
1758	1		1				2	3			1		1
1760	2			1			2	3	1		1		1	5	3	1	1	5	1	1	2	1	1	1	1	2	1							1
1761	2		1				2	3					1	2	3	1	4	5	3	2	2	1	1	1	1	2	3	2	1	2	2	1	2	2	2	2	2	2	2	2
1762	2		1				2	3			1		1	1	1	2						1	1	1	1	1	1	2	2	2	2	2	2	1
1763	1			1			2	3					2	1	1	1	1	1	1	1	1	1	1	1	1	1	1	1	1	1	1	1	1	1	1	1	1	1	1	1
1764	1		1				2	3		1			1	1	1	1	2	6	2	1	2	1	1	3	1		2	2	2	2	2	2	2	1
1765	1			1			2	3	1	1	1	1	3	5	5	1	3	1				1	5	5	2	1	2	2	1	2	1	2	1	2	2	2	2	2	2	2
1766	2		1				2	3			1		6	1	1	1	1	5	1	1	2	1	1	1	1	1	2	2	2	2	2	2	2	1
1767	1	1	1		1		2	1					1	1	1	1	1	1				1
1768	1		1				2	1						2	5	1	1	5	3	1	2	1	1	1	1	1	1	2	2	2	2	2	2	1	2	2	2	2	2	2
1769	1		1				2	1	1	1			1	1	1	1	1	1	1	1	2	1	1	1	1	2								2	2	2	2	2	2	2
1770	1		1				2	1		1			1	1	1	1	1	4	2	1	2	1	1	4	1	2	1							2	2	1	2	2	2	2
1771	1		1		1	HISPANIC	1	1		1		1	2	1	1	1	4	6	2	1	2	1	1	1	1	2	2	2	2	2	2	2	2	2	2	2	2	2	2	2
1772	2	1					1	1				1	3	5	5	1	1	7	7	7	2	5	5	8	5	2	5	2	2	2	2	2	2	1	1	1	2	2	2	2
1773	1		1				2	1		1	1		2	1	1	1	1	5	3	2	2	1	1	1	1	2	2	2	2	2	2	2	2	2	2	1	2	2	2	2
1774	1		1				2	1			1	1	1	1	1	1	3	1				1	1	1	1	2	1							2	2	2	2	2	2	2
1775	1		1				2	1		1	1		1	1	1	1	1	5				1	1	1	1	2	2							2	2	2	2	2	2	2
1776	1		1					1					3	1	1	2						1	1	1	1	2	1							4	2	2	2	2	2	2
1777	2		1				2	1	1	1	1	1	1	1	1	1	4	5	3	1	2	1	1	3	3	1	3	1	2	2	2	2	2	1
1779	1		1				2	3					2	1	1	1	1	6	5	5	2	1	3	1	1	2	2	2	2	2	2	2	2	3	2	1	2	2	2	2
1780	1		1				2	3			1		1	2	1	1	1	2	6	3	1	1	2	3	3	1	1	1	1	1	1	1	1	1	1	1	1	1	1	1
1781	1		1				2	3			1		2	2	1	1	3	4	3	1	2	1	1	2	1	1	2	2	2	2	2	2	2	5	2	1	1	2	1	2
1782	2		1				2	3	1		1		1	1	1	1	1	1				1	1	1	1	1	1							2	2	2	2	2	2	2
1783	1		1				2	3	1	1	1	1	1	1	1	1	2	6	1	1	2	1	1	1	1	2	1							2	2	1	2	2	1	2
1784	1				1	PUERTO R	1	3		1	1		1	1	3	1	1	4	3	2	2	1	5	3	1	2	2	2	2	2	2	2	2	3	2	2	2	2	2	2
1785	1		1				2	3		1	1		1	1		1	4	6	2	2	2		1	1	1	2	1	2	2	2	2	2	2		2	2	2	2	2	2
1786	1		1				2	1		1			2	5	5	1	1	2	7	7	2	5	5	8	1	2
1787	2		1				2	3		1	1	1	1	3	3	1	2	5	5	3	2	1	1	1	1	1	1	2	2	2	2	2	2	1
1788	1	1	1		1	HAITIAN	2	3		1	1		1	1	3		1	4	5	4	2		2	8	3									2			2	2	2	2
1789		1		1	1			1	1				1	1	3	1	4	6	7	1	2	1	1	1	1	2	1	2	2	2	2	2		2	2	2	2	2	2	2
1790	1		1				2	3	1	1			1	1	1	1	5	1				1	1	1	1	2	1							2	2	2	2	2	2	2
1791	1			1			2	2				1	1	5	5	1	1	4	3	4	2	1	2	8	1	2	1							1
1792	1		1				2	2					2	3	5	1	1	3	5	4	2	5	4	4	1	1	1							5	2	2	1	2	2	2
1793	2		1				2	3			1		2	1	1	2						1	1	1	1	2	1							3	2	2	2	2	2	2
1794	2				1	NATIVE A	2	3	1		1		1	1	1	1	2	6	2	1	2	1	1	1	1	2	2	2	2	1	2	2	2	1
1795	2		1				2	3	1	1		1	1	1	1	1	4	5	1	1	2	1	1	1	1	2	2	2	2	2	2	2	2	1
1796	1	1		1			1	2					4	5	5	1	1	3	7			4
1797	2		1				2	3			1		1	4	5	1	1	3	7	7	1	3	3	2	2	1	5	2	1	1	1	1	1	1
1798	2		1				2	3					1	2	3	1	3	5	1	1	2	1	1	1	1	2	1	2	2	2	2	2	2	1
1799	1		1				2	2					2	4	3	1	2	4	5	2	2	1	5	1	2	2	1							3	1	1	2	2	2	2
1800	1		1				2	2		1			1	1	1	1	3	4	4	2	2	1	1	1	1	2	1							2	2	2	2	2	2	2
1801	2		1				2	2					1	4	3	1	2	5	4	1	2	2	1	1	1	2	3	2	1	1	2	1	1	1
1802	2		1				2	2		1			1	1	1	1	2	5	4	1	2	1	1	1	1	1	3	2	2	2	2	1	2		2	2	2	2	2	2
1803	2		1				2	2	1	1	1		1	3	5	1	3	5	3	3	2	1	1	1	2	1	2	2	2	1	2	1	1	1
1804	2		1				2	2		1			1	1	1	1	4	6	2	1	2	1	1	1	1	2	2	2	2	1	2	1	1	1	2	2	2	2	2	2
1805	2		1				2	2		1			1	1	1	1	5	6	1	1	2	1	1	1	1	2	2	2	2	2	2	2	2	1
1806	2		1				2	2		1			1	1	3	1	4	5	5	4	2	1	1	1	1	2	3	2	2	1		1	1	1	2	2	2	2	2	2
1807	1			1			2	2					1	2	2	1	5	6	4	3	2	1	4	3	1	1	2	2	2	2	2	2	2	2	1	1	2	2	2	2
1808	1		1				2	2		1			1	5	5	1	1	2	7	7	2	3	2	8	1	2	1	2	2	2	2	2	2	4	2	2	2	2	2	2
1809	1		1				2	2	1				2	4	4	1	1	2	5	5	2		5	1	1	2	2							1
1810	2		1				2	2					2
1811	1		1				2	2					2		5	1
1812					1		1	1		1			6	5	5	1	3	7	7	7	2	3
1813	2		1				2	2		1			1
1814	1				1		2	2			1		3																					2	1	2	2	2	2	2
1815	2		1				2	2	1		1		2	1	1	1	3	1				1	1	1	1	2	1							1
1816	2		1				2	2			1		1	1	1	1	5	1				1	1	1	1	2	2							1
1817	2		1				1	2		1			1	1
1818	1		1				2	2		1			1	1	1	1	4	1	1	7	1	1	1	1	1	1	1	2	2	2	2	2	2	5	2	1	1	1	1	2
1819	1		1				2	2		1			1	1	1	2						1	1	1	1	2	2	2	2	2	2	2	2	2	2	2	2	2	2	2
1820	1		1				2	2		1			1	1		1	3	5	5	4	1	1	1	1	1	2	1							1
1821	1		1				2	2		1	1		1	1		2						1	1	1	2	2	1							2	1	1	2	2	2	2
1822	1		1				2	2		1			1	1	1	1	3	5	1	1	2	1	3	1	1	2	1							2	2	2	2	2	2	2
1823	1	1					1	4		1		1	3	2	5	1	5	6	5	6	1		1	3	1	1	1							1
1824	1		1				2	2					6		5	1	1	2	5	1	1	1	1	2	1	1	1	1	1	1	1	1	1		2		1	1	1	2
1825	1		1				2	2		1			2	1	2	1	2	2	6	1	2	1	5	3	1		2	1	2	2	2	2	2	1	2	2	2	2	2	2
1826	2		1				2	2		1			1	2	1	1	4	6	2	2	2	1	1	1	1	2	2	2	2	2	2	2	2	1
1827	2		1				2	2	1			1	1	1	1	1	4	5	5	1	2	4	1	1	1	2	3	2	2	2	2	2	2
1828	1		1				2	2		1			2	1	1	1	2	5	2	1	2	1	1	1	1	2		2						2	2	2	2	2	2	2
1829	2		1				2	2		1			1	1	1	1	4	6	1	1	2	1	1	1	1	2								1	2	2	2	2	2	2
1830	2		1				1	2					1	5	5	1	1	5	2	1	2	5	5	5	1	2	2	2	2	2	2	2	2	1
1831	1	1					1	1				1	5	5	5	1	1	2	7	7	1	5	1	8	5	1	3	2	2	2	2	2	2	5	2	2	1	1	1	1
1832	1		1				2	2		1			1	1	1	1	1	1	5	1	2	1	1	7	1	2	5	2	1	1	2	2	1	1	1	2	1	1	2	1
1833	1		1				2	2		1		1	1	3	3	1	4	5	5	3	2		1	1	1	2	1							1
1834	2		1				2	2		1	1		1	1	4	1	2		3	2	2	1	1	1	1	2								1
1835	2		1				2	2	1	1	1	1	1	1	1	2						1	1	1	1	1	2							1
1836	2		1				2	2		1		1	1	1	1		3	6	1	1	2	1	1	1	1	2	2		2	2	2	2	2	1
1837	1		1				2	2			1		1	2	5	1	3	6	2				5	3										5	2	1	1
1838	2		1				2	2	1	1		1	1	1	1	1	1	1				1	1	2	1		2	2	2	2	2	2	2	1
1839	1		1				2	2			1		2	3	4	1	1	4	1	1	2	1	1	1	1	1	1							2	2	2	2	2	1	2
1840	1		1				2	2	1	1	1		1	3	4	1	3	5	3	1	2	2	1	3	1	2	2							3	2	2	2	2	2	2
1841	2		1				2	2	1				1	1	1	1	4	6	2	1	2	1	1	1	1	2	2	2	2	2	2	1	2	1
1842	2		1				2	2		1			2	2	2	1	4	5	3	2	2	1	1	1	1	2	2	2	2	2	2	2	1	1
1843	1		1				2	3				1	1	1	1	1	2	1				1	5	1	1	2	1	2	2	2	2	2	2	2	2	2	2	2	2	2
1844	1		1				2	3					1	2	1	1	2	5	1	1	2	1	5	1	1	2	1							2	2	2	2	2	2	2
1845	2		1				1	3	1		1	1	1	3	5	1	4	4	1			1	3	1			3	2	2	2	2	2	2	3	1	2	1	1		1
1846	2		1				2	3		1	1		1	1	1	1	5	1				1	1	1	1	2	3	2	2	2	2	2	2	1
1847	1	1		1			1	4					3
1848	2			1			1	3		1		1	1		2	1	1	1	1	1	1	1	2	1	1	1	1	2	2	2	2	2	2				2	2	2	2
1849	2	1					1	1					3
1850	2		1				2	3					2		3	1	3	5	4	3	2	3					2	2	2	2	2	1	1
1851	1		1				2	3		1			1	2	4	1	4	6	3	3	2	1	1	1	1		2	2	2	2	2	2	2	1
1852	2		1				2	3	1	1	1	1	1	1	1	1	1	1	1	1	2	1	1	1	1	2	3	1	1	2	2	2	2
1853			1				1	3			1		2	2	1	1	2	4	3	2	2	1	1	1	1	2	3	2	2	1	2	1	1	1
1854	2				1	MIDDLE E	2	3	1		1		1	1	1	2						1	1	1	1	1	3	2	2	2	2	1	2	1
1855	2		1				2	3		1			2	1													3	2	2	2	2	2	2	1
1856	2		1		1	NATIVE A	2	3	1		1		1	5	4	1	1	4	2	2	1	1	5	3	3	1	1							1
1857	2		1				2	3	1	1	1			1	1	2						1	1	1	1	2	2	2	2	2	2	2	2	1
1858	1			1			2	3		1	1		1	1	1	2						1	1	1	1	2	1							1
1859	2		1				2	3	1	1	1		1	2	3	1	5	6	4	1	2	1	1	1	1	2	2	2	2	2	2	1	2	2	2	2	2	2	2	2
1860	2			1			2	3	1	1	1	1	1	1	1	1	4	1				1	1	1	1	2	2	2	2	2	2	2	2	1
1861	2		1				2	3	1	1		1	1	1	1	1	3	1				1	1	1	1	2	2	2	2	2	2	2	2	1
1862	1		1		1	COLOMBIA	1	3					3	5	5		2	3	7	5	1	5	4	8			4
1863	1						1	3	1	1		1	1	4	5	1	1	1	7	1	1	5
1864	1			1				3		1			2	1	1	1	1	2	1	1	2	1	1	1	1	2								1			1	1	1	1
1865	1		1		1		2	3					2	1	5	1	1	1	1	1	1	1	1	1	1	1	5	1	1	1	1	1	1	5	2	2	2	2	2	2
1866	1		1				2	3				1	3	1	5	1	1	1	1	1	1	5	1	1	1	1	1	1	1	1	1	1	1
1867	2		1				2	3	1		1		1	1	1	1	1	5	1	1	2	1	1	1	1	2	1							1
1868	2		1				2	3	1		1		1	1	2	1	3	1				1	1	1	1	2	1							3	1	2	1	2	2	2
1869	1	1					2	3		1			1	4	1								1	1	1		3	2	2	2	2	1	2	3	2	2	2	2	2	2
1870	2		1				2	3	1		1	1	1		2	1	5	6	1	1	2	1	2	1	1	2	2	2	2	2	2	2	2	2	2	2	2	2	2	2
1871	2		1				2	3					1	5	4	1	5	6	4	4	2	2	1	1	1	1
1872	2		1				2	2		1			1	5	5	1	1	4	5	2	2	2	1	1	1	1	2	1	2	1	1	1	2	1	1	2	1	1	1	1
1873	2		1				2	2		1			1	3	3	1	1	3	5	3	2	1	1	1	1	2	3	1	2	1	2	2	2	1
1874	1		1				2	2	1	1	1	1	1	1	1	1	4	6	4	2	2	1	1	1	1	2	1							1
1875	2		1				2	2		1			1	1	1	1
1876	2		1					2	1	1	1		2	1		1	3	5	3	2	2	1	1	1	1	1	1							4	2	2	2	2	1	1
1877	2		1				2	2		1			1	1	1	1	4	1	1	1	2	1	1	1	1	2	3	1	2	2	2	2	2	1
1878	2		1				2	2	1				2	1	1	1	1	1				1	1	1	1	2	2	2	2	2	2	2	2	2	2	2	2	2	2	2
1879	1			1			2	2	1			1	1	1	1	2						1	1	1	1	2	1	2	2	2	2	2	2	2	2	2	2	2	2	2
1880	1				1	INDIAN	2	2					1	1					1	1	2		1	1	1	2	1							2	2	2	2	2	2	2
1881	2	1			1	SWEDISH	1	2	1		1	1	1	1	2	1	1	5	2	1	2	1	1	1	1	1	4	2	1	2	2	1	1	1
1882	2		1					2		1			1	1	1	1	1	6	1	1	2	1	1	1	1	2	1	2	2	2	2	2	2	1
1883	1		1				2	2	1	1	1		1	1	1	2						1	3	1	1	2	1							1
1884	1				1	ASIAN EU	2	2	1	1	1		1	1	1	1	1	1				1	1	1	1	2	1							3	2	2	2	2	2	2
1885	2	1	1				1	2					2	5	5	1	4	5	7	7	2	4	3	4	2	1	2	1						1
1886	2		1				2	2		1			1	1	1	1		6	1	1	2	1	1	2	1	2	2	2	1	1	2	2	2	1	2	2	2	2	2	2
1887	2		1				2	2					1	5	5	1	4	5	2	2	2	2					2	2	2	2	2	2	2	1
1888	1		1				2	2		1			1	1	1	1	3	5	1	1	2	1	2	1	1	2	1							1
1889	1		1				2	2	1	1			1	1	1	1	3	1				1	1	1	1	2	1							2	2	2	2	2	2	2
1890	2		1				2	2			1		2	3	2	1	1	2	2	1	2	1	1	2	1	2	2	2	1	1	2	2	1	1
1891	2		1				2	2		1			1	1	1	1	3	6	4	2	2	1	1	1	1	2	3	2	2	1	2	2	2	1
1892	2			1			1	2					3	1	5	1	1	2	7			5
1893	2		1				2	2		1			2	1	3	1	5	1	1	1	2	1	1	1	1	2	3	2	2	2	1	1	2	1
1894	2		1				2	2	1	1	1		1	1	1	2						1	1	1	1	2	2	2	2	2	2	2	2	1
1895	1		1				2	2	1	1	1	1	1	1	1	1	2	1				1	1	1	1	2	1							1
1896	2		1				2	2		1			2	1	1	1	3	6	1	1	2	1	1	1	1	2	3	2	2	1	2	2	2	1
1897	2				1	HISPANIC	1	2	1	1	1	1	2	1	2	1	1	4	1	1	2	1	1	1	1	2	2	2	2	2	2	2	2	1	1	1	1	1	1	1
1898	1		1				2	2		1			1	1	1	2						1	1	1	1	2								3	2	1	2	2	1	2
1899	2		1				2	2					2	1	2	1	4	6	2	2	2	1	5	1	1	2	4
1900	1		1				1	2		1			1	1	5	1						5		8	5
1901	2		1				2	1		1	1		1	2	3	1	5	6	5	4	2	1	1	1	1	2	3	2	1	1	2	1	2	1
1902	1	1					2	2		1			1	3	5	1	1	4	5	5	2	1	1	3	1	2	2							1
1903	2		1				2	2	1		1	1	1	1	1	1	5	1				1	1	2	1	2	2							2	2	2	2	2	2	2
1904	2		1				2	2		1	1		1	2	4	1	3	5	3	2	2	1	1	1	1	2	2	2	2	1	2	2	2	1
1905	2		1				2	2					1	5	1	2						1	1	1	1	1	1							1
1906	1		1				2	2	1		1		1	1	1	2						1	1	1	1	2	3	2	2	2	2	2	2	1
1907	2			1			2	2	1	1	1		1	1	2	1	4	5	2	2	2	1	1	1	1	2	3	2	1	1	2	1	1	2	2	2	2	2	2	2
1908	2	1					2	2		1			1	1	5	1	1	2	7	1	1	5	2	2	3	1	1	1	1	2	2	1	2	1
1909	1				1	INDIAN	2	2		1	1		1	1	1	1	4	1				1	1	1	1	2	1							1
1910	1		1					2		1			2	1	2	1	2	5	2	1	2	1	1	1	1	2	1							1
1911	2		1				2	2	1	1		1	1	1	1	1	3	5	3	2	2	1	1	1	1	2	2	1	1	2	1	2	2	2	1	1	2	1	1	1
1912	2		1				2	2		1			1	1	1	1	3	5	4	2	2	1	1	1	1	1	4	2	2	1	2	2	2	2	2	2	2	2	2	2
1913	1		1				2	2								1	1	2	2				1	2	1
1914	1		1				2	2		1			1	1	1	1	1	1	2	1	1	1	1	1	1		1	1	1	1	1	1	1	1	1	1	1	2	1	2
1915	1		1				2	2		1			1	4	5	1	4	5	2	2	1	1	1	7	3	2	5	1	2	2	2	1		4	1	2	1	1	1	2
1916	1		1					2		1			1	5	5	1	3	4	5	6	2	3	2	3	1	2	1							1
1917	2						2	2	1	1			1	1	1	1	5	1				1	1	1	1	2	2	1	2	1	2	2	2	1
1918	1	1	1		1		1	2		1		1	2		5	1	3	4	7	7	1	5					4
1919		1	1		1		1	4	1	1		1	3										5	1	1	2
1920	1		1				2	2	1				2	1	1	2						1	1	1	1	2	1							1
1921	1		1				2	2
1924	1		1				2	2			1		2	1
1925	1		1				2	2	1	1			2	3	5	1	1	2	7	7	2						1
1926	2		1				2	2		1			1	1	1	1	3	1				1	1	3	1	1	2	2	2	2	2	2	2	1
1927	1		1				2	3		1			2	1	1	1	1	1				1	1	1	1	2	2							3	2	1	2	2	1	1
1928	1		1				1	3					2	1		1	6	1					3	8
1929	1		1				2	3		1			1	1	1	1	5	6	1	1	2	1	1	1	1	2	1							4	2	1	2	2	2	1
1930	1		1				2	3		1			1		1		5	6	7	5	2	1	1	1	1	2	1							5	1	2	2	2	2	2
1931	1		1				2	2		1			1	1		1	2	1	1	1	2													2	2	2	2	2	2	2
1932	1		1				2	2	1	1	1		1	1	1	2				1		5
1933	2		1				2	2			1		2	1	3	2						1	1	1	1	1	2	1	2	2	2	2	2	2	2	2	2	2	2	2
1934	2		1				2	3	1				2	5	3	1	4	6	4	2	2	1	1	1	1	1	2	2	2	2	2	2	2	1
1935	2		1				2	3		1	1		2	2	4	1	3	5	5	5	2	1	1	1	1	2	1							1
1936	1			1			2	3	1				1	1	1	1	1	4	4	1	2	1	5	3	1	2	1							5	1	1	2	2	1	1
1937	2		1				2	3			1		1	1	1	1	1	6	2	1	2	1	1	1	1	2	3	1	1	2	2	1	1	2	2	2	2	2	2	2
1938	1		1				1	2		1			1	1		1	3	4	4			5
1939	2		1				1	2					1	1	4	1	4	6	5	5	2	1	1	1	1	1	1							1
1940	1		1					2	1	1			1	1	1	1	4	1				1			1	2	1										2	2	2	2
1941	1			1			2	2	1	1	1		1	1	1	2						1	1	1	1	2	2	2	2	2	2	2	2	2	2	2	2	2	2	2
1942	2		1				2	2			1		2	1	1	1	1	5	2	1	2	1	1	1	1	1	3	2	2	2	2	1	1	1
1943	2		1				2	2	1			1	1	1	1	1	5	6	2	1	2	1	1	1	1	2	4	2	1	1	2	1	1	1
1944	2		1				2	2	1				2	3	3	1	1	3	3	2	2	2	1	1	1	2	2	2	2	2	2	1	2	1
1945	1		1				2	2		1		1	1	1	1	2						1	1	1	1	2	1							3	1	2	2		2	2
1946	2		1				2	2		1		1	1	1	1	2						1	1	1	1	2	2	2	2	2	2	2	2	1
1947	1		1				2	2		1			1	1	1	1	5	1				1	1	1	1	2	2	2	2	2	2	2	2	2	2	2	2	2	2	2
1948	2		1				2	2					1	5	5	1	3	4	2	3	2	3	1	2	1	1	3	2	2	2	2	2	2	1
1949	2		1				1	2					2	5	5	1	3	4	6	6	2	3	2	8	5	2	5	2	2	1	2	1	2	5	2	2	1	2	1	2
1950	2		1				2	2		1			2	3	5	1	1	4	4	6	2	3	4	3	1	1		2	2	1	2	2	1
1951	1		1				2	2	1	1		1	1	1	1	1	5	6	2	1	2	1	1	1	1	2	2	2	2	2	2	2	2	1
1952	2		1				2	2		1			1	1	2	1	4	5	2	1	2	1	1	1	1	2	3	1	2	2	2	2	2	1
1953	2		1				2	2		1			1	1	1	1	4	5	3	2	2	1	1	1	1	1	2	2	2	2	2	2	2	1
1954	2		1				2	2		1	1		1	1	2	1	4	5	2	1	2	1	1	1	1	2	2	2	2	2	2	2	2	1
1955	1		1				2	2		1		1	1	1	1	1	5	6	1	1	2	1	1	1	1	2	2	2	2	2	2	2	2	1
1956	2		1				2	3	1				1	1	1	1	2	6	1	1	2	1	1	1	1	1	1	2						1
1957	2		1				2	3		1	1		2	1	1	1	1	6	1	1	2	1	1	1	1	2	1	2	2					1
1958	2		1				2	3			1		2		1	1	1	6	2	1	2	1	1	1	1	2	1	2	2	2	2	1		1
1959	2		1				2	3			1		1	1	1	1	1	1				1	1	1	1	2	1							1
1960	1		1				2	3		1			2	1			1	4	2	1	2	1	1	2	1	2	1							2	2	2	2	2	2	2
1961	1	1					2	3	1	1	1	1	1	1	1	1	3	6	1	1	2	1	1	1	1	2	1							2	2	2	2	2	2	1
1962	1		1				2	3		1			1	2	2	1	2	3	2	2	2	1	1	1	1	2	1							5	2	1	2	1	1	1
1963	1		1				2	3		1			1	1	2	1	6	7	1	1	2	1	1	1	1	2	2	2	2	2	2	2	2	2	2	1	2	2	2	2
1964	1		1				1	3	1	1	1	1	1	5	4	1	3	4	7	6	1	5	5				3	1	1	1	1	1	1	1	1	1	1	1	1	1
1965	2		1				2	3					2	5	5	1	2	5	5	5	1	3	1	8	1	2	1	2	2	2	2	2	2	2	2	2	2	2	2	1
1966	2		1				2	3					1	5	5	1	1	2	7	7	1	5	5	8	5	1	5	2	2	1	2	2	1	5	2	2	1	2	1	1
1967	2		1				2	3	1	1			1	1	2	2	5	5	1	1	1	1	1	6	5	1	1	1	2	2	2	2	2	4	1	2	1	2	1	1
1968	2				1	MIDDLE E	2	3	1				1	2	1	1	6	7	1			1	1	1	1	2	3	2	2	2	2	1	2	1
1969				1			2	3			1		1	1	1	2						1	1	1	1	2	1							5	2	2	2	2	2	2
1970	2		1				1	3	1	1	1		1	5	5	1	1	2	7	7	1	5	5	8	5	1	5	1	1	1	1	1	1	5	1	1	1	1	1	1
1971	1		1				2	3	1				2	1	1	1	5	1				1	1	1	1	2	1							5	2	1	2	1	1	1
1972	2		1				2	3			1		1	1	3	1	1	5	2	1	2	1	1	1	1	2	2	2	2	1	2	1	1
1973	2		1				2	3	1				1	2	3	1	2	6	3	3	2	1	1	1	1	2	2	2	2	2	2	2	2	1
1974	2		1				2	2		1			1	1	3	1	1	6	1	1	2	1	1	1	1		4	2	2	1	2	1	1	1
1975	2				1		2	2		1			1	1	1	1	5	1				1	1	1	1	2	3	2	2	2	2	2	1	1
1976	2		1				2	2		1	1		1	1		1	5	6	1	1	2	1	1	1	1	2	1							1
1977	2		1				2	2	1			1	1	1	1	1	4	6	2	2	2	1	1	1	1	2	2	2	1	1	2	2	2	2	2	1	1	2	1	2
1978	2		1				2	2			1	1	2	2	1	1	4	5	1	1	2	1	1	2	1	2	2	2	2	1	2	2	2	1	2	2	2	2	2	2
1979	2				1	HISPANIC	1	2	1		1		1	1	1	1	4	5	2	2	2	1	1	1	1	2	1	2	1	2	2	2	2	1
1980	1		1				2	2	1	1	1	1	1	1	1	2						1	1	1	1	2	1							2	2	2	2	2	2	2
1981	1		1					2	1	1			1	1	1	2						1	1	3	2	2	1							2	1	2	1	1	1	1
1982	2		1				2	2					2	5			3	5	5	4	2
1983	1		1				2	2	1				1	1	1	2						1	2	1	1	2	1							3	2	2	2	2	2	2
1984	2		1				2	2					1	3	5	1	1	5	3	2	2	1	1	3	1	1	2	1	2	2	2	1	2	1
1985	2				1	HISPANIC	1	3					2	5	5	1	5	5	6	6	2	2	2		2	2	2	2	2	1	2	2	2				1	1	1	2
1986	2		1				2	2		1			1	1	1	1	5	1				1	1	1	1	2	4	2	2	2	2	2	2	1
1987	2		1				2	2	1	1			2	1	1	1	4	5	2	1	2	1	1	2	1	2	2	2	2	1	2	2	2	1
1988			1				2	2		1			1	1	1	1	2	1				1	1	1	1
1989	1		1				2	2					2	1	1	1	1	4	1	1	2	1	1	2	1	2	1							2	2	1	2	2	2	2
1990	2		1					2					1	2	5	1	2	3	5	2	2	2	1	2	1	1	3	1	1	1	2	2	2	1
1991	1		1				2	2		1			1	1	1	1	4	6	1	1	2	1	1	1	1	2	1							3	2	2	2	2	2	2
1992	2			1			2	2	1				1	1	1	1	5	1	1	1	2	1	1	1	1	1	4							1
1993	2		1				2	2					1	1	5	1	4	6	1	1	2	1	1	1	2	1	2	2	2	2	2	2	2	1
1994	2		1				2	2			1		2	3	1	2						1	1	1	1	2	1							1
1995	2		1				2	2		1	1		1	1	1	2						1	1	1	1	2	2	2	2	2	2	2	2	1
1996	2		1				1	2		1			1	1	1	1	4	6	1	1	2	1	1	1	1	2	2	2	2	1	2	2	2	2	2	2	2	2	2	2
1997	2	1	1				2	3			1		6	4	1	1	1	6	2	1	2	1	1	1	2		4	2	2	2	2	2	2	1
1998	1		1				2	3	1	1			1	2	1	1	2	7	2	1	2	1	1	2	1	2	2							2	2	2	2	2	2	2
1999	1			1			2	3			1		1	2	1	1	5	7	2	1	2	1	1	1	1	2	1							5	2	1	2	2	2	2
2000	2		1				2	3					1	4	4	1	1	5	1	1	2	1	1	1	1	2	1							2	2	2	1	2	2	2
2001	1		1				2	3		1			2	4	5	1	4	5	5	5	2	2	1	4	2	1	1							2	2	1	2	2	2	2
2002	1		1				2	3			1		1	3	1	1	4	1				1	1	1	1	2	1							2	1	2	1	2	2	2
2003	2		1				2	3		1			2	1		1	5	6	4	4	2	1	1	1	1		3	2	2	2	2	2	2	1			2	2	2	2
2004	1		1				2	3		1	1		1	5	1	1	1	1	1	1	1	5	5	8	5	1	5	1	1	2	2	1	1		1	1	1	1	1	1
2005	1		1				2	3					1	1	5							5	5	4	5	1								5
2007	2		1				2	3	1				1	5	1	1	4	7	2	1	2	1	2	5	2	1	2	2	2	2	2	2	2	2	1	2	2	2	2	2
2008	2						1	4				1	3	3		1	6			4		5	1	6	3	1	1	1		2	1	1	1		1	1	2	2	2	2
2009	1		1				1	3	1				1
2010	1		1				2	3					1			1				2			2	2	2	1	3	1	1	1	1	1	1	2	1	1	1		2	1
2011	1		1				2	3					1			2				7	2					2		2	2	2	2	2	2		2	2	2	2	2	2
2012	1	1					2	2				1	6	5	5	1	1	2	7	6	2	5	5	8	5	2	3	2	2	2	2	2	2	3	2	2	2	2	2	2
2013	2		1				2	2		1			2	2	4	1	4	5	1	1	2	1	1	1	1	2	3	2	2	2	2	2	2	1
2014	1		1				2	3					1	4	1		1	4	7	7	2	1	5	2	1	2	2	2	1	2	2	2	2	2	2	2	1	2	2	2
2015	1		1				2	2	1	1	1		1	1	1	1	3	6	3	1	2	1	1	1	1	2	1							2	2	2	2	2	2	2
2016	1			1			1	2	1	1	1	1	3	4	5	1	1	1	5	4	1	4	2	1	2		1							2	1	1	2	2	1	1
2017	1			1			2	2	1				2	4	1	2	6	1	1	1	2	2	1	1	2	2	1	1	2	1	1	2	2	1	1	1	2	1	2	1
2018	2		1				2	3					2	5	5	1	1	5	5	4	2	1	1	1	1	2	2	2	2	2	2	2	2	2	2	2	2	2	2	2
2019	2		1				1	3					1	5	5	1	1	5	5	4	2	1	1	1	1	2	2	2	2	2	2	2	2	2	2	2	2	2	2	2
2020	2		1				2	3					2	5	5	1	1	5	2	2	2	2	4	1	1	2	2	2	2					3	2	2
2021	2		1				2	3		1			2	1	2	1	5	6	1	1	2	1	1	1	1	1	3	2	1	1	2	2	2	1
2022	1		1				2	3		1	1		1		1	1	2	6									1							1
2023	2		1	1			2	3					1	1	2	1	5	6	1	1	2	1	1	1	1	2	2	1	2	1	2	2	2	2	2	2	1	2	2	2
2024	2		1				2	3					1	3	1		4	6	1	1	2	1	1	1	1	2	2	2	2	2	2	2	2	1
2025	2		1				2	3					2	5	5	1	3	5	3	2	2	2	1	3	3	1	3	2	2	2	2	2	2	2	2	2	2	2	2	2
2026	1	1					1	3				1	2	5	5	1	1	2	7	7	1	5	5	8	5	1	5	2	2	1	1	1	1	5	2	2	1	2	1	1
2027	2		1				2	3			1		1	2	2	1	4	6	3	3	2	1	1	1	1	2	2	2	2	2	2	2	2	1
2028	2		1				2	3					2	5	4	1	1	3	2	1	2	1	1	2	2	1	3	2	2	2		1	1	1
2029	2		1				2	3			1		2	2		1	4	6	4		2
2030	1		1				1	3		1			1		1	2	1	3	1			5	5	7	2	1		1	1	1	2	2	2
2031	2				1	HISPANIC	1	3	1				2	1	1	2						1	1	1	1	2	1	1	1	1	1	1	1	1	2	2	2	2	2	2
2032	1			1	1		2	1					3		5	1	1	2	7			5	5	8
2033	1		1				2	3		1			1	3	3	1	1	2			2	1	2	8	2	2	1	1						2	1	1	1	2	1	2
2034	1		1				2	3		1			2	1	1	1	1	5	3	2	2	1	5	5	1	2	1							1	2	1	2	2	2	2
2035	2			1			2	3	1		1		1	2	1	1	4	5	3	2	1	1	1	1	1	2	4	1	1	2	2	2	1	1
2036	2		1				2	3		1	1		1	1	1	1	5	6		1	1	1	1	1	1	2	2	2	2	2	2	2	2	1	2	2
2037	2		1				2	3	1	1			1	1	2	1	5	6	2	1	2	1	1	1	1	1	3	2	1	1	2	1	1	1
2038	1		1				2	3		1	1		2	3	4	1	4	5	3	2	2	1	1	1	1	2	2	2	2	2	2	2	2	2	2	2	2	2	2	2
2573	2	1			1	JAMAICAN	2	3	1				1	1	1	2						1	1	1	1	2	1	2	2	2	2	2	2	1
2574	2	1			1	JAMAICAN	2	3	1			1	2	3	2	1	4	6	1	1	2	1	1	1	1	2	2	1	1	1	2	2	2	1
2575	1		1				2	3					1	1	1	2						1	1	1	1	2	1							2	2	2	2	2	2	2
2576	2		1				2	3					1	5	5	1	4	5	5	5	1	5	1	1	1	2	2	1	2	2	2	1	1	1
2577	2		1				2	3		1			2	5	4	1	1	4	5	3	2	2	1	2	1	2	2	1	1	1	2	1	2	1
2578	2		1		1	ITALIAN	2	3	1	1	1		1	1	1	1	5	1				1	1	1	1	2	2	2	2	2	2	1	2	1
2579	2		1				2	3					1	1	1	1	5	1				1	1	1	1	2	2	2	2	2	2	1	2	1
2580	1		1				2	3				1	2	1	1	1	4	5	2	1	2	1	1	1	1	1	1	2	2	2	2	2	2	3	2	1	2	2	2	1
2581	2		1				2	3			1		2	1	1	1	3	1				1	1	1	1	1	4	2	2	2	2	2	2	1
2582	2				1		1	3		1	1		1	1	1	1	4	6	3	3	2	1	1	2	1	2	3	1	1	1	2	1	1	1
2583	2		1				2	3	1	1	1		4	2	5	1	3	5	4	3	2	1	1	1	1	2	4	2	2	2	2	2	2	1
2584	2		1				2	3		1			1	5	5	1	1	5	6	6	1	1	1	1	1	2	4	2	2	1	2	2	1	1			2	2	2	2
2585	1		1				2	3		1			1	1	1	1	4	1				1	1	1	1	2	2	2	2	2	2	2	2	2	2	2	2	2	2	2
2586	2		1				2	3		1	1		1	1	5	1	4	6	3	1	2	1	1	1	1	2	2	2	2	2	2	2	2	1
2587	2		1				2	3		1			2	1	2	1	4	6	3	3	2		1	3	1	2	4	1	2	1	2	2	2	1
2588		1	1		1	PUERTO R	1	3		1			2	1	1	1	5	6	1	1	2		2	3	1	2	3	2	1	2	2	2	2	2	2
2589	2	1	1				2	3	1				1		2	1	5	6	1	1	2		1	2	1	1	2	2	2	2	2	2	2	1	2	2	2	2	2	2
2590	1	1					2	3		1			1	1
2591	2				1		2	3			1		5	1	1	2						1	1	1	1	2	1							1
2592	2		1				2	3	1				2	3	1	1	5	6	2	1	2	1	1	1	1	2	3	2	2	2	2	2	2	2	2	2	2	2	2	2
2593	2	1					2	3	1				4	1		2				1		1	1	1	1		3	2	2	2	2	2	2	3	2
2594	2				1		1	3			1		3	1	1	2					2	1	1	1		2		1	1	1	1	1	1	1	1	2	2	2	2	2
2595	2	1			1	ITALIN	2	3					4	3	2	1	5	6	2	1	2	1	1	1	1	2	4	2	2	2	2	2	2	1
2596	1	1					2	3		1			1	1	1	2			1	1	2	1	1	1	1		1	1	1	1	1	1	1	2	1	1	1	2	2	2
2597	1		1				2	3	1				5	5	5	1	4	5	5	3	2	1	5	1	1	1	2	1	2	2	2	2	2	2	2	2	2	2	2	2
2598	1			1			2	4		1			4	1	1	2	6	7	4	4	2	1	1	1	1	2	3	2		1	2	1	1	1	1	2	1	2	2	2
2599	2				1		2	3		1			3
2600	1		1				2	3		1			1		4	1	5	6	4	4	2
2601	2		1				2	3		1			1		1	1	5	6	3	3	2		1	1	2	1	3	2	1	2	1	1	1
2602	1		1				2	3			1		1	3	1	1	1	5	4	4	2	1	4	1	1	2	1							5	2	2	1	2	1	1
2603	2		1				2	3	1		1		1	1	1	1	5	1				1	1	1	1	2	1							4	2	2	2	2	2	2
2604	1	1					2	3					1	2	2	1	4	1				1	1	1	1	2	2	2	1	2	2	2	2	2	2	2	2	2	2	2
2605	2		1		1	NATIVE A	2	3					2	4	2	1	4	6	1	1	2	1	3	1	1	1	1							2	2	2	2	2	1	2
2606	2		1				2	3			1	1	1	1	1	1	3	1	1	1	2	1	1	1	1	2	2	2	2	2	2	2	2	1
2607	1				1	ALASKAN	2	3		1			1	1	1	2						1	1	1	1	2	2	2	2	2	2	2	2	2	2	2	2	2	2	2
2608	2		1					3	1		1		1	2	1	2						1	1	1	1	2	2	2	1	2	2	2	2	1
2609	2		1		1	CUBAN	1	3	1		1		2	1	1	1	4	6	1	1	2	1	1	1	1	2	4	2	2	2	2	1	1	1
2610	2		1				2	3			1		1	1	1	1	1	6	1	1	2	1	1	1	1	2	1							1
2611	1		1				2	3		1			4	3	5	1	4	5	4	1	2	1	5	7	2	1								1
2612	2		1				2	3			1		1	3	2	1	5	6	2	2	2	1	1	1	1	1	2	2	2	2	2	2	2	2	1	2	2	2	2	2
2613	2		1				2	3			1		1	4	2	1	1	5	1	1	2	1	1	1	1	2	4	2	1	1	2	1	1	1
2614	2		1		1	HISPANIC	1	2					1	1	1	2						1	1	1	1	2	3	2	2	2	2	2	2	2	2	2	2	2	2	2
2615	2				1	HISPANIC	1	3			1		2	2	1	1	6	7	1	1	2	1	1	1	1	2	3	2	2	2	2	2	2	1
2616	2		1				2	3					2	5	3	1	5	6	5	2	2	2	1	1	1	2	3	2	2	1	2	2	1	2	2	2	2	2	2	2
2617	1		1				2	4		1			1	3	3	1	4	5	4	3	2	3	1	2	1	2	1							2	2	2	2	2	2	2
2618	1				1	PUERTO R	1	4			1		1	1	1	2						1	1	1	1	2	2	2	2	2	2	2	2	2	2	2	2	2	2	2
2619	2	1					2	4		1			2	1	1	1	5	7	1	1	2	1	1	1	1	1	3	1	2	2	2	2	2	4	2	1	2	2	2	2
2620	1		1				2	4					1	3	4	1	1	2	4	4	2	1	5	1	1	1	2	2	2	2	2	2	2	2	2	2	2	2	2	2
2621	2		1				2	3		1	1		1	4	2	1	4	6	1	1	1	1	1	1	1	2	4	1	1	2	2	2	2	1
2622	2		1				2	3					1	3	2	1	3	5	4	4	2	1	1	4	1	1	2							1
2623	2		1				2	3			1		2	1	1	1	3	1				1	1	1	1	2	2	1	1	2	2	2	2	1
2624	2		1				2	3		1			1	2	2	1	4	5	3	2	2	1	1	1	1	2	2	1	1	1	2	1	1	1
2625	1		1					3				1	1	2	5	1	3	3	2	3	1	2	2	7	3	1	3			1	1		1
2626	1	1					2	3	1				1	2	2	1	2	3	2	1	2	1	4	3	1	2	3	1	1	1	2	2	2	4	2	2	2	2	2	2
2627	2		1				2	2		1	1		2	3	3	1	4	5	4	2	2	1	1	1	1	2	2	2	2	2	2	1	2	1
2628	2	1					2	2		1			1	1	1	1	1	5	1	1	2	1	1	3	1	1	3	2	2	2	2	2	2	2	2	2	2	2	2	2
2629	2	1					2	4				1	2	1	1	1	3	1				1	1	1	1	2	2	2	2	2	2	2	2	1
2630	2				1	HISPANIC	1	3					1	1		1	5	1	1	1	2	1	1	1	1	1	4	2	1	2	2	2	1	1
2631	1	1					2	3		1			1	1	1	1	3	1				1	1	1	1	2	1							2	2	2	2	2	2	2
2632	2	1						3			1		2	1	1	1	4	5	2	1	2	1	5	4	1	2	4	2	1	2	2	2	2	1
2633	1	1						3		1			1
2634	2		1				2	3			1		1	2	1	1	4	5	2	1	2	1	1	1	1	1	1							2	1	2	2	2	2	2
2635	2		1				2	3	1	1	1		1	1	1	2						1					2	2	2	2	2	2	2	1
2636	1		1				2	3					2	1	1	1	4	1				1	1	3	1	2	1							3	2	1	1	2	1	1
2637	1	1					2	3		1			1	2	2	1	4	5	1	1	2	1	1	1	1	2	1							2	1	2	2	2	2	2
2638	2		1				2	3	1	1			1	5	2	1	4	5	4	2	2	1	1	2	1	2	2	2	2	2	2	2	2	1
2639	2		1				2	4					6	3	3	1	5	6	4	2	2	1	1	1	1	1	3	1	2	2	1	1	1	2	2	2	2	2	2	2
2640	2	1					2	4					2	3	2	1	6	7	4	4	2	1	1	1	1	2	4	1	1	2	1	1	2	1
2641	2		1				2	3		1	1		1	1	1	1	5	7	1	1	2	1	1	1	1	2	2	2	2	2	2	2	2	2	2	2	2	2	2	2
2642	1		1				2	3		1			1	1	1	1	4	6	1	1	2	1	1	1	1	2	1							2	2	2	2	2	2	2
2643	2		1				2	3				1	1	1	1	2						1	1	1	1	2	2	1	2	2	2	2	2	2	1	2	2	2	2	2
2644	1				1			3					1	1	1	2						1	1	1	1		1							3	2	2	2	2	2	2
2645	1				1	INDIAN A		3	1	1		1	1	2	4	1	2	3	4	4	2	1	5	8	1	1								4	2	1	2	2	1	2
2646	2				1		2	3					1	1		2						1	1	1	1	2	5	2	2	1	2	2	2	1
2647	1	1					2	3					5	1	5	1	2	6	1	1	2	1	1	3	1	2	3	2	2	2	2	2	2	2	2	2	2	2	2	2
2648	2				1	HISPANIC	1	3		1			1	1	1	1	4	6	2	1	1	1	1	1	1	2	3	1	1	2	2	2	2	1
2649	1	1					2	3	1	1	1		1	5	5	1	3	6	2	2	2	1	1	1	1	1	2							1	2	2
2650	2	1					2	3			1	1	1	1		2						1	1	3	1	1	3	1	1	2	2	2	2	1
2651	1		1				2	3		1	1		1	1	2	1	5	6	1	1	1	1	1	1	1	2	2							4	2	2	2	2	2	2
2652	2		1				2	3		1	1		1	4	3	1	3	5	4	4	2	1	1	2	1	2	3	2	2	2	2	2	1	1
2653	2			1	1	WEST IND	2	4	1	1	1	1	1	2	1	1	5	3	1	1	2	1	1	1	1	1	2	2	2	2	2	2	2	2	2	2	2	2	2	2
2654	2				1	PAKISTAN	2	4					1	1	1	2						1	1	1	1	2	2	2	2	2	2	2	2	1
2655	2		1				2	4	1		1		1	1	1	1	6	1				1	1	1	1	2	1							1
2656	2				1	PUERTO R	1	3	1		1		1	1	1	1	4	6	1	1	2	1	1	1	1	2	2	2	2	2	2	2	2
2657	2		1				2	3		1	1		2	1	1	1	2	1				1	1	1	1	2	2	2	2	2	2	2	2	1
2658	2		1				2	3		1	1		2	1	1	2						1	1	1	1	2	2	2	2	2	2	2	2	1
2659	2		1				2	3	1		1		1	3	3	1	3	5	3	2	2	4	1	1	1	1	2	2	2	2	2	2	2	1
2660	2		1				2	3				1	1	1	1	1	4	1				1	1	1	1	2	1							1
2661	2		1				2	3		1	1		1	1	1	1	2	1				1	1	1	1	2	3	1	1	2	2	2	2	1
2662	1	1					2	3		1	1		2	1	4	1	5	1				1	1	1	1	1	3	2	2	2	2	2	2	2
2663	2				1	CAPE VER	2	3					1	2	1	1	2	5	2	1	2	1		1	1	2	2	2	2	2	2	2	2	1
2664	2		1					3	1	1	1		1	2	1	1	5	6	2	2	2	1	1	1	1	2	1	2						1
2665	2		1				2	3	1	1	1	1	1	3	3	1	4	5	2	1	2	1	1	1	1	1	3	2	2	2	2	2	2	1
2666	2		1					3					1															2	2	2	2	2	2	1	2	2	2	2	2	2
2667	1				1	HISPANIC	1	3					1	1	1	1	5	7	1	1	2	1	1	3	1	2	1							2	2	2	2	1	2	2
2668	1				1	HISPANIC	1	3		1			1	1	1	1	3	5	1	1	2	1	2	1	1	2	3	2	1	2	2	2	2	2	2	2	2	2	2	2
2669	2				1	HISPANIC	1	2	1				2	1	1	1	5	1	1	1	2	1	1	2	2		1							1
2670	2	1					2	3				1	1			1	2		1				1
2671	1		1					3		1			2	1	5	1	5	6	6		2
2672	1		1				2	4					1	5	5	1	1	6	4	4	2	1	1	3	1	2	2	2	2	2	2	2	2	2	2	2	2	2	2	2
2673	2		1				2	4					2	3	2	1	3	6	6	6	2	1	1	2	1	2	1							1
2674	2				1	HISPANIC	1	4					1	1	1	2			1				1	1	1	2	4	1	2	2	2	2	2	2	1	2	2	2	2	2
2675	2	1					2	3	1			1	1	2	5	1	2	3	4	2	2	1	3	6	1	2	3	1	1	1	1	2	1	2	1	1	2	2	2	2
[truncated: 2,525 more rows]
